# Supplementary material
Source: publisher figshare collection journal article supplement (https://acs.figshare.com/ndownloader/files/4470478)

# Propargylic and Allenic Carbocycle Synthesis through Palladium-Catalyzed Dearomatization Reaction

Bo Peng,<sup>†</sup> Xiujuan Feng,<sup>†</sup> Xin Zhang,<sup>‡</sup> Sheng Zhang,<sup>†</sup> and Ming Bao<sup>\*,†</sup>

<sup>†</sup>*State Key Laboratory of Fine Chemicals, Dalian University of Technology, Dalian 116012, China*

<sup>‡</sup>*School Environmental Science & Technology, Dalian University of Technology, Dalian 116023, China*

xijujuan.feng@163.com (X. J. Feng), mingbao@dlut.edu.cn (M. Bao).

## Table of Contents

|                                                                                                                                                                                                                                                                                               |         |
|-----------------------------------------------------------------------------------------------------------------------------------------------------------------------------------------------------------------------------------------------------------------------------------------------|---------|
| General                                                                                                                                                                                                                                                                                       | S2      |
| Preparation of benzylic chlorides and spectral data                                                                                                                                                                                                                                           | S2-S6   |
| <sup>1</sup> H and <sup>13</sup> C NMR spectra of starting materials ( <b>1h</b> , <b>1j</b> , <b>1k</b> , <b>1m-p</b> and <b>1r</b> )                                                                                                                                                        | S7-S22  |
| <sup>1</sup> H and <sup>13</sup> C NMR spectra of dearomatization products ( <b>5a-e</b> , <b>5h-k</b> , <b>5a'</b> , <b>5b'</b> , <b>5j'</b> , <b>5k'</b> , <b>6l</b> , <b>6o</b> , <b>6p</b> , <b>6r</b> , <b>6l'</b> , <b>6m'</b> , <b>6o'</b> , <b>6q'</b> , <b>7a-d</b> , and <b>9</b> ) | S23-S74 |

**General.** All experiments were carried out under standard Schlenk techniques. Solvents were dried and degassed before use by standard procedures. The starting materials **1a**, **1b**, **1c**, **1d**, **1e**, **1f** and **1q** are commercially available. Compounds **1g**,<sup>1</sup> **1i**,<sup>2</sup> **1l**,<sup>3</sup> and **3a-d**<sup>4</sup> have appeared in the literatures.

### Preparation and spectral data of benzylic chlorides

#### 2-(4-(Chloromethyl)phenyl)-1,3-dioxolane (**1h**).

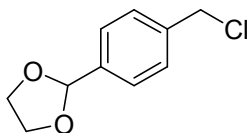

To a solution of PPh<sub>3</sub> (288.2 mg, 1.1 mmol) in CCl<sub>4</sub> (3 mL) at room temperature was added 4-(1,3-dioxolan-2-yl)benzyl alcohol (180.2 mg, 1.0 mmol). After the mixture was stirred at 50 °C for 30 minutes, the solvent was removed under a reduced pressure, and the residue was purified with basic alumina column to give **1h** as colorless oil in 95% yield (188.1 mg). It is worth noting that the deprotection reaction of the acetal moiety could readily take place when NCS/PPh<sub>3</sub> or PCl<sub>3</sub>/CH<sub>2</sub>Cl<sub>2</sub> was employed as a chlorination reagent. <sup>1</sup>H NMR (400 MHz, CDCl<sub>3</sub>) δ 7.46 (d, *J* = 8.0 Hz, 2H), 7.38 (d, *J* = 8.4 Hz, 2H), 5.79 (s, 1H), 4.56 (s, 2H), 4.08 (t, *J* = 3.6 Hz, 2H), 4.01 (t, *J* = 3.6 Hz, 2H); <sup>13</sup>C NMR (100 MHz, CDCl<sub>3</sub>): δ 138.5, 138.4, 128.7, 126.9, 103.4, 65.4, 45.9; IR (neat) 2886, 1721, 1389, 1267, 1083, 743, 679 cm<sup>-1</sup>; HRMS (EI) calcd for C<sub>10</sub>H<sub>10</sub>O<sub>2</sub>Cl: 197.0369 [M-H]<sup>+</sup>; found: 197.0375.

#### 4-Chloro-4'-methylbenzhydryl chloride (**1j**).

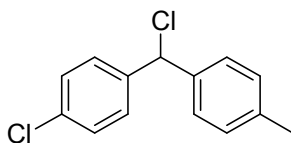

To a solution of 4-chloro-4'-methylbenzhydrol (232.3 mg, 1.0 mmol) in dichloromethane (3.0 mL) at 0 °C was added SOCl<sub>2</sub> (2.0 equiv). After the temperature was enhanced to room temperature slowly and stirred for 8 h, the solvent and excess SOCl<sub>2</sub> were removed under reduced pressure, and the residue obtained was dissolved in dichloromethane (10 mL). The solution was washed with dilute aqueous bicarbonate and dried over magnesium sulfate. Then the solvent was removed under reduced pressure to give pure product **1j** as a brown solid in 98% yield (245.9 mg). <sup>1</sup>H NMR (400 MHz, CDCl<sub>3</sub>) δ 7.33 (d, *J*

= 8.8 Hz, 2H), 7.29 (d,  $J$  = 8.8 Hz, 2H), 7.25 (d,  $J$  = 8.4 Hz, 2H), 7.14 (d,  $J$  = 8.0 Hz, 2H), 6.06 (s, 1H), 2.33 (s, 3H);  $^{13}\text{C}$  NMR (100 MHz,  $\text{CDCl}_3$ ):  $\delta$  139.8, 138.2, 137.7, 133.8, 129.3, 129.1, 128.6, 127.6, 64.4, 21.1; IR (neat) 1904, 1594, 1488, 1089, 1014, 799, 763, 741  $\text{cm}^{-1}$ ; HRMS (EI) calcd for  $\text{C}_{14}\text{H}_{12}\text{Cl}_2$ : 250.0316  $[\text{M}]^+$ ; found: 250.0310.

**4-Methyl-4'-*tert*-butyl-benzhydryl chloride (1k).**

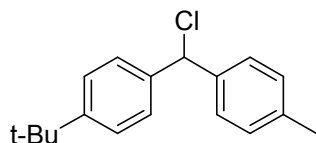

Compound **1k** was prepared according to the procedure for the synthesis of **1j**. Colorless oil;  $^1\text{H}$  NMR (400 MHz,  $\text{CDCl}_3$ )  $\delta$  7.32-7.28 (m, 6H), 7.12 (d,  $J$  = 8.0 Hz, 2H), 6.08 (s, 1H), 2.31 (s, 3H), 1.28 (s, 9H);  $^{13}\text{C}$  NMR (100 MHz,  $\text{CDCl}_3$ ):  $\delta$  151.1, 138.51, 138.46, 137.9, 129.3, 127.8, 127.6, 125.6, 64.4, 34.7, 31.5, 21.3; IR (neat) 2962, 1907, 1511, 1409, 1363, 1108, 768, 578  $\text{cm}^{-1}$ ; HRMS (EI) calcd for  $\text{C}_{18}\text{H}_{21}\text{Cl}$ : 272.1332  $[\text{M}]^+$ ; found: 272.1338.

**Methyl 4-(chloromethyl)-1-naphthoate (1m).**

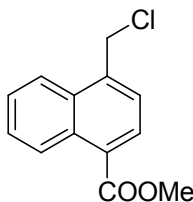

To a mixture of methyl 4-hydroxymethyl-1-naphthoate (216.2 mg, 1.0 mmol) and *N*-chlorosuccinimide (NCS, 145.6 mg, 1.1 mmol) in dichloromethane (50 mL) at -20 °C was added a solution of  $\text{PPh}_3$  (288.0 mg, 1.1 mmol) in dichloromethane (15 mL) through a drop funnel slowly. After the mixture was stirred at -20 °C for 10 minutes, the reaction temperature was allowed to enhance to room temperature slowly. And then the solvent was removed under reduced pressure, and the residue was purified by silica gel column chromatography (eluent: hexane/ethyl acetate = 10/1) to give **1m** as a colorless oil in 85% yield (199.4 mg).  $^1\text{H}$  NMR (400 MHz,  $\text{CDCl}_3$ )  $\delta$  8.94-8.91 (m, 1H), 8.17-8.15(m, 1H), 8.08 (d,  $J$  = 7.2 Hz, 1H), 7.64-7.62 (m, 2H), 7.53 (d,  $J$  = 7.2 Hz, 1H), 5.02 (s, 2H), 3.99 (s, 3H);  $^{13}\text{C}$  NMR (100 MHz,  $\text{CDCl}_3$ ):  $\delta$  167.7, 137.8, 131.6, 131.3, 129.3, 128.6, 127.7, 126.9, 126.6, 126.2, 123.9, 52.3, 43.9; IR

(neat) 2950, 1716, 1592, 1285, 1127, 1012, 809, 717  $\text{cm}^{-1}$ . HRMS (EI) calcd for  $\text{C}_{13}\text{H}_{11}\text{O}_2\text{Cl}$ : 234.0448  $[\text{M}]^+$ ; found: 234.0454.

**(4-(Chloromethyl)naphthalen-1-yl)methanol (1n).**

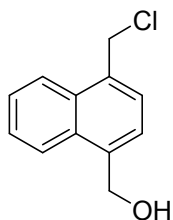

Compound **1n** was prepared according to the procedure for the synthesis of **1m**. Colorless oil;  $^1\text{H}$  NMR (400 MHz,  $\text{CDCl}_3$ )  $\delta$  8.19 (d,  $J = 8.0$  Hz, 1H), 8.15 (d,  $J = 8.0$  Hz, 1H), 7.64-7.57 (m, 2H), 7.49 (d,  $J = 1.6$  Hz, 1H), 7.47 (d,  $J = 1.8$  Hz, 1H), 5.14 (d,  $J = 3.6$  Hz, 2H), 5.04 (s, 2H), 1.78 (s, 1H);  $^{13}\text{C}$  NMR (100 MHz,  $\text{CDCl}_3$ ):  $\delta$  138.0, 133.4, 131.6, 131.4, 127.3, 126.7, 126.6, 124.5, 124.46, 124.41, 63.5, 44.6; IR (neat) 3272, 3175, 2902, 1452, 1345, 1256, 1162, 1071, 835, 690  $\text{cm}^{-1}$ ; HRMS (EI) calcd for  $\text{C}_{12}\text{H}_{11}\text{OCl}$ : 206.0498  $[\text{M}]^+$ ; found: 206.0504.

***tert*-Butyl((4-(chloromethyl)naphthalen-1-yl)methoxy)-dimethylsilane (1o).**

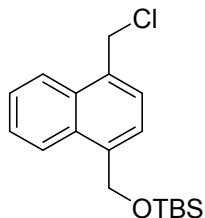

Compound **1o** was prepared according to the procedure for the synthesis of **1m**. Colorless oil;  $^1\text{H}$  NMR (400 MHz,  $\text{CDCl}_3$ )  $\delta$  8.20 (d,  $J = 8$  Hz, 1H), 8.05 (d,  $J = 8$  Hz, 1H), 7.60-7.52 (m, 4H), 5.24 (s, 2H), 5.06 (s, 2H), 1.02 (s, 9H), 0.18 (s, 6H);  $^{13}\text{C}$  NMR (100 MHz,  $\text{CDCl}_3$ ):  $\delta$  138.7, 132.4, 131.3, 131.2, 127.6, 126.5, 126.2, 124.5, 124.1, 123.2, 63.3, 44.9, 26.1, 18.6, -5.1; IR (neat) 2954, 2855, 1517, 1470, 1256, 1114, 837, 778, 754  $\text{cm}^{-1}$ . HRMS (EI) calcd for  $\text{C}_{11}\text{H}_{12}$ :  $\text{C}_{18}\text{H}_{25}\text{OSiCl}$ : 320.1363  $[\text{M}]^+$ ; found: 320.1355.

### 1-(Chloromethyl)-4-phenylnaphthalene (**1p**).

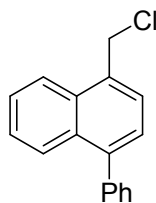

Compound **1p** was prepared according to the procedure for the synthesis of **1m**. Colorless oil;  $^1\text{H}$  NMR (400 MHz,  $\text{CDCl}_3$ )  $\delta$  8.20 (d,  $J = 8.0$  Hz, 1H), 7.93 (d,  $J = 8.0$  Hz, 1H), 7.62-7.58 (m, 1H), 7.55 (d,  $J = 8.0$  Hz, 1H), 7.50-7.41 (m, 6H), 7.36 (d,  $J = 7.2$  Hz, 1H), 5.08 (s, 2H);  $^{13}\text{C}$  NMR (100 MHz,  $\text{CDCl}_3$ ):  $\delta$  142.0, 140.3, 132.4, 132.2, 131.3, 130.0, 128.3, 127.4, 127.2, 127.1, 126.5, 126.3, 126.2, 123.8, 44.7; IR (neat) 3056, 1583, 1514, 1392, 1257, 1030, 938, 844, 768, 728, 703  $\text{cm}^{-1}$ ; HRMS (EI) calcd for  $\text{C}_{17}\text{H}_{13}\text{Cl}$ : 252.0706  $[\text{M}]^+$ ; found: 252.0711.

### 1-(4-Methylnaphthalen-1-yl)pentyl 2,2,2-trifluoroacetate (**1r**).

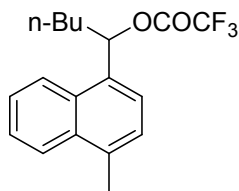

To a solution of 1-(4-methylnaphthalen-1-yl)pentan-1-ol (228.3 mg, 1.0 mmol) in dichloromethane (3.0 mL) at  $-20$   $^{\circ}\text{C}$  was added trifluoroacetic anhydride (231.5 mg, 1.1 mmol). Then the reaction temperature was allowed to enhance to room temperature slowly. And then the solvent was removed under reduced pressure, and the residue was purified by silica gel column chromatography (eluent: hexane/ethyl acetate = 10/1) to give **1r** as a colorless oil in 71% yield (230.1 mg).  $^1\text{H}$  NMR (400 MHz,  $\text{CDCl}_3$ )  $\delta$  8.10-8.04 (m, 2H), 7.59-7.54 (m, 2H), 7.44 (d,  $J = 3.6$  Hz, 1H), 7.32 (d,  $J = 7.2$  Hz, 1H), 6.63 (dd,  $J = 4.0, 2.8$  Hz, 1H), 2.69 (s, 3H), 2.19-2.08 (m, 2H), 1.43-1.30 (m, 4H), 0.88 (t,  $J = 6.8$  Hz, 3H);  $^{13}\text{C}$  NMR (100 MHz,  $\text{CDCl}_3$ ):  $\delta$  157.2, 156.8, 135.6, 132.9, 132.5, 130.2, 126.3, 126.1, 125.8, 125.2, 123.9, 123.2, 116.1, 113.3, 78.4, 35.6, 27.8, 22.3, 19.7, 13.8; IR (neat) 2933, 2864, 1784, 1458, 1380, 1221, 1160, 832, 777, 755  $\text{cm}^{-1}$  HRMS (EI) calcd for  $\text{C}_{18}\text{H}_{19}\text{O}_2\text{F}_3$ : 324.1337  $[\text{M}]^+$ ; found: 324.1327.

## References:

- (1) Roberto, F.; Kamil, M.; Andres, J. *J. Am. Chem. Soc.* **2005**, *127*, 9271–9276.
- (2) Royals, E. E.; Prasad, R. N. *J. Am. Chem. Soc.* **1955**, *77*, 1696–1697.
- (3) Staley, S. W.; Dustman, C. K. *J. Am. Chem. Soc.* **1981**, *103*, 4297–4302.
- (4) Lu, S.; Xu, Z.; Bao, M.; Yamamoto, Y. *Angew. Chem. Int. Ed.* 2008, *47*, 4366–4369.

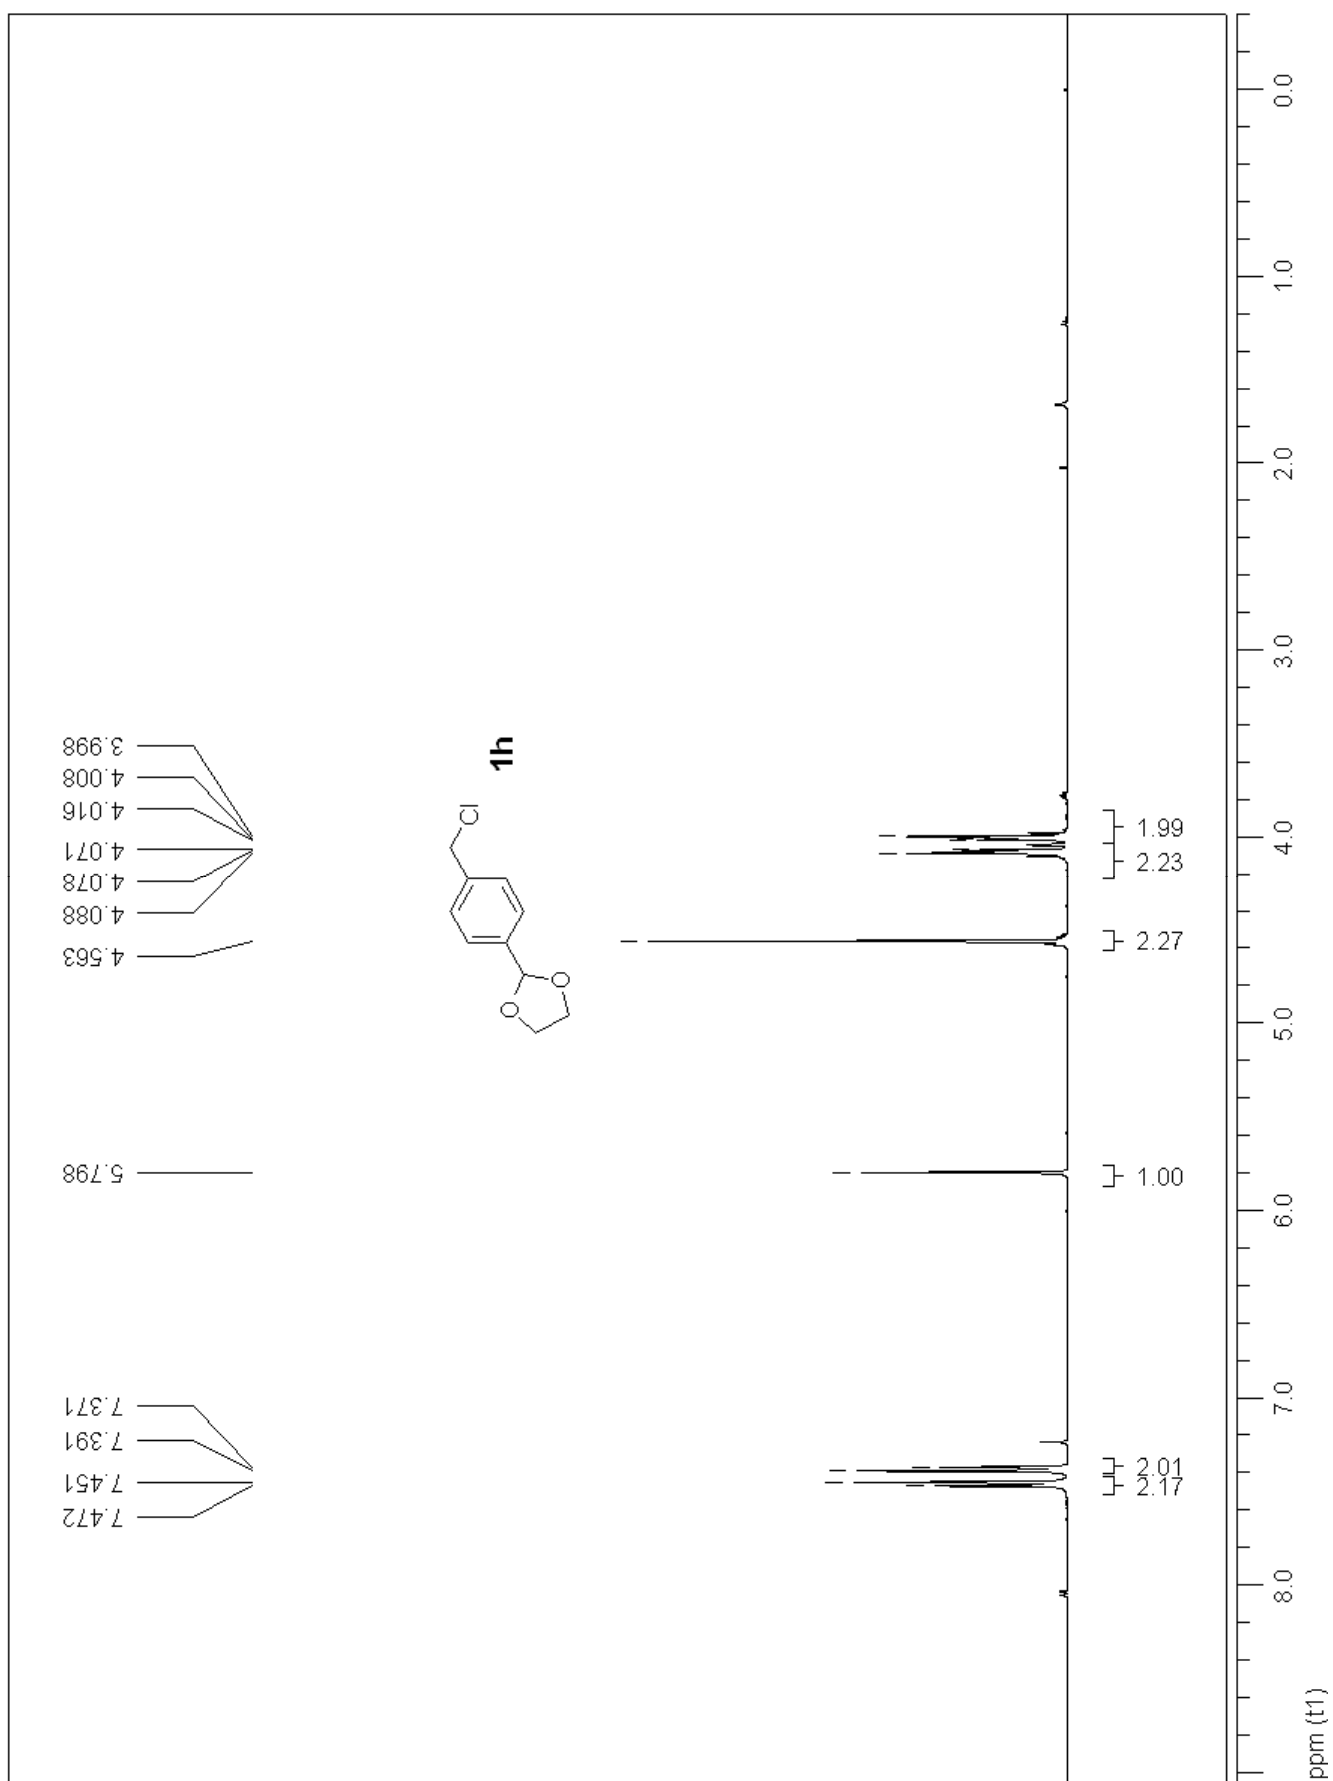

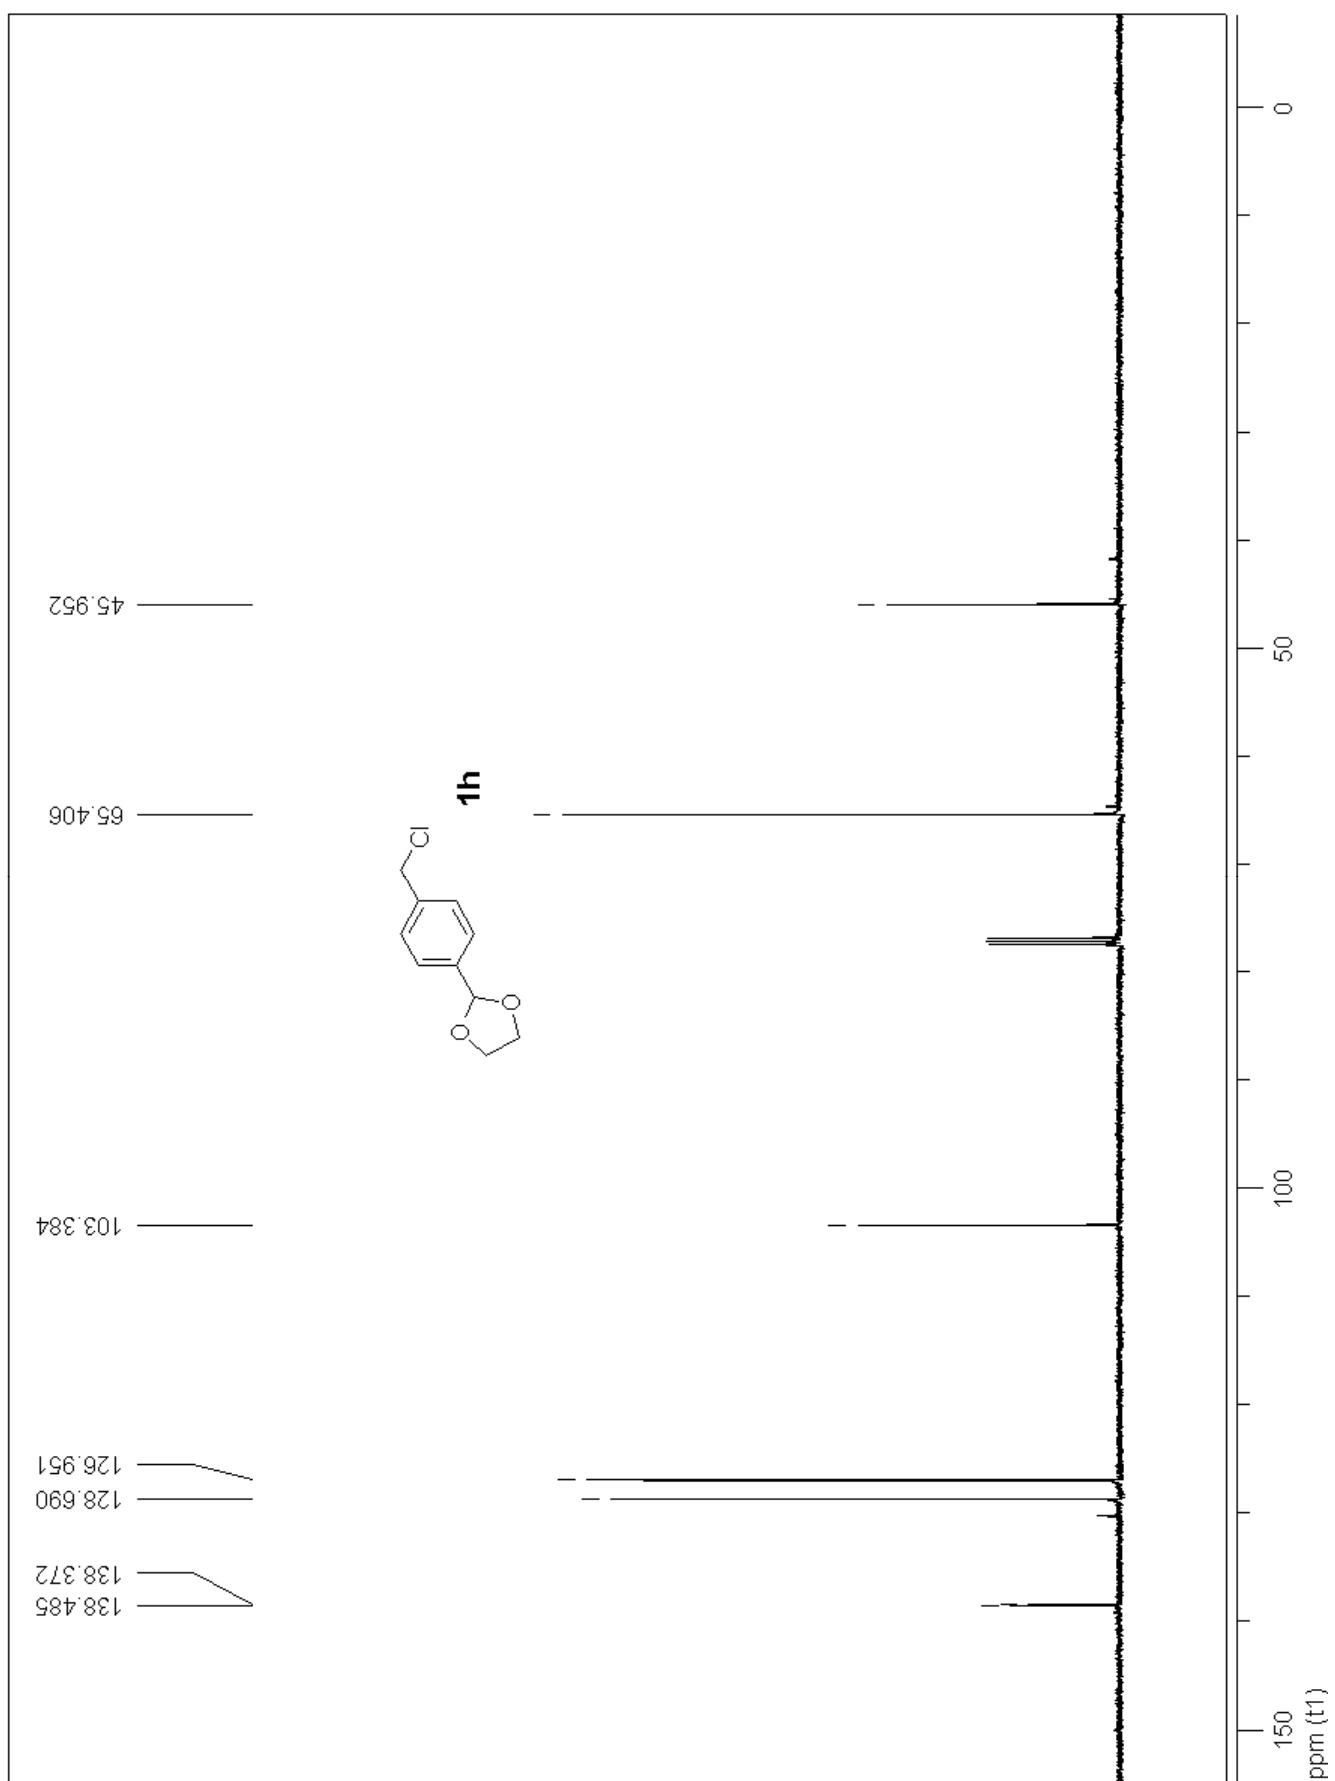



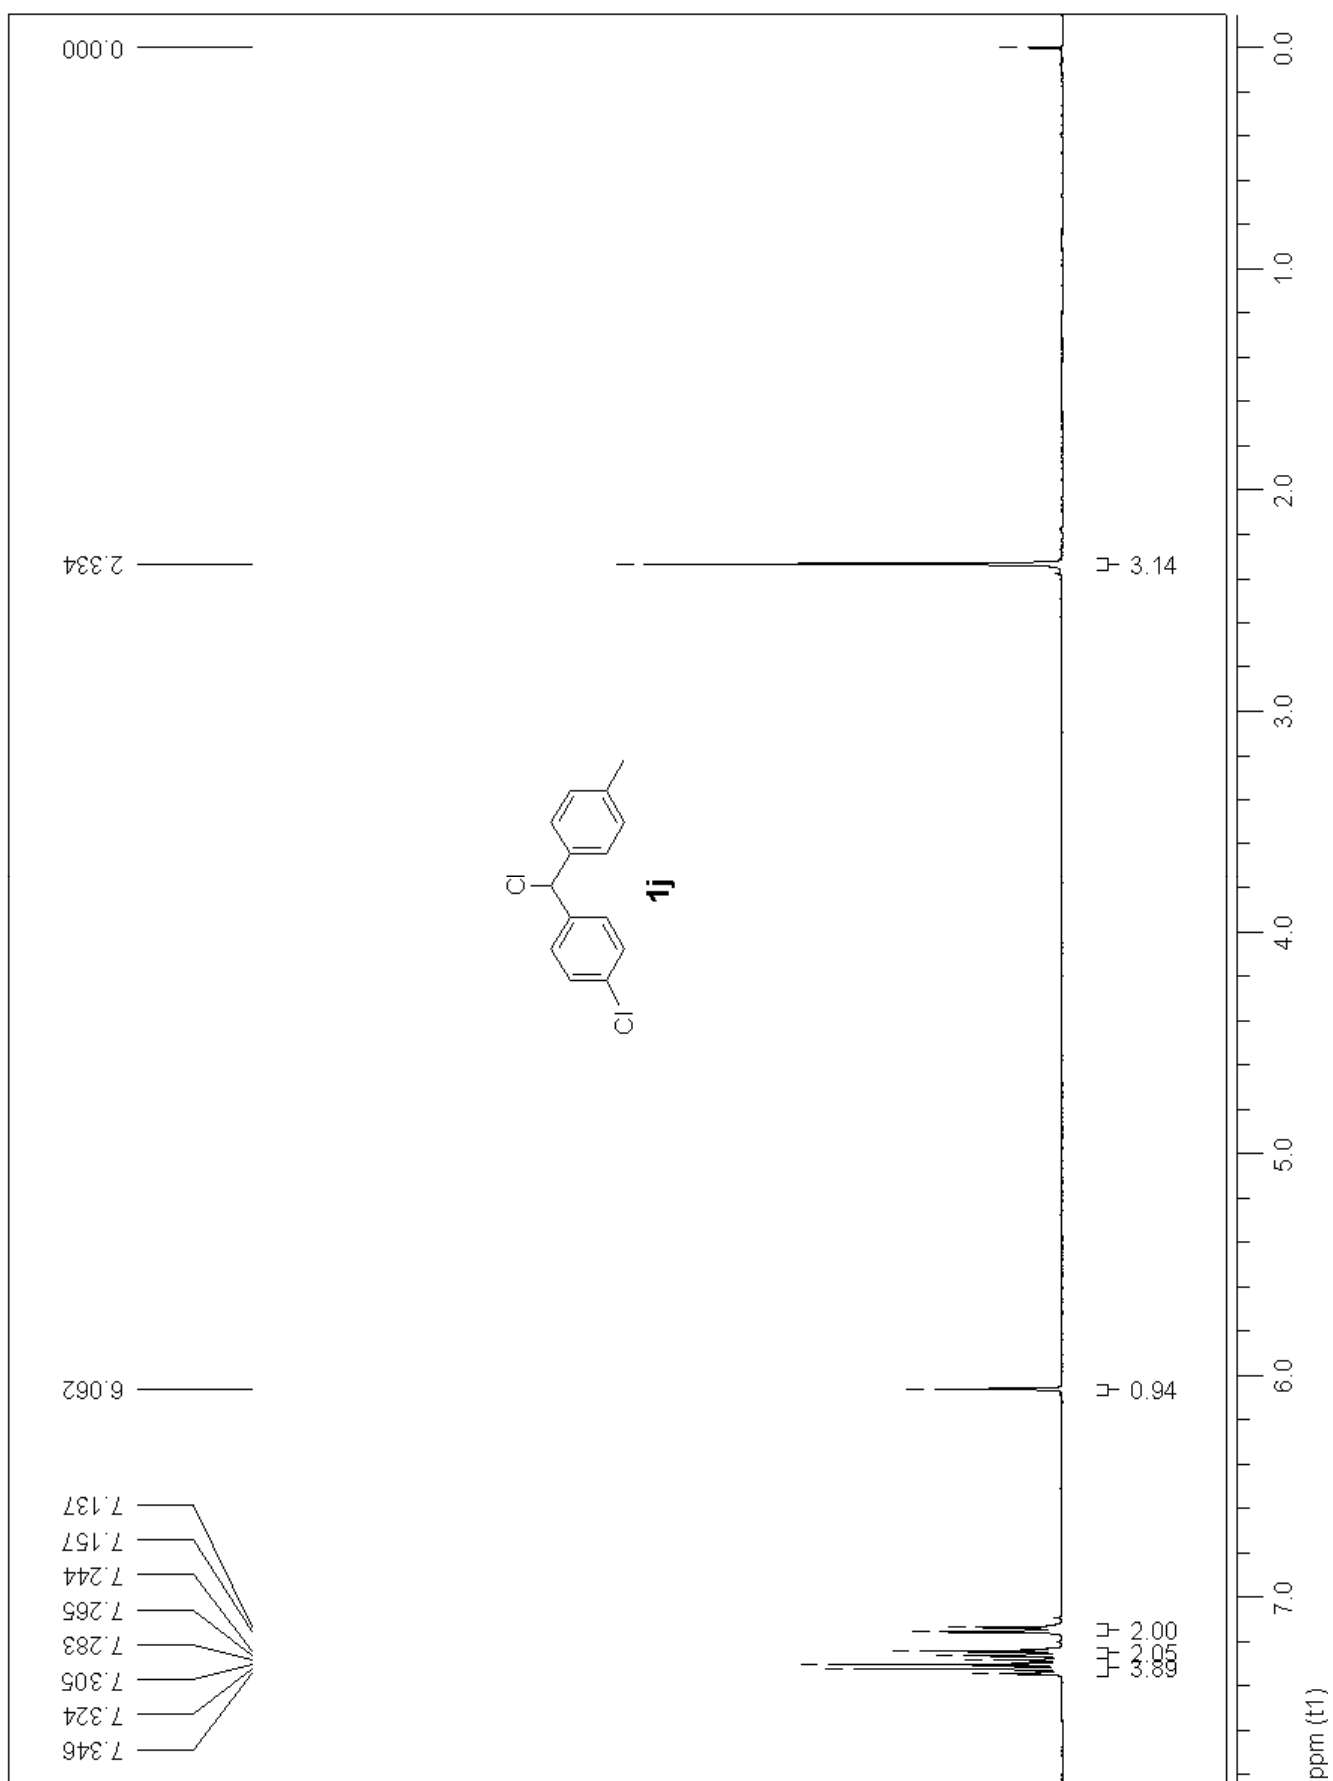

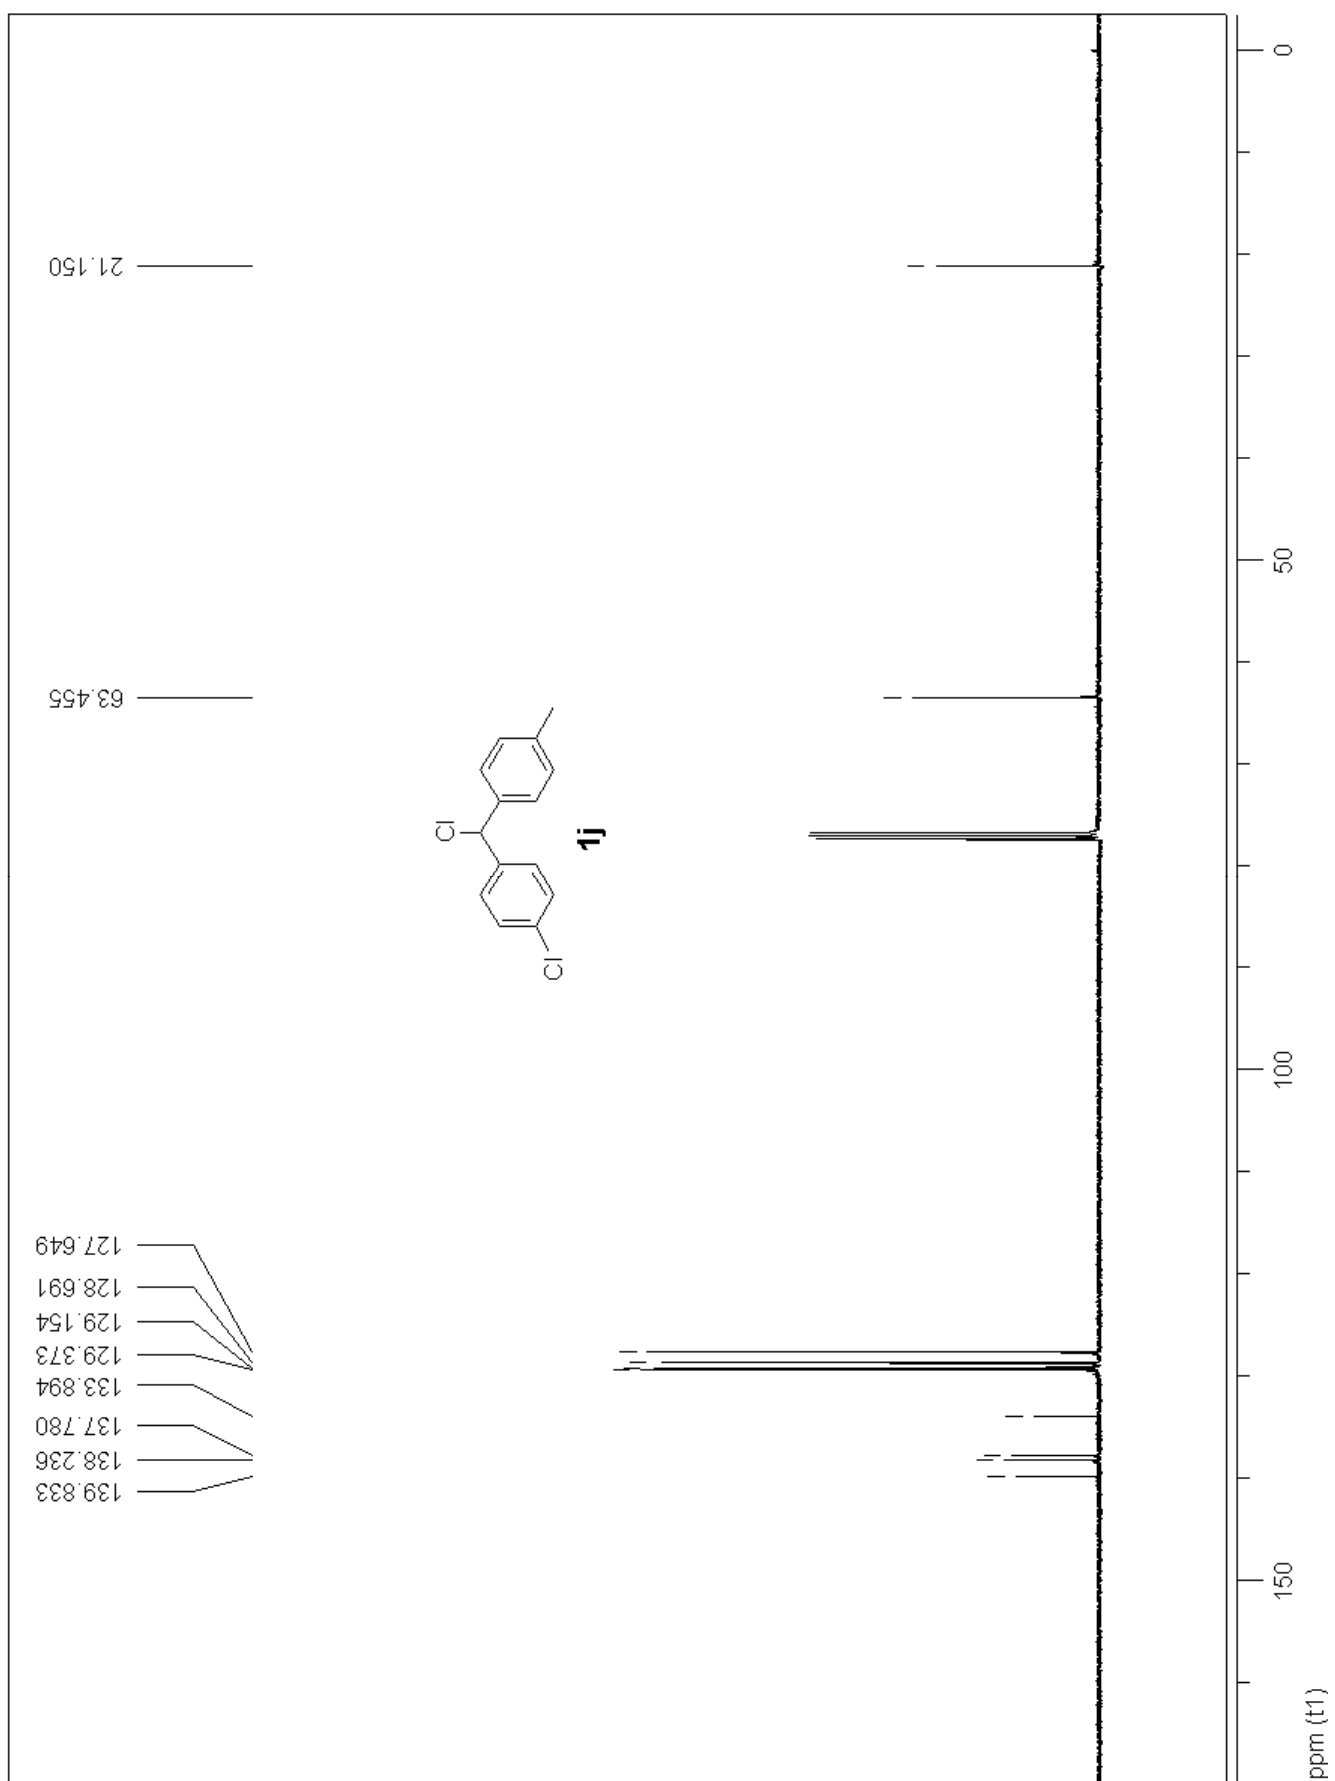

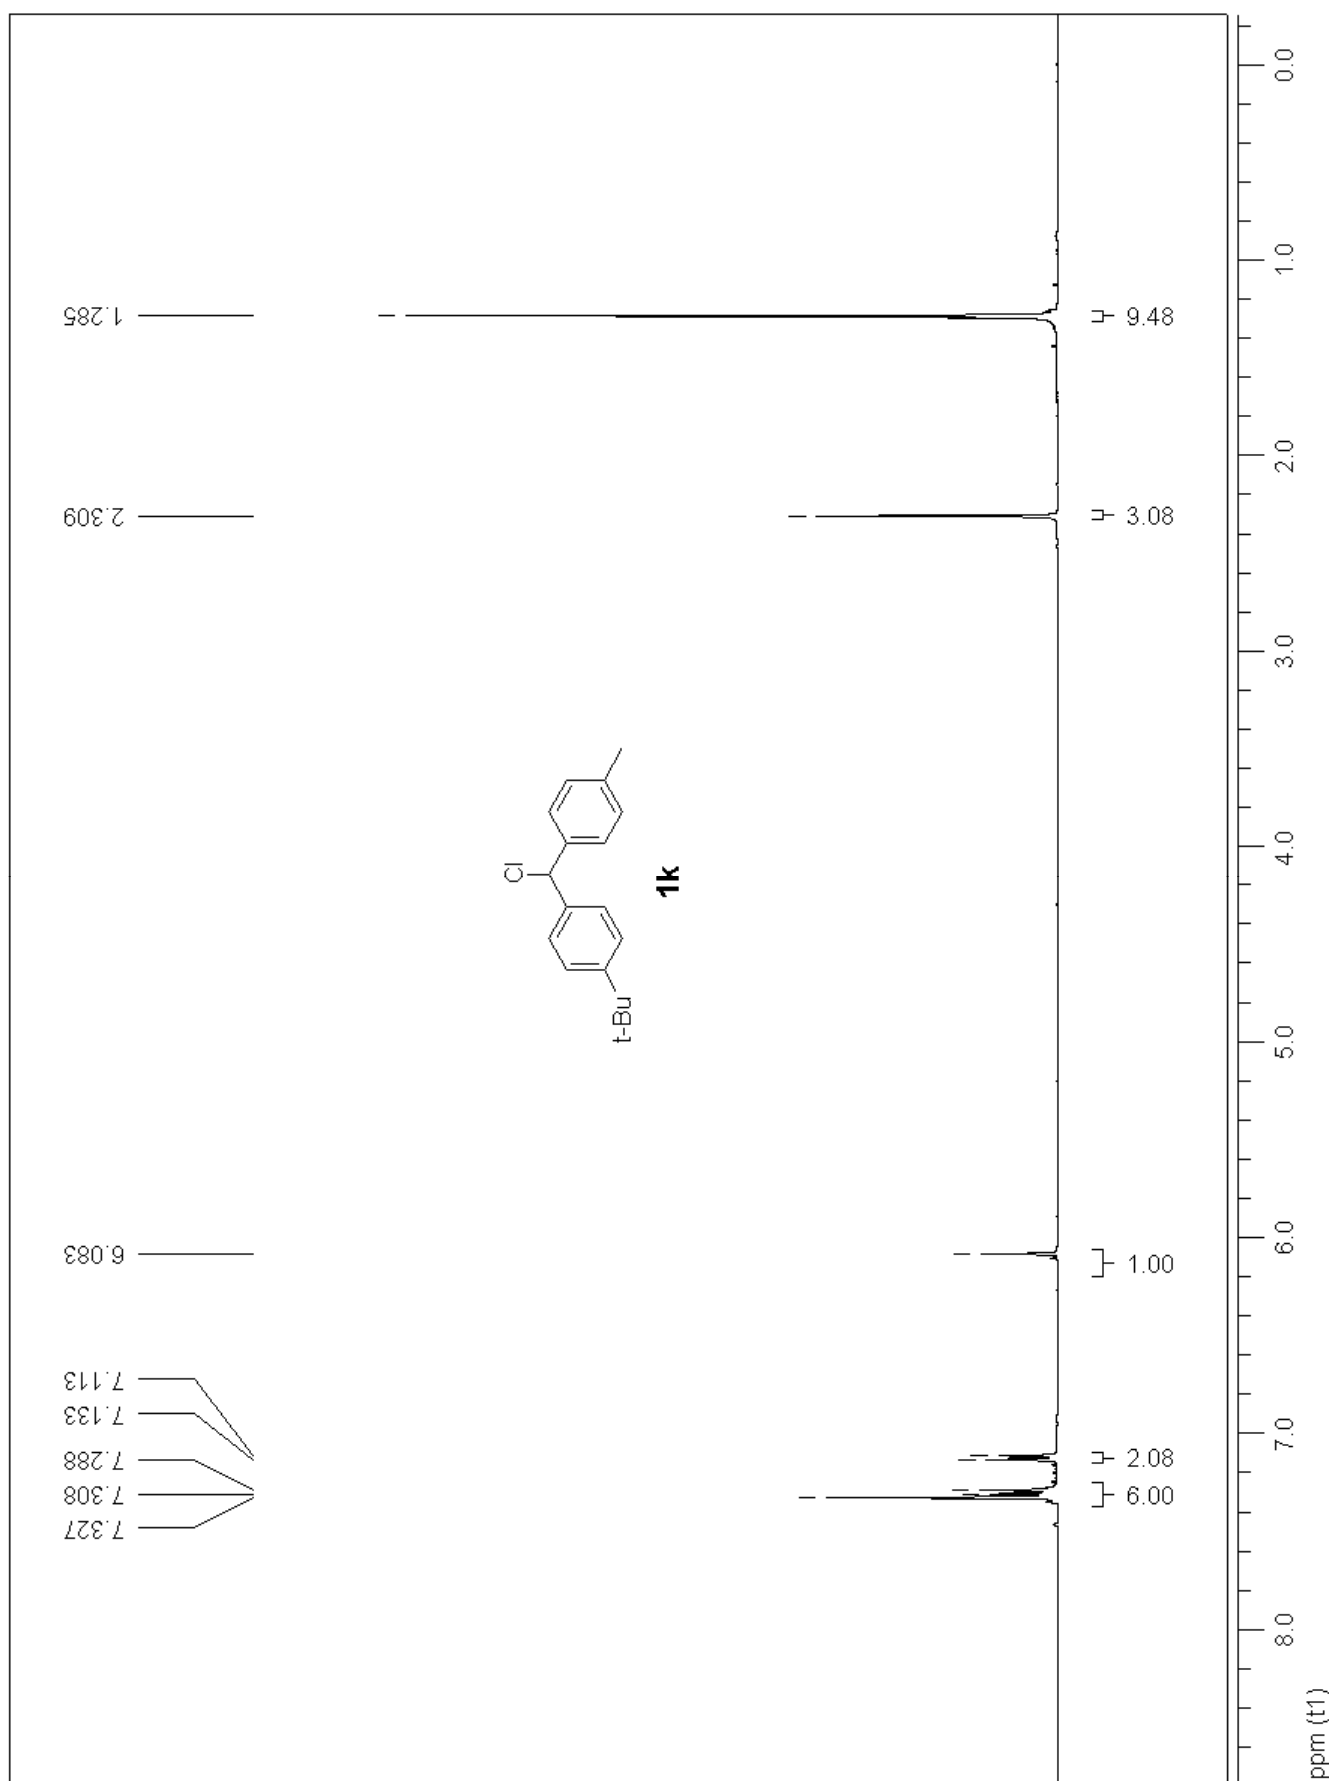

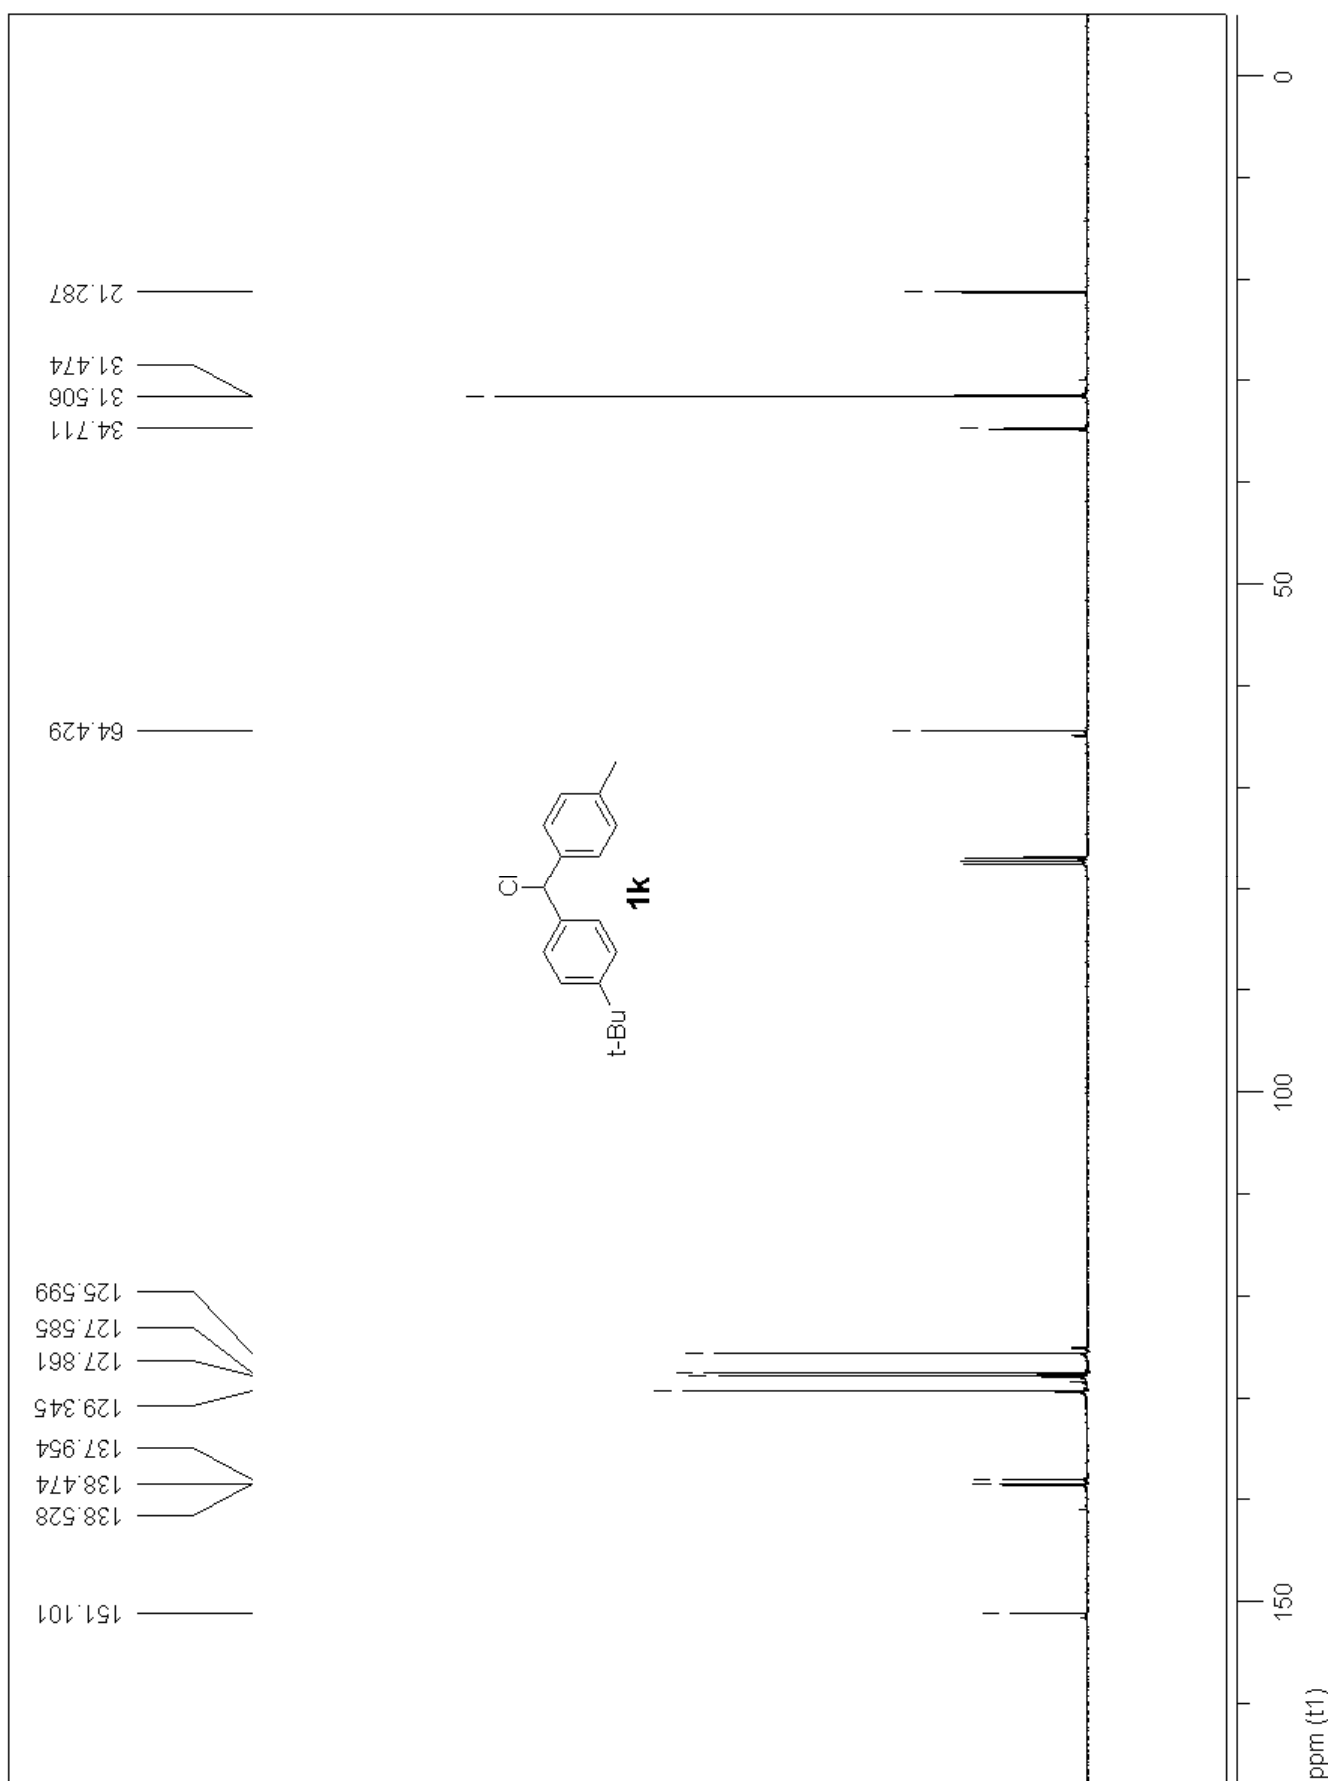

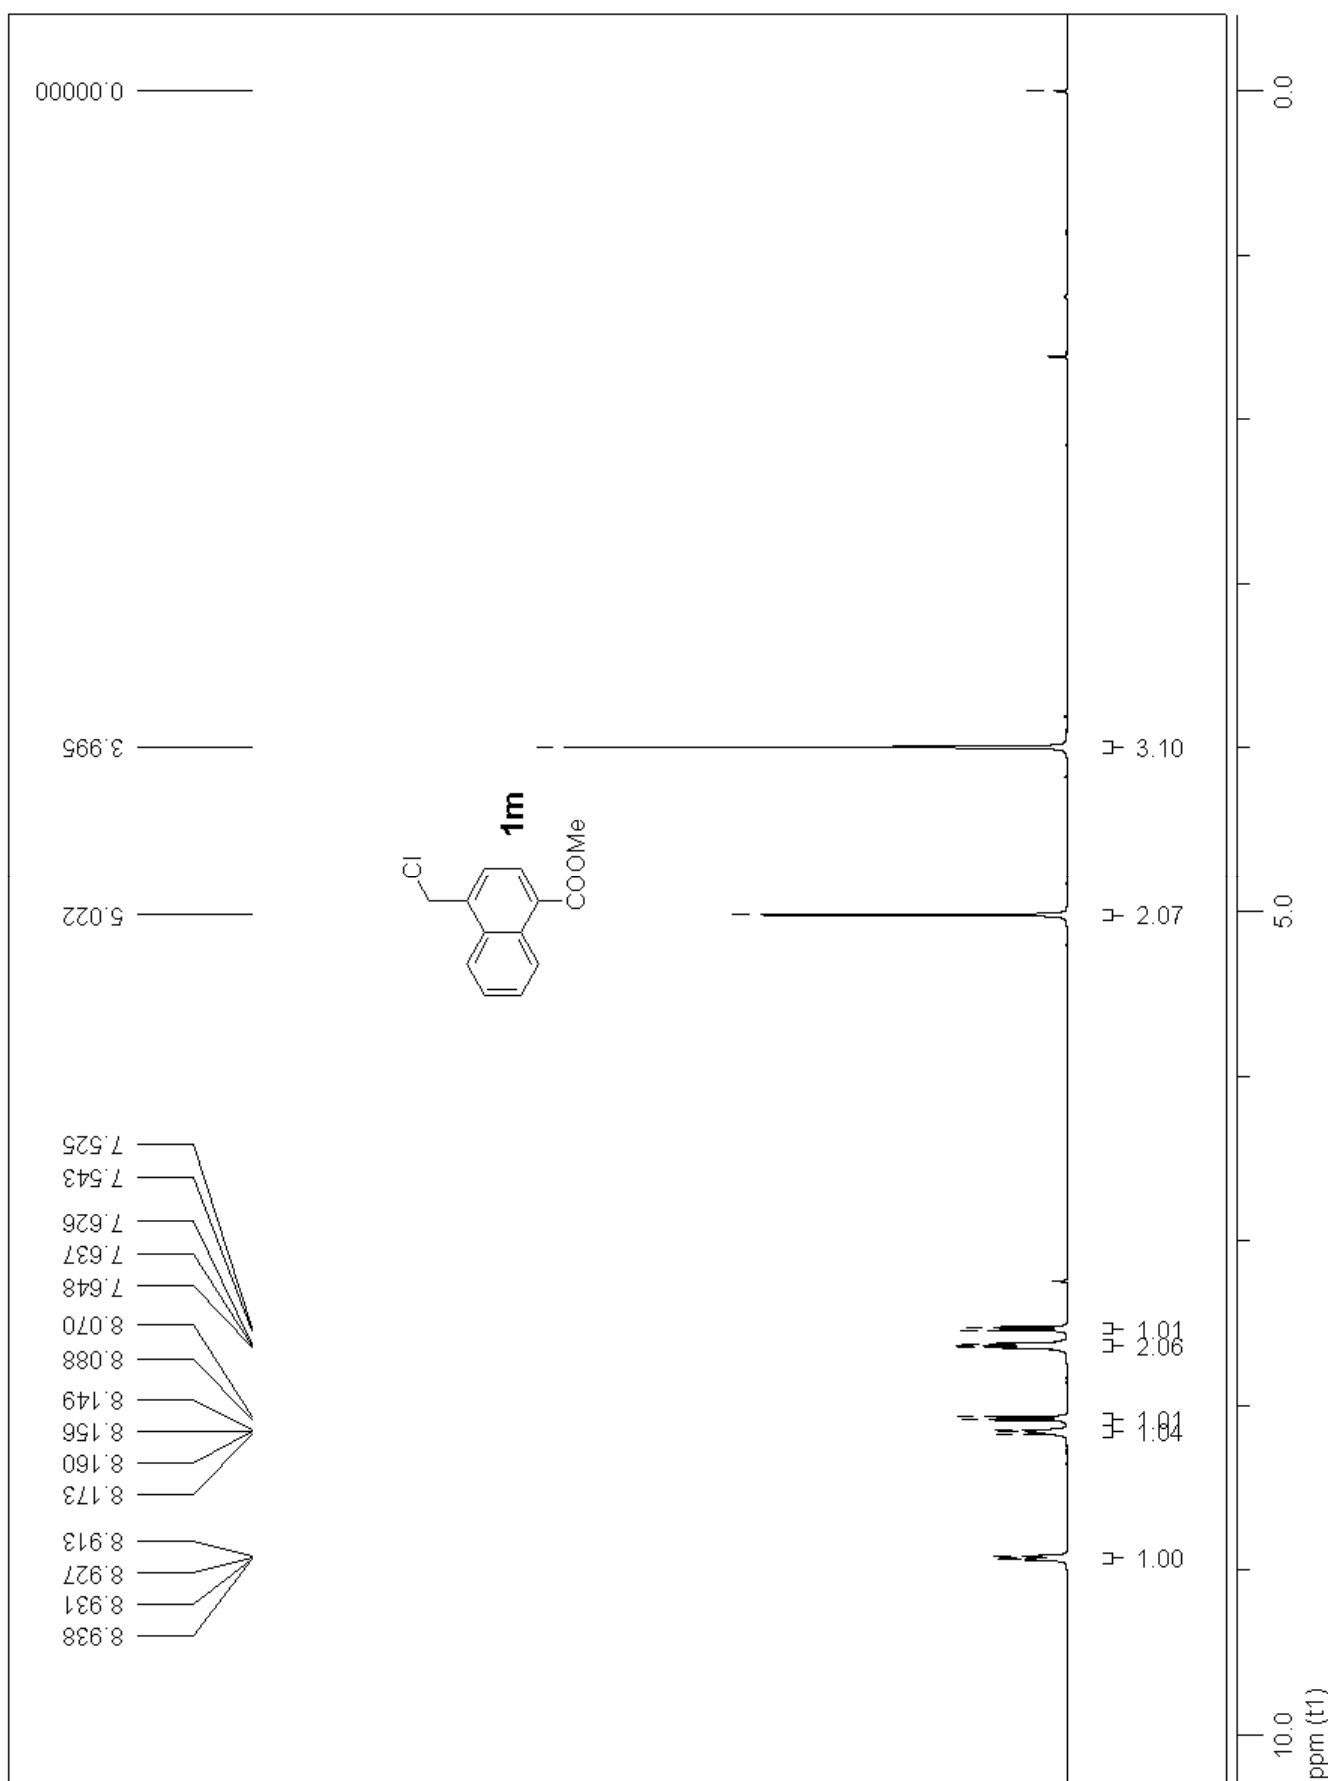

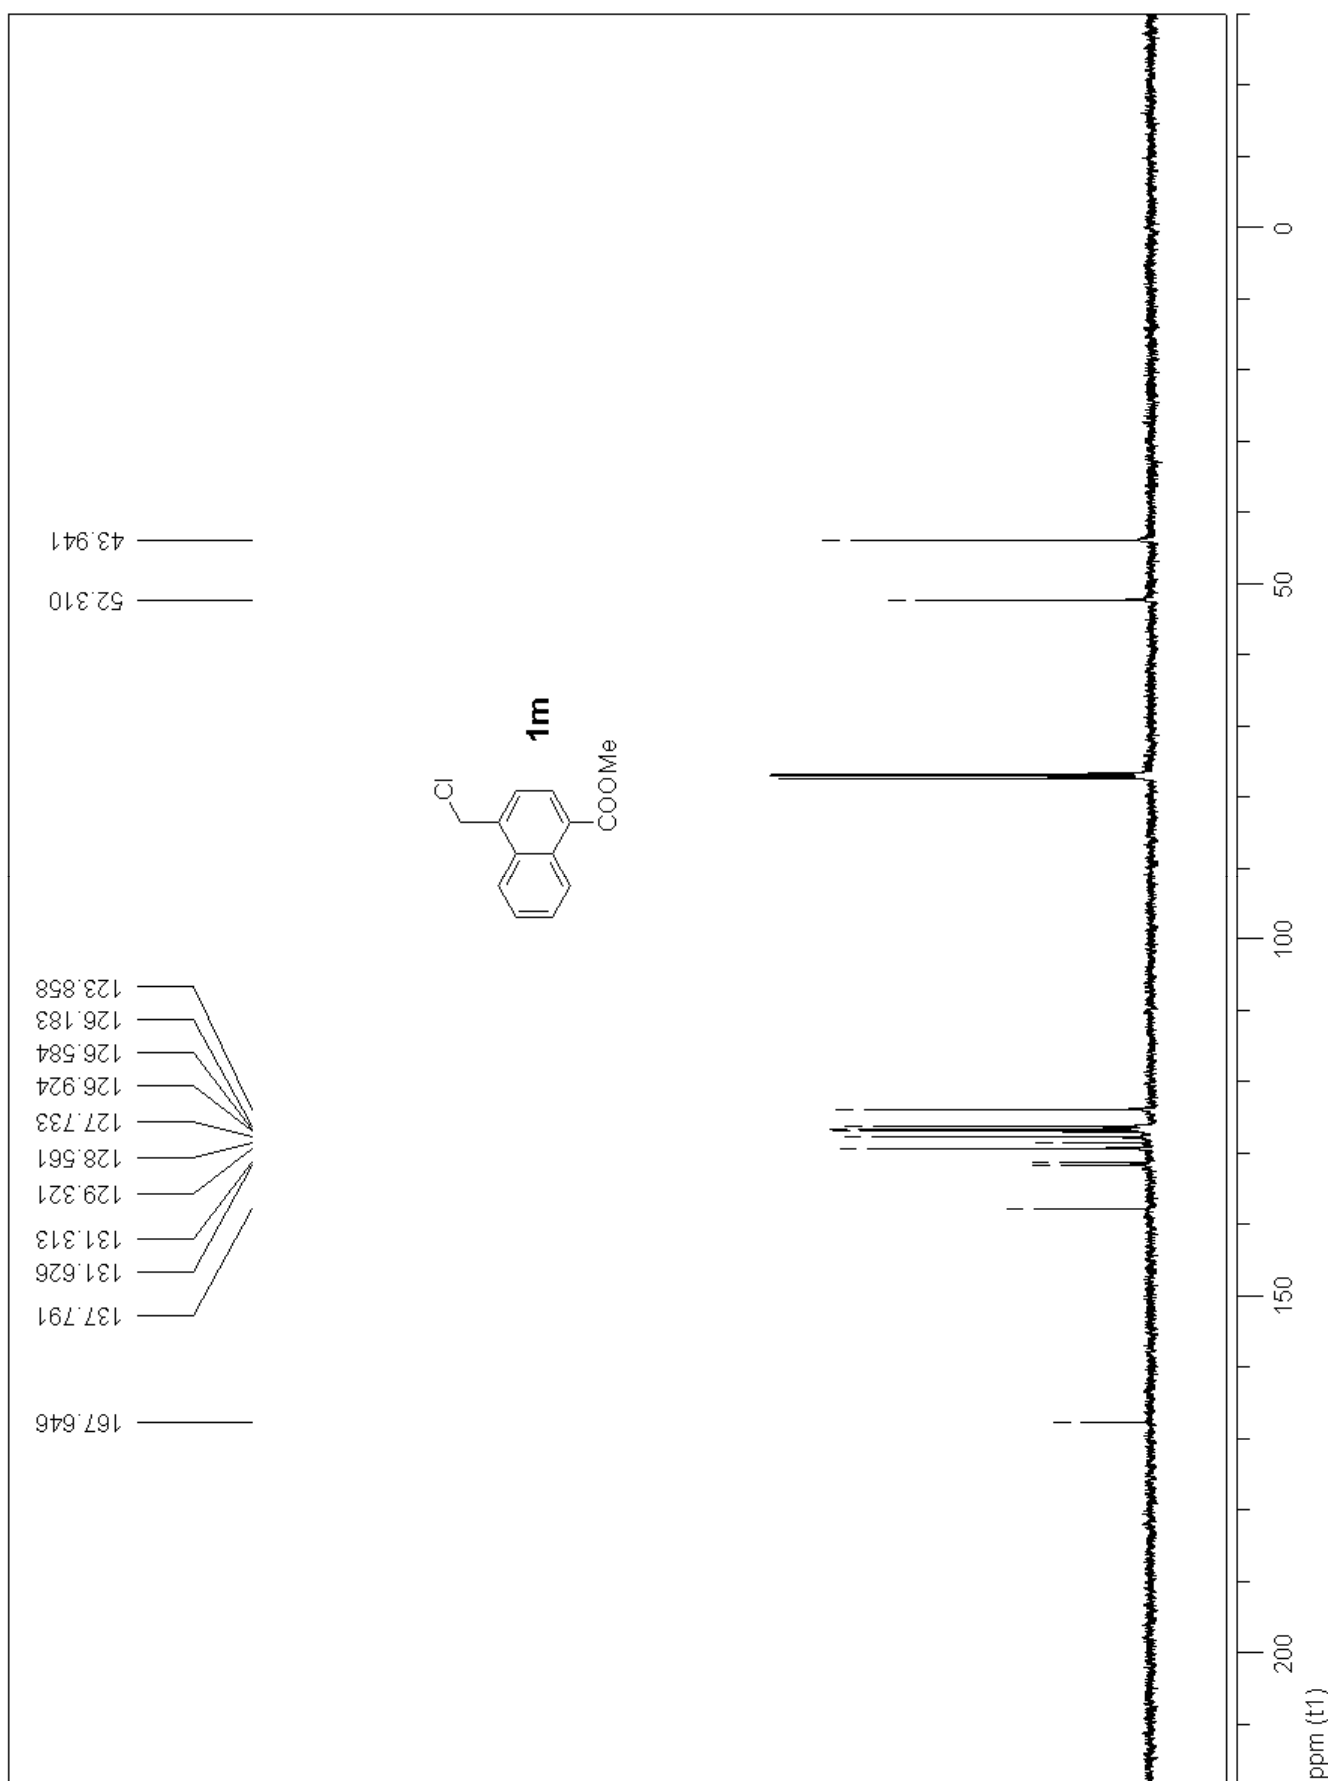

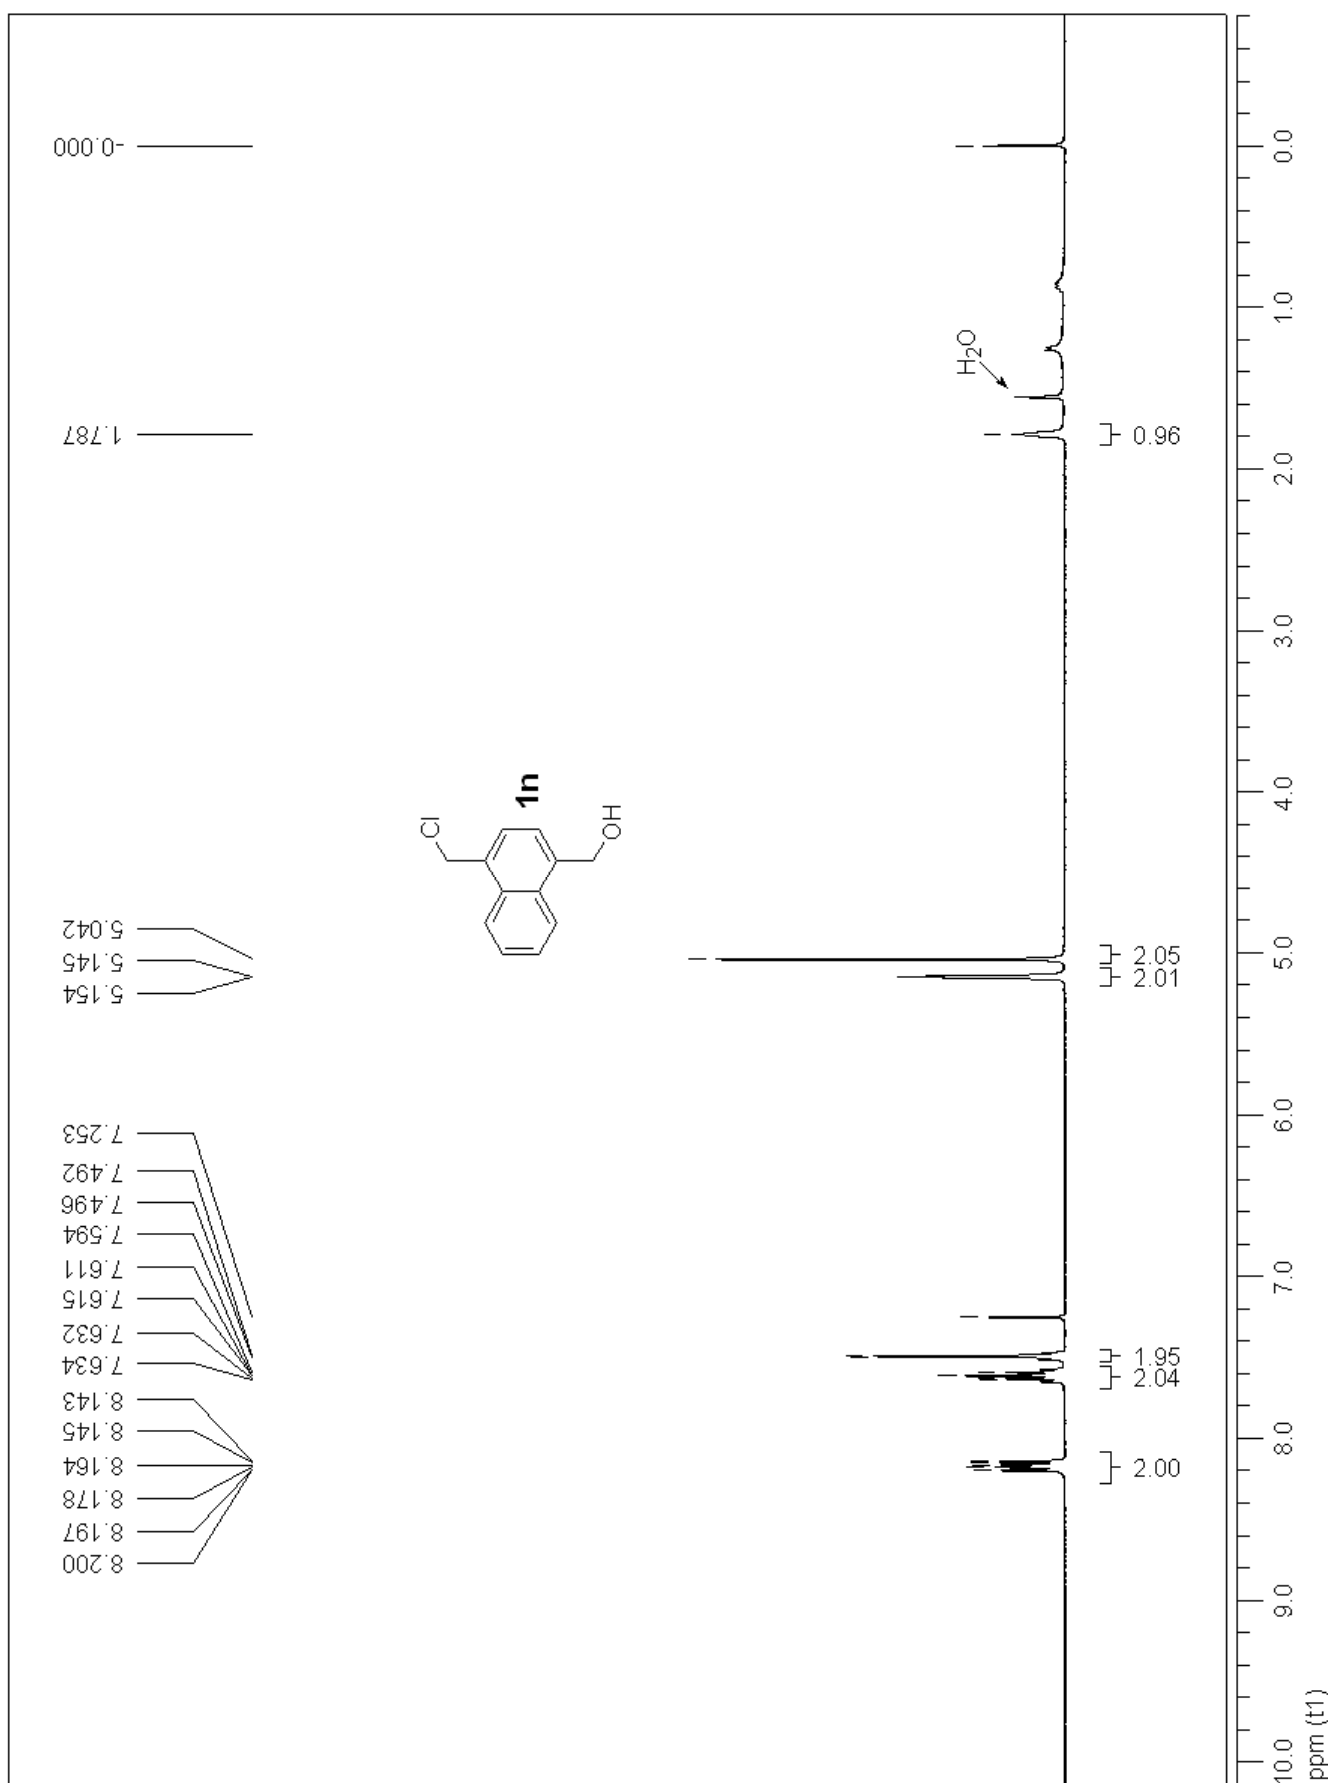

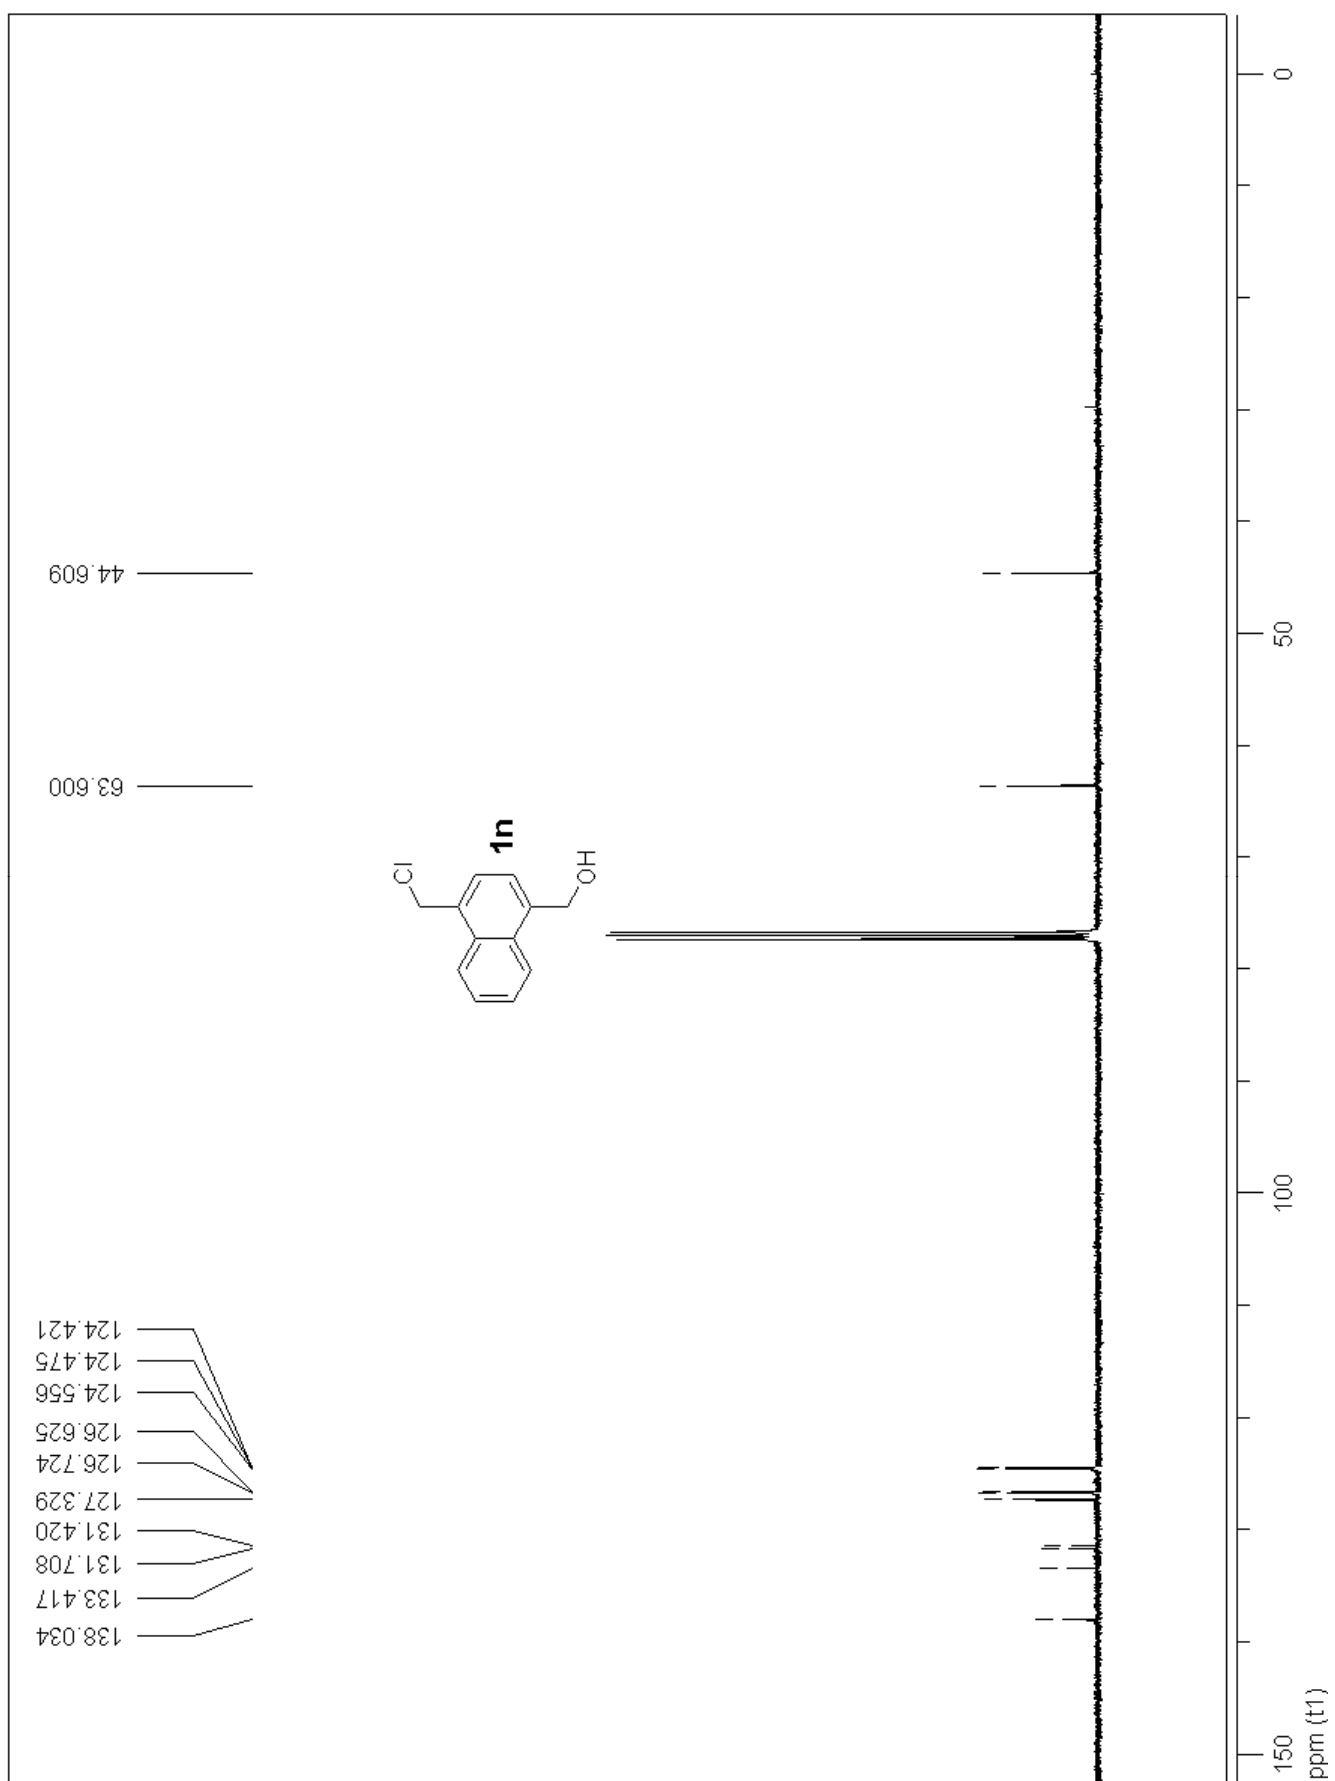



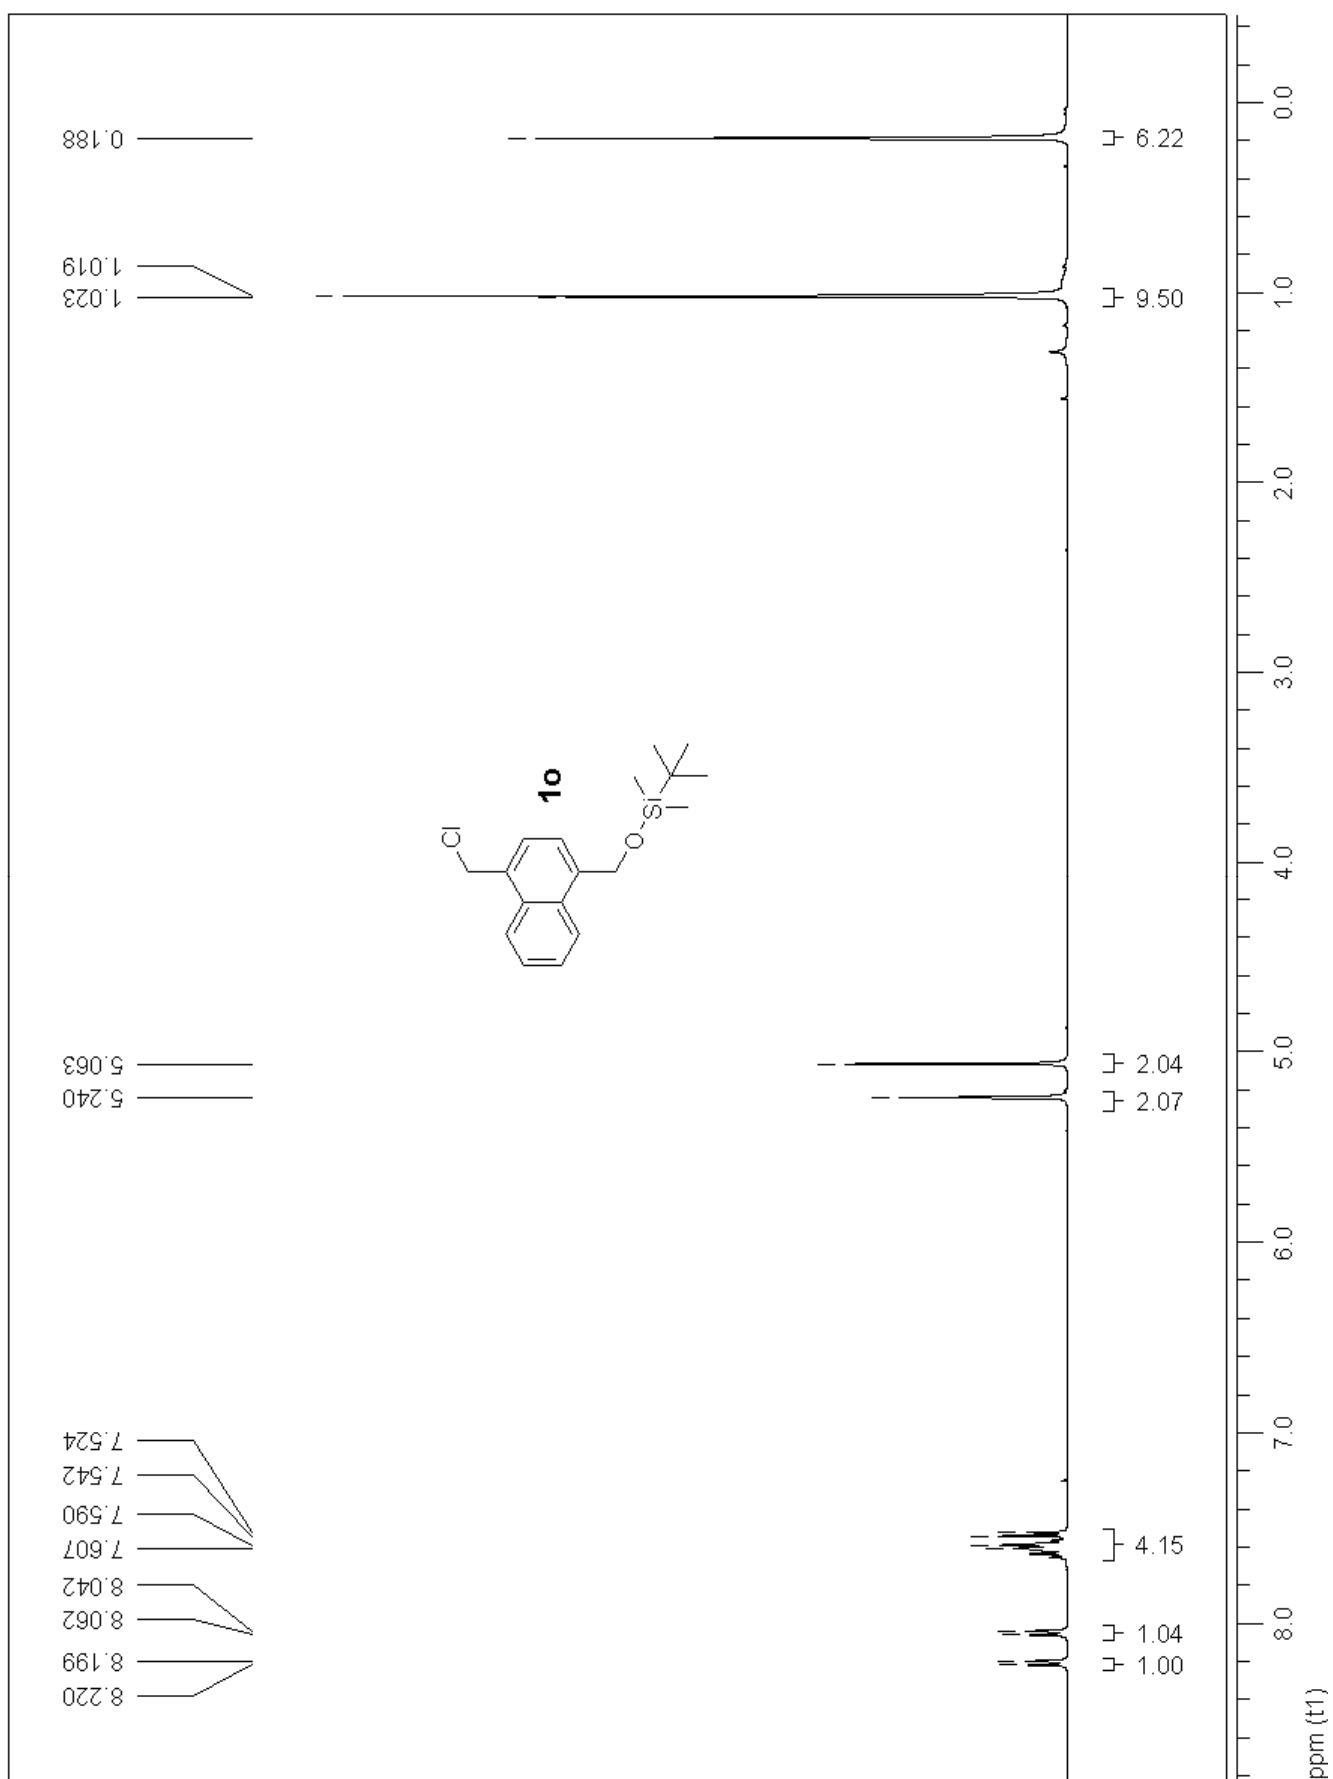

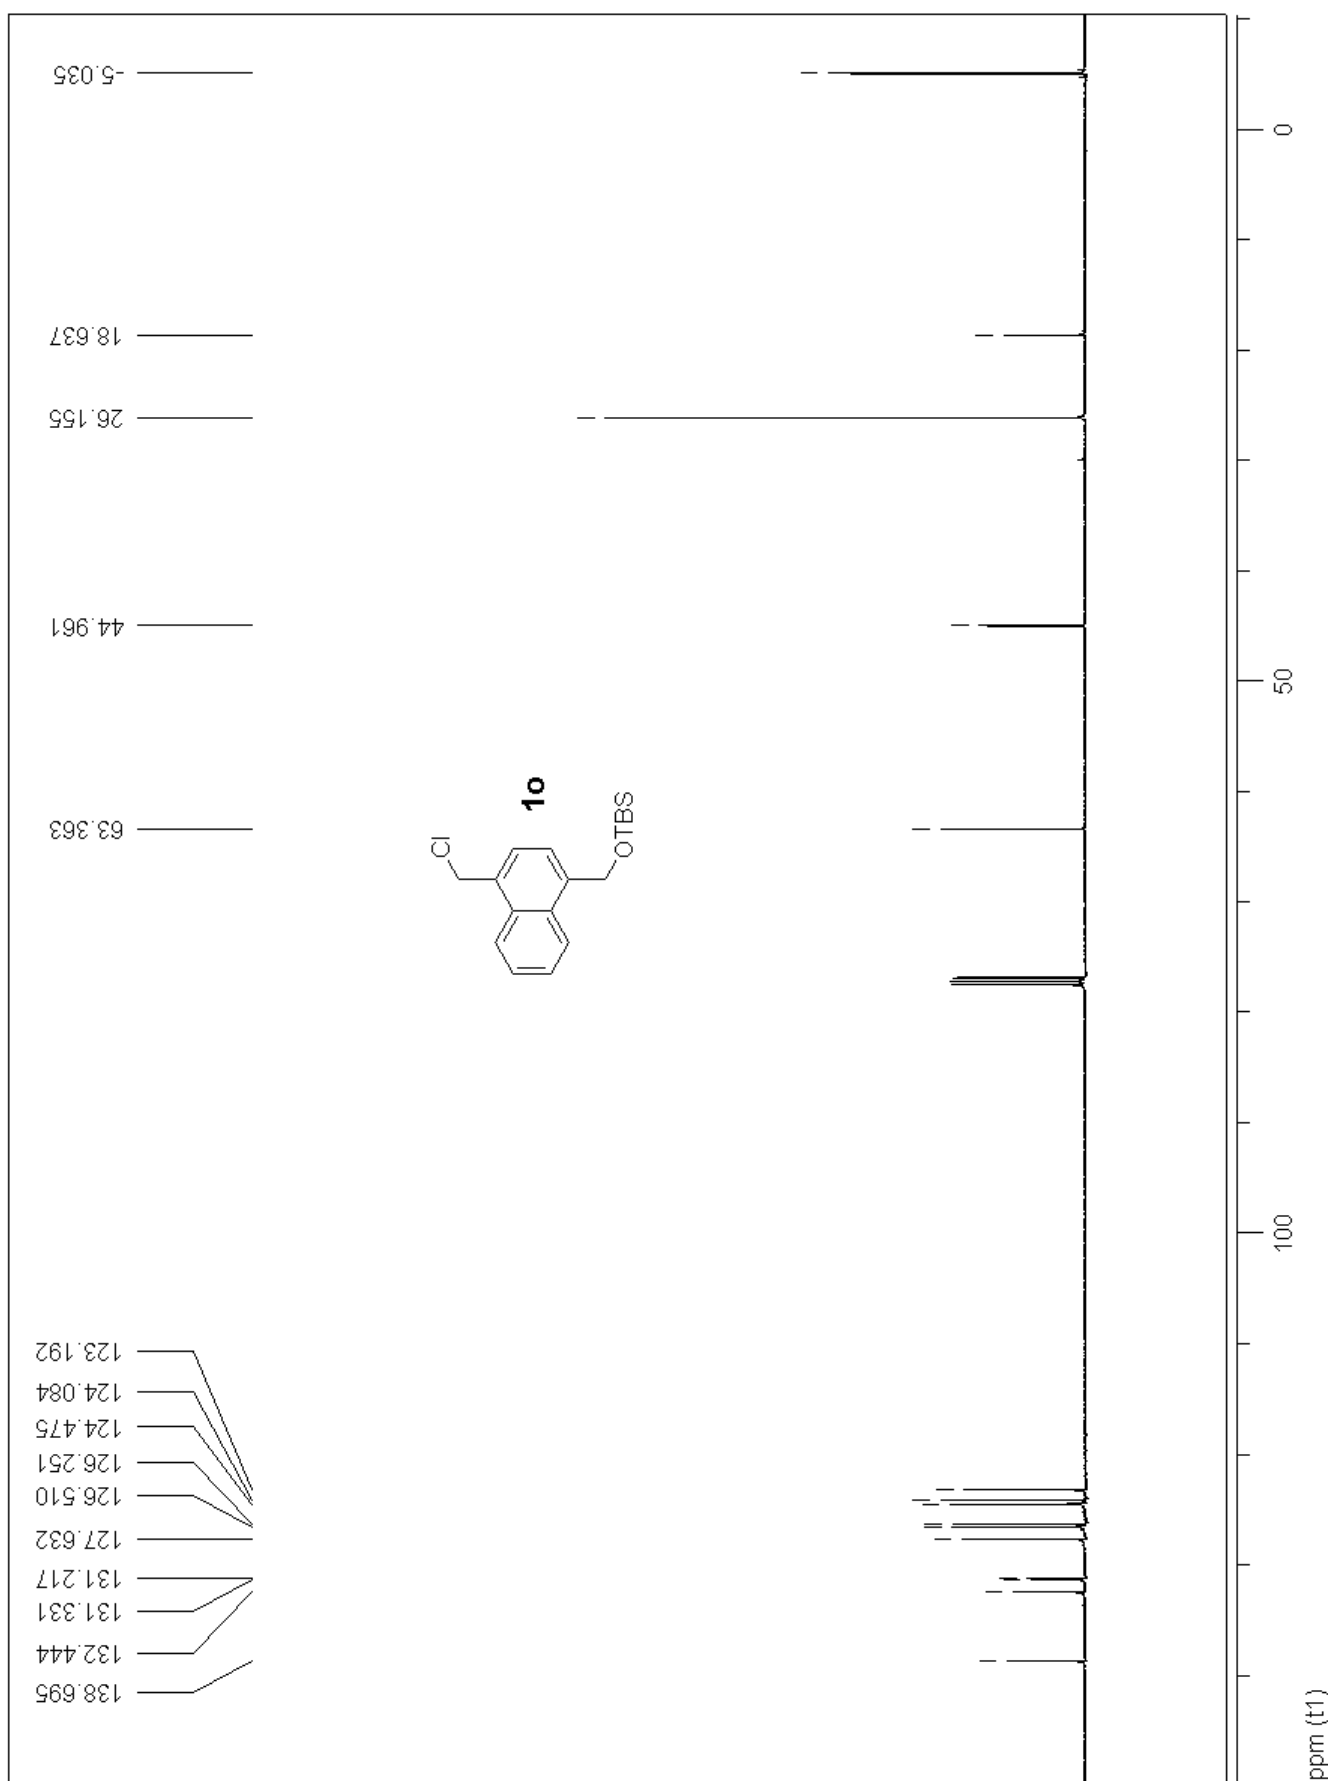

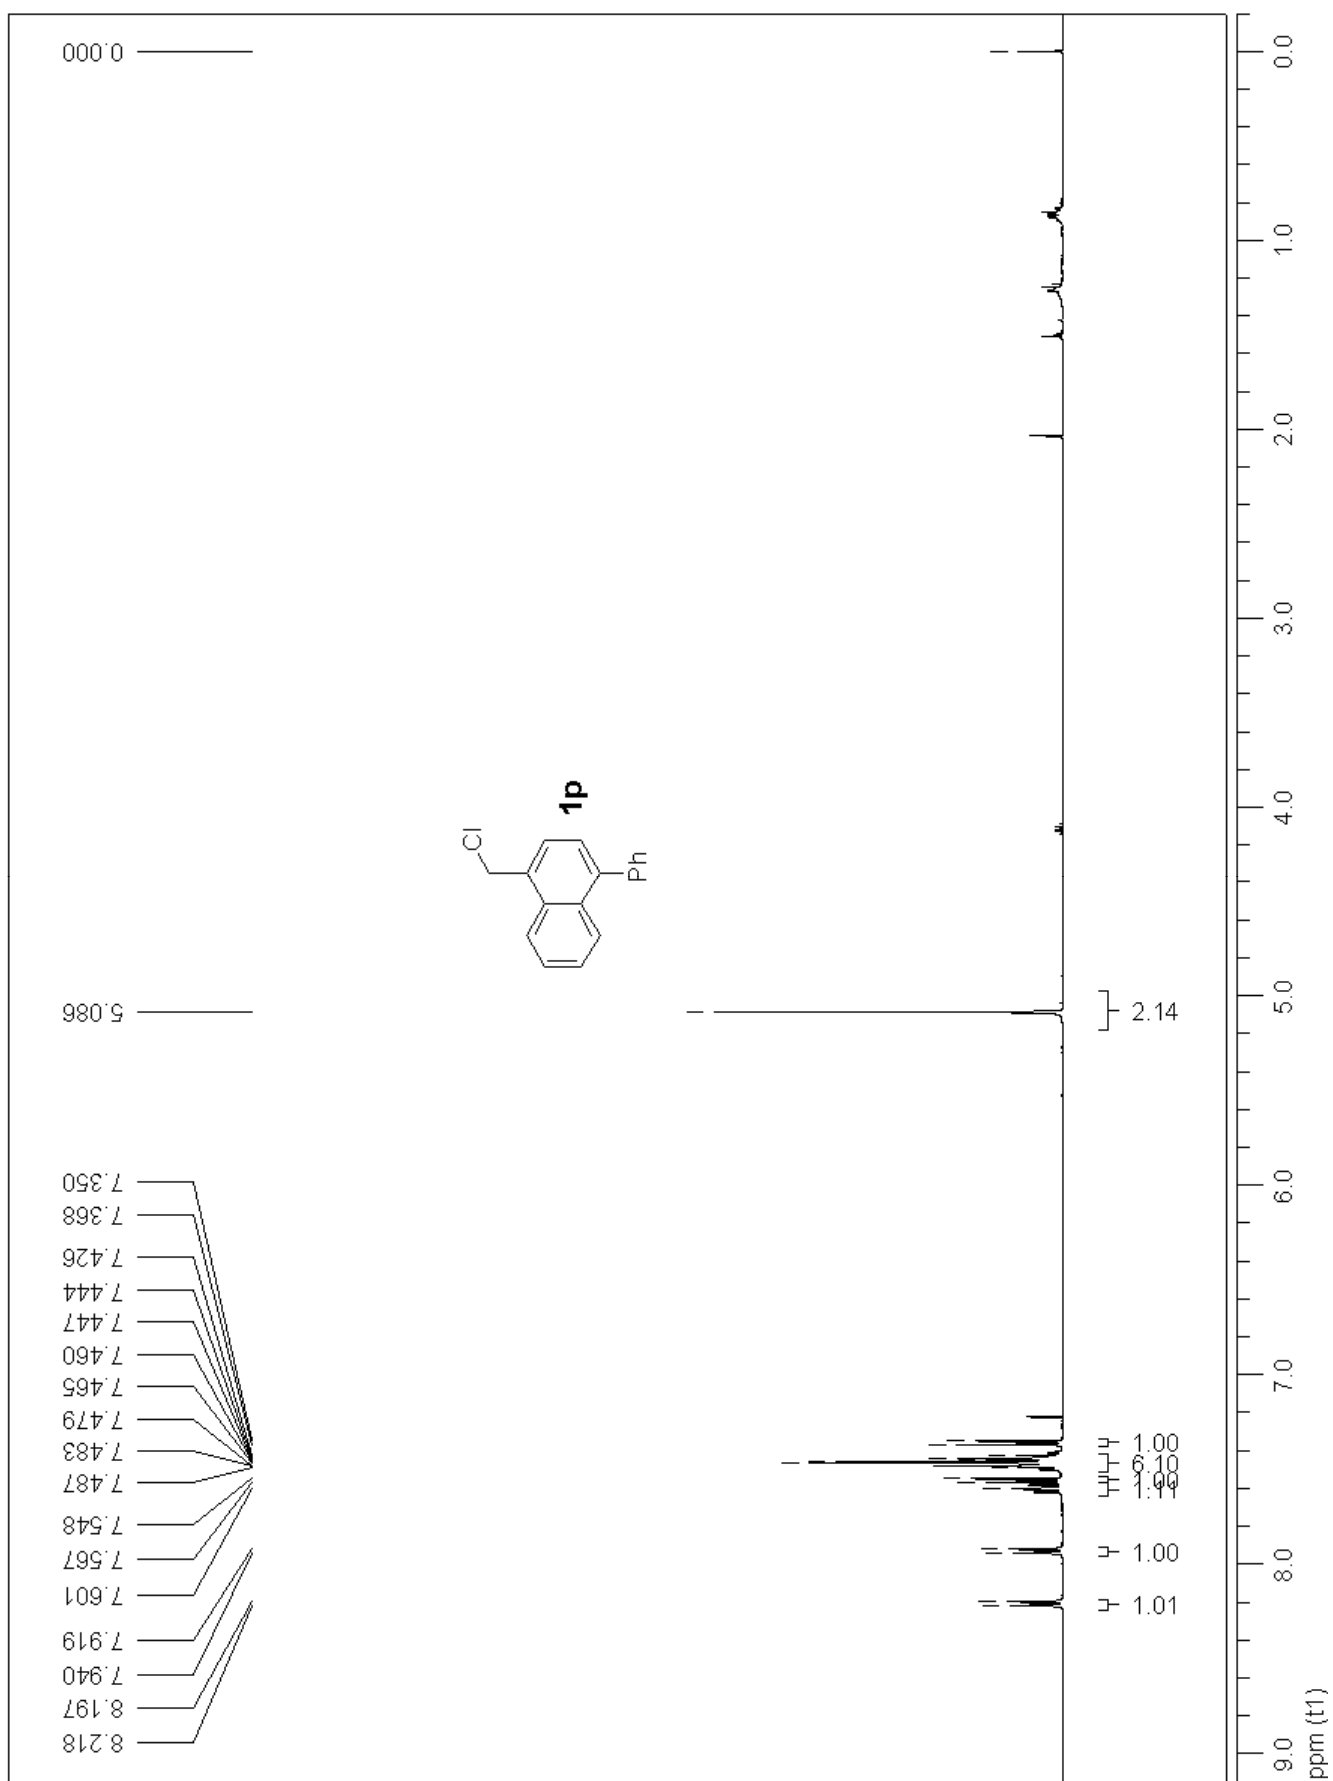

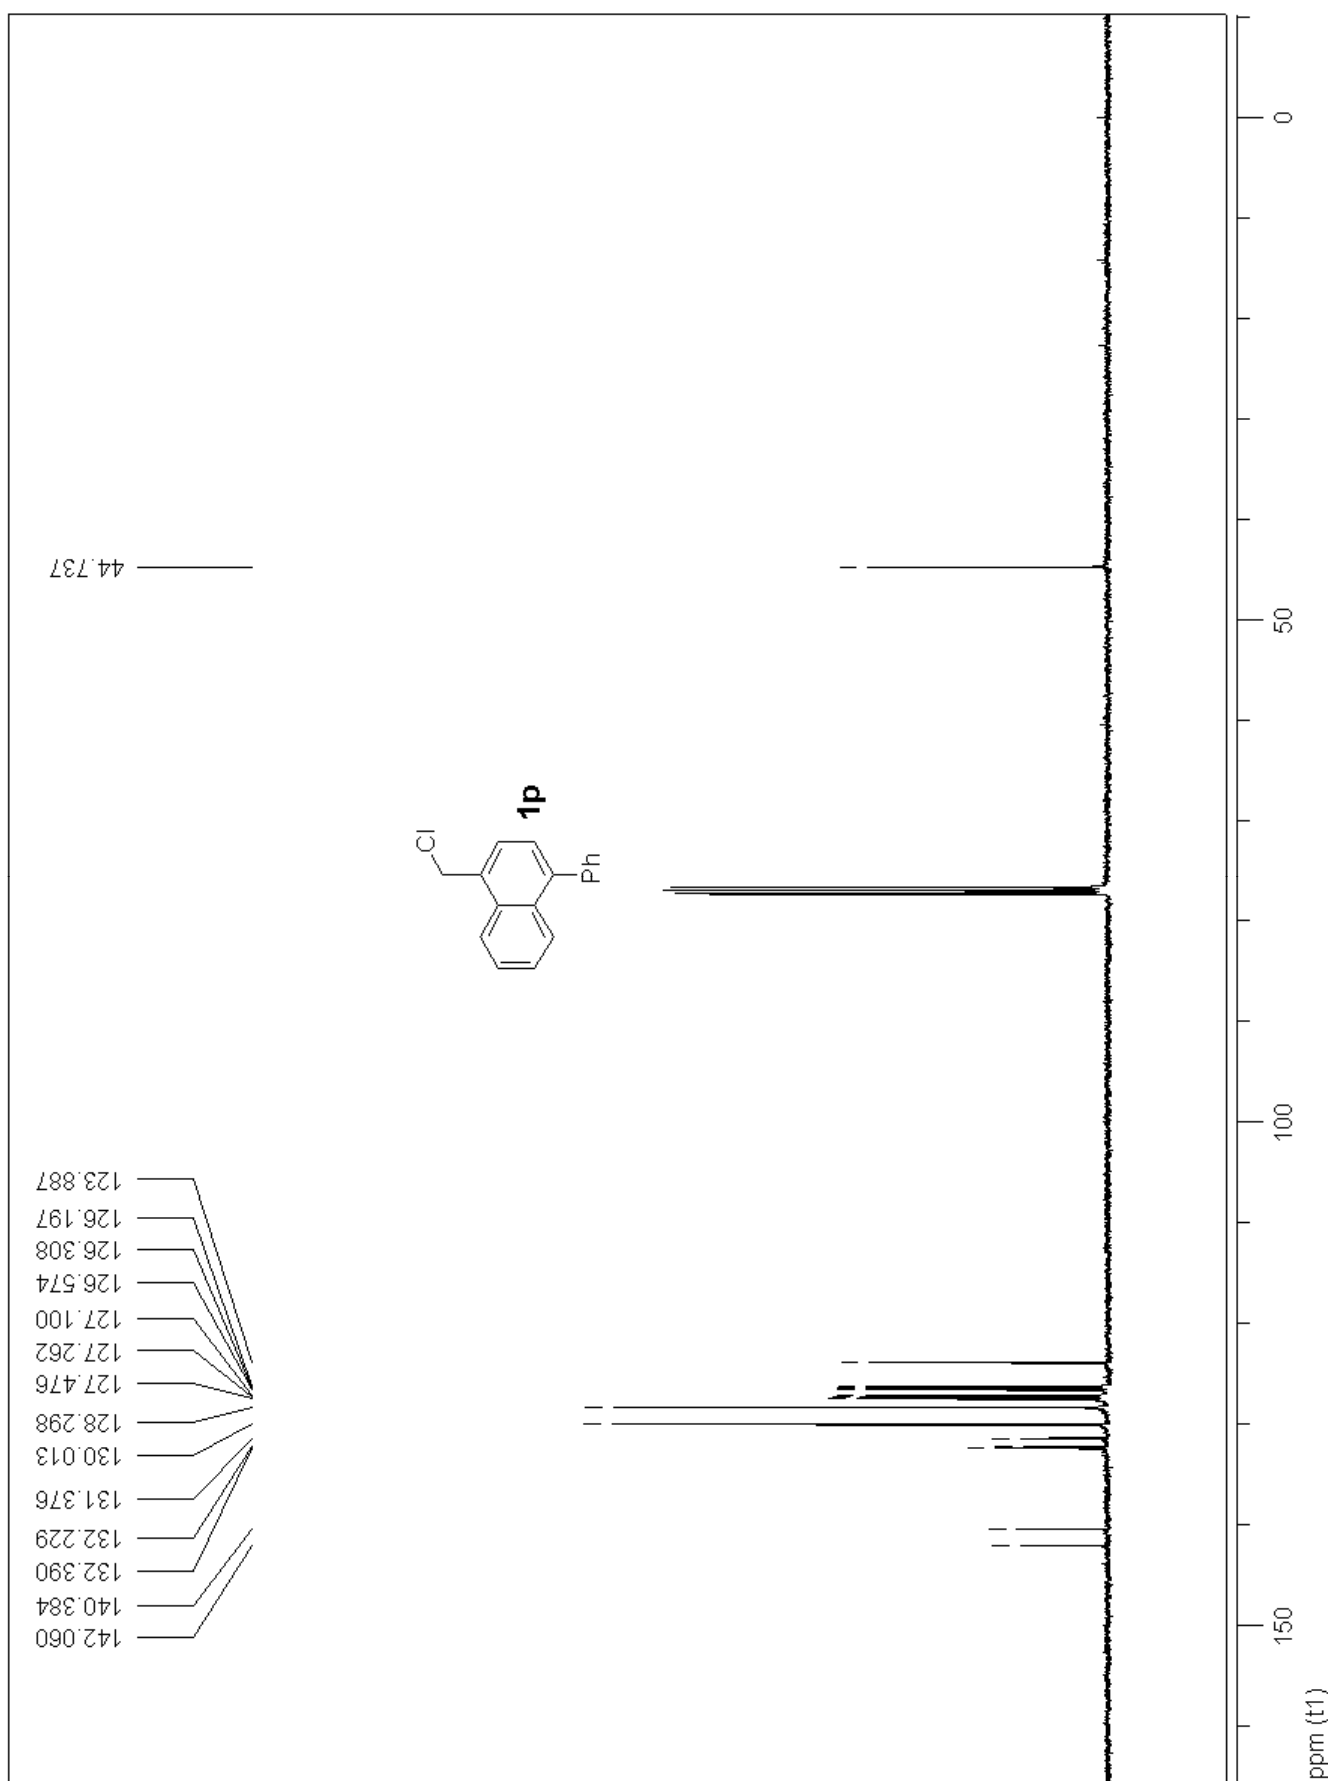

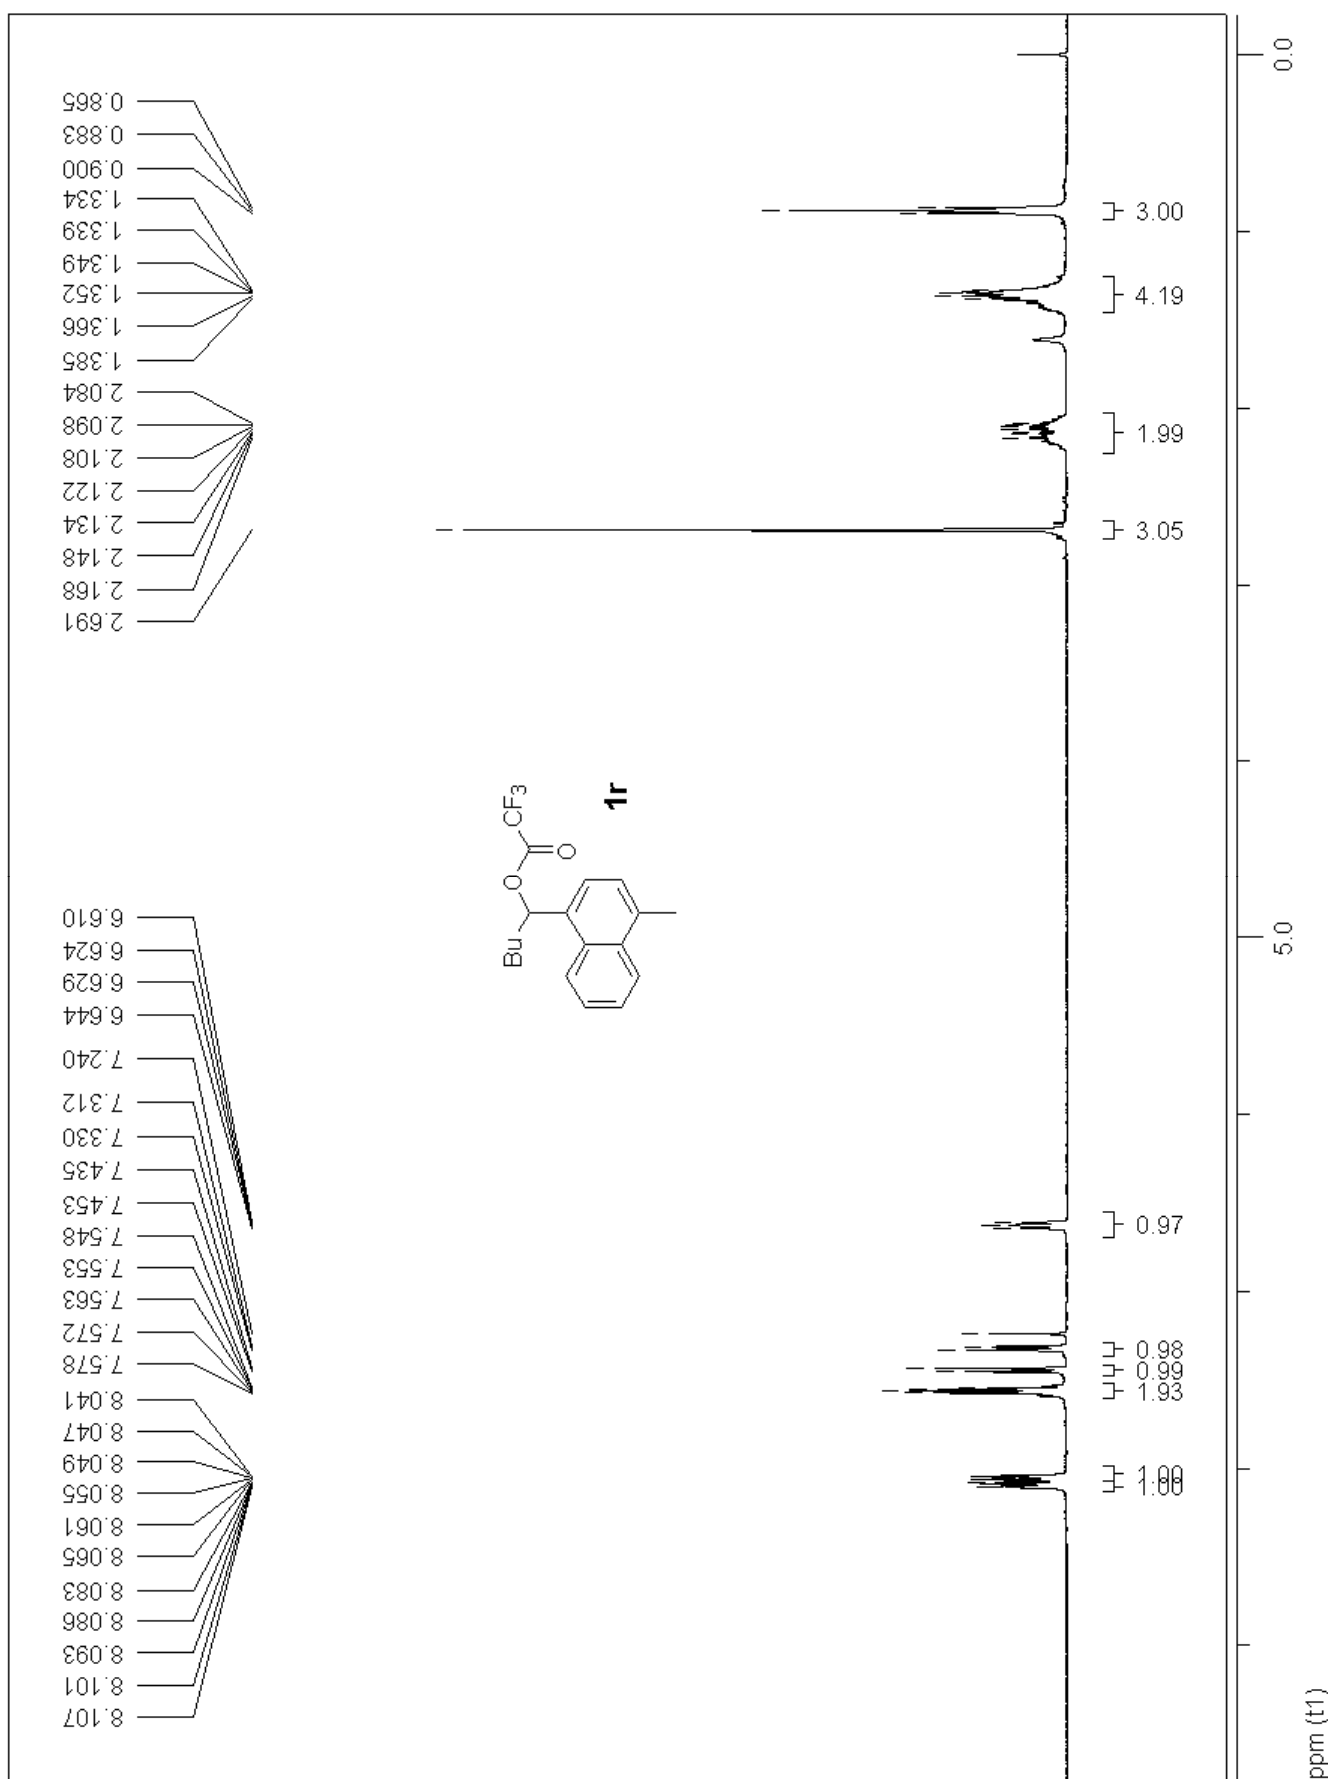

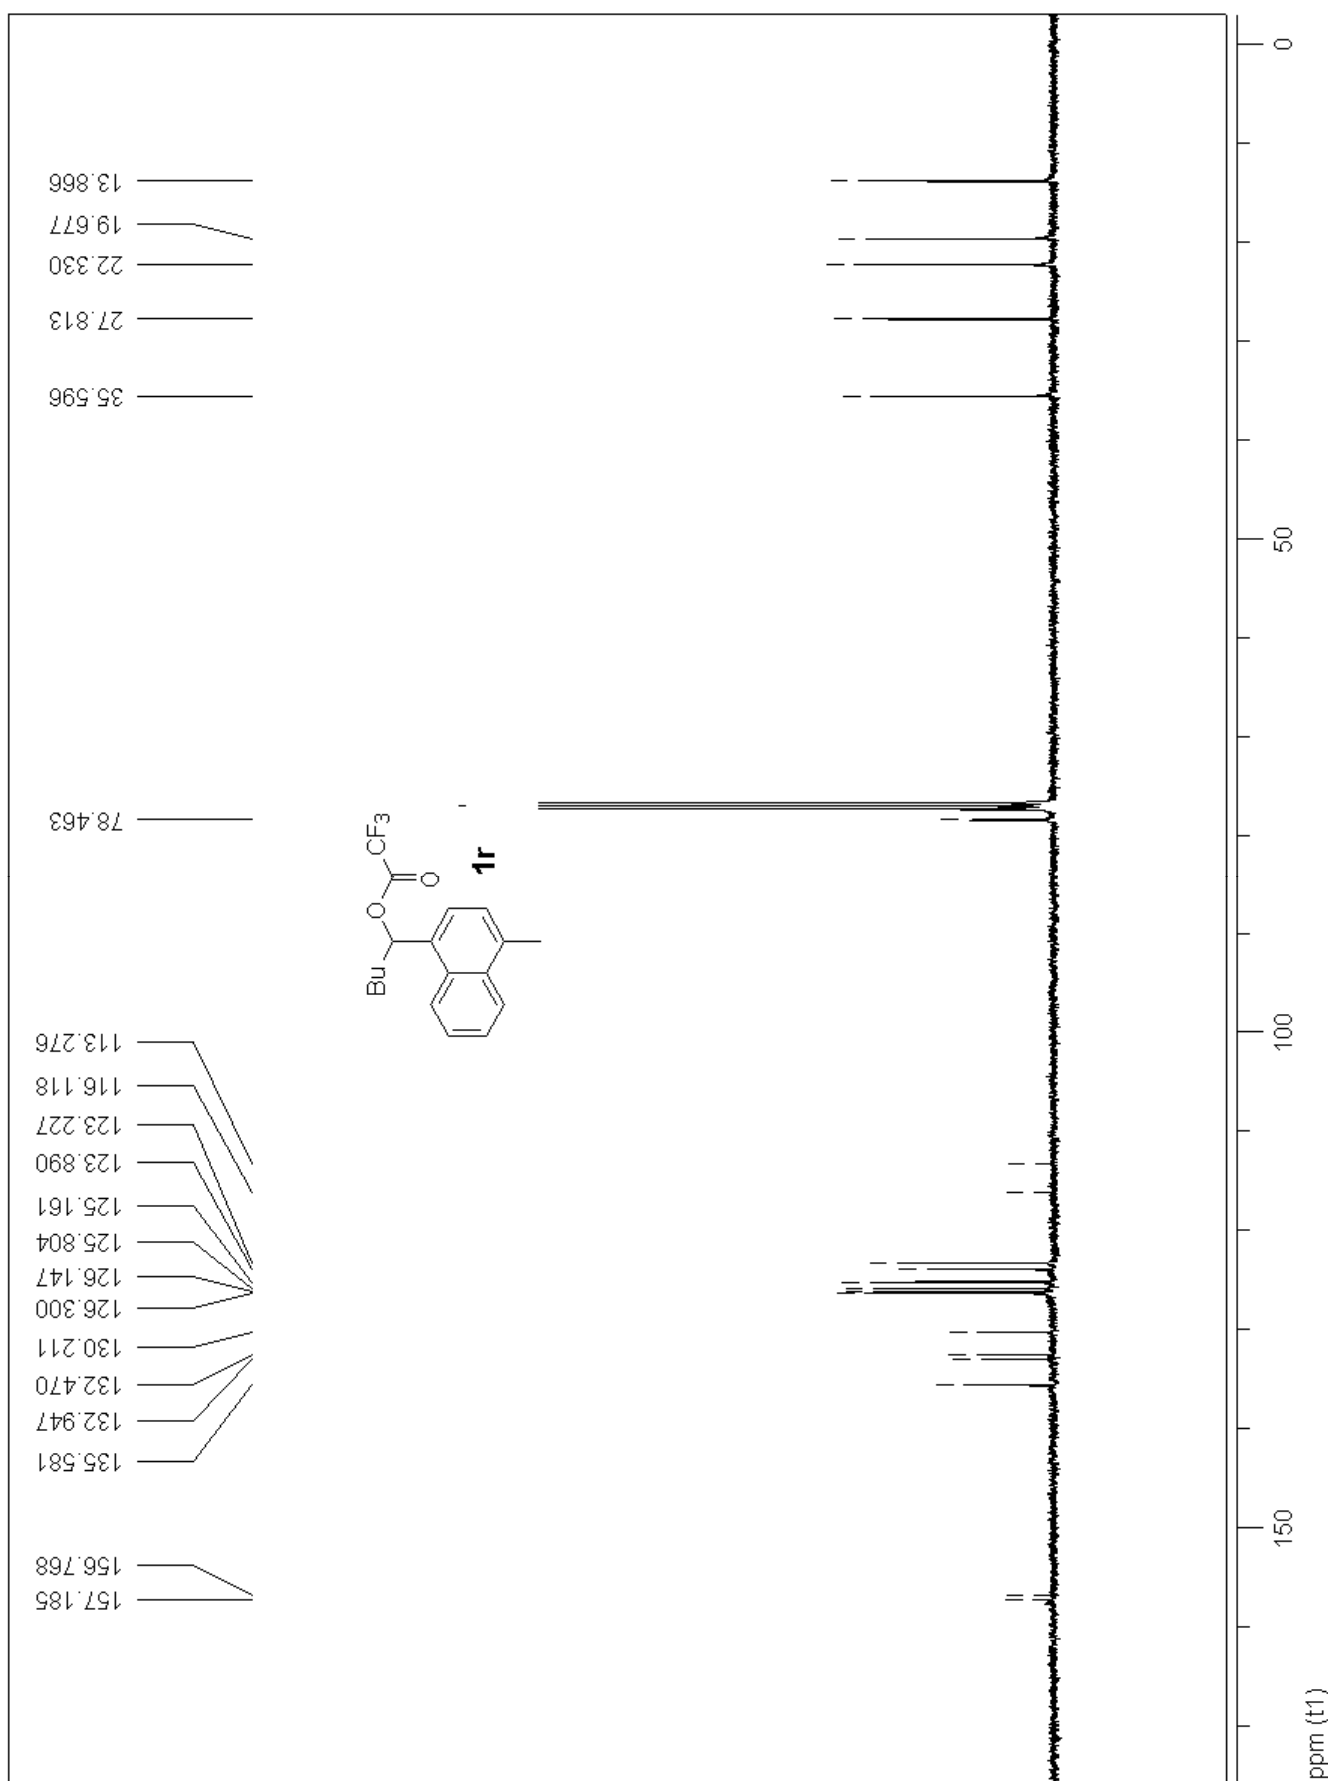

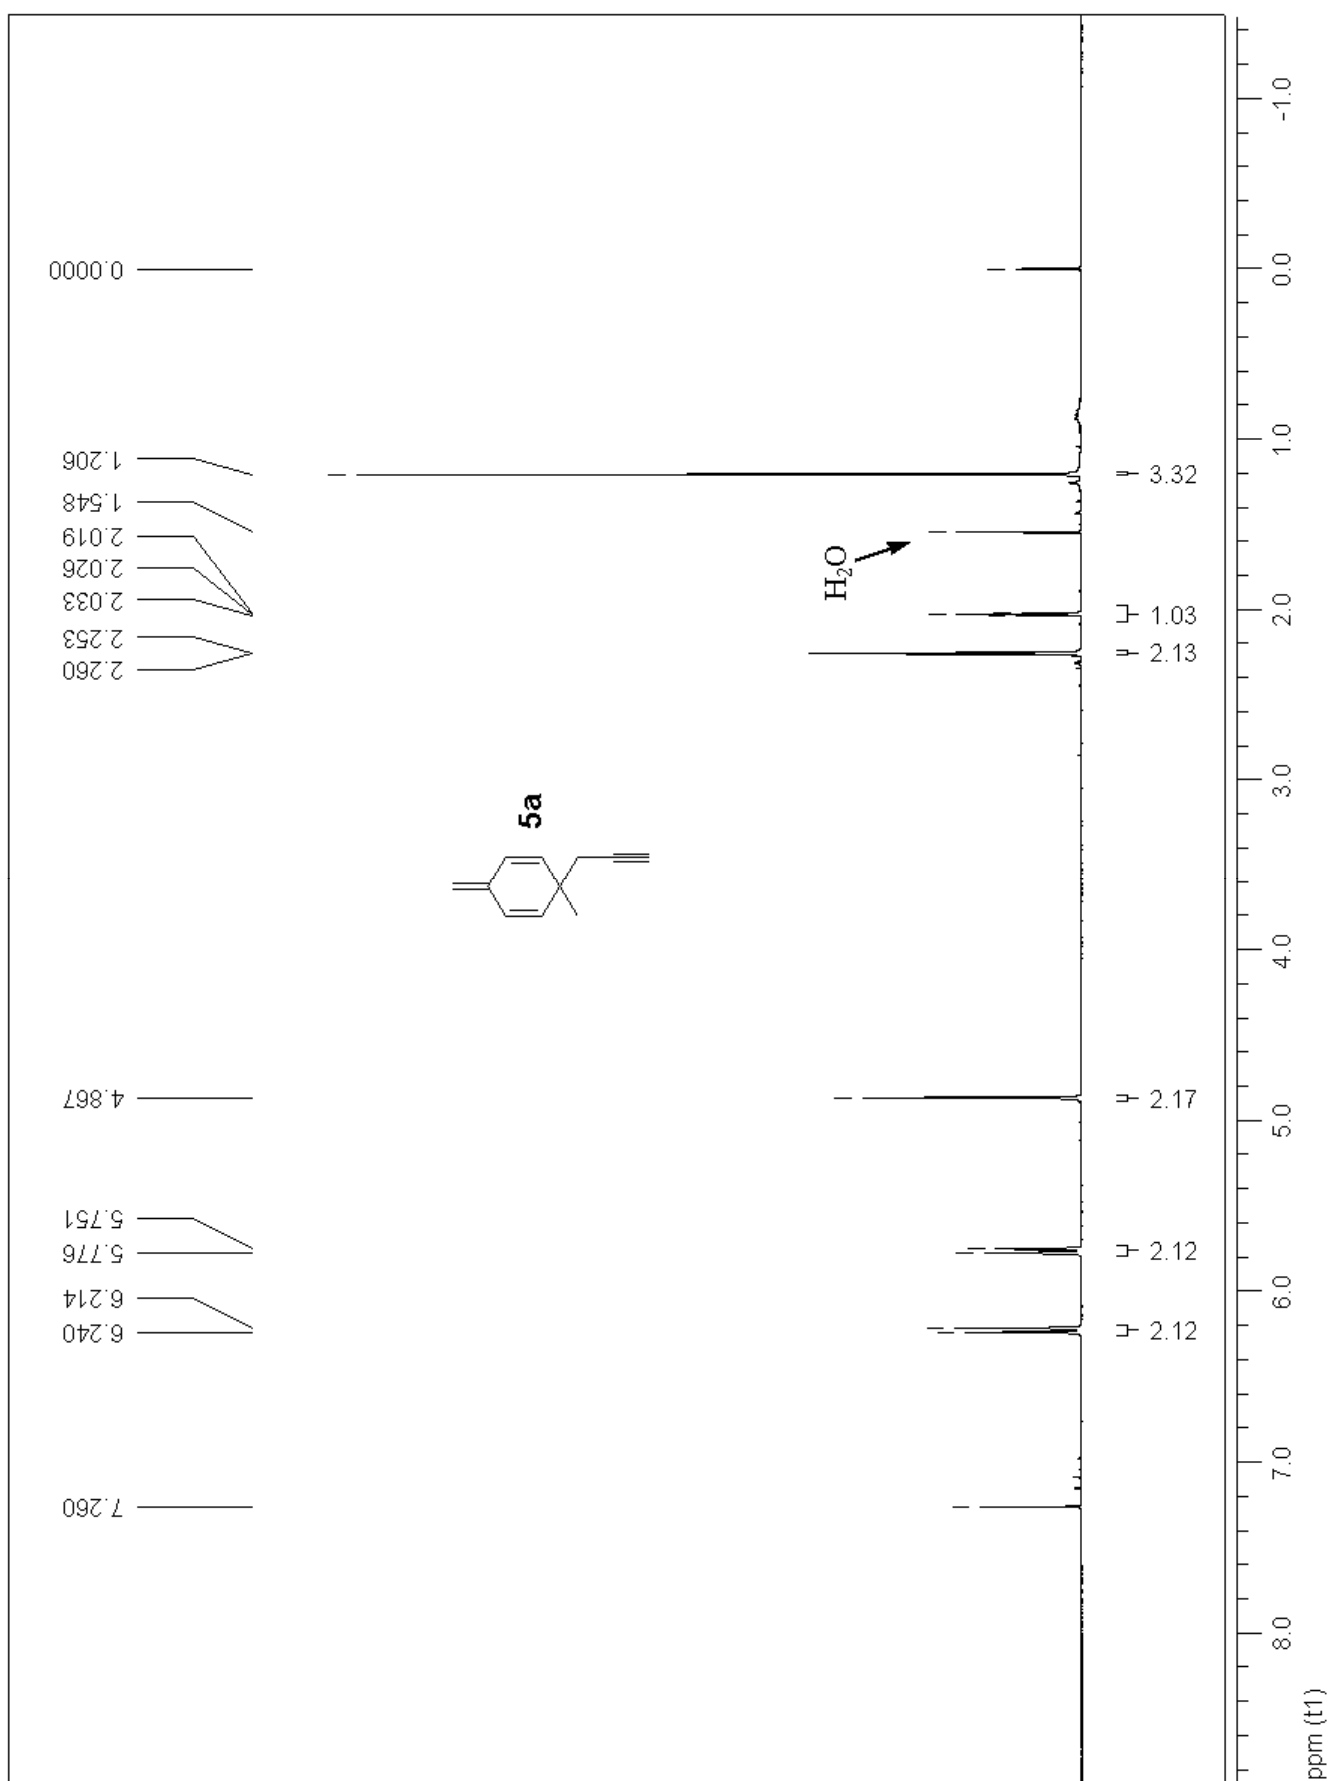

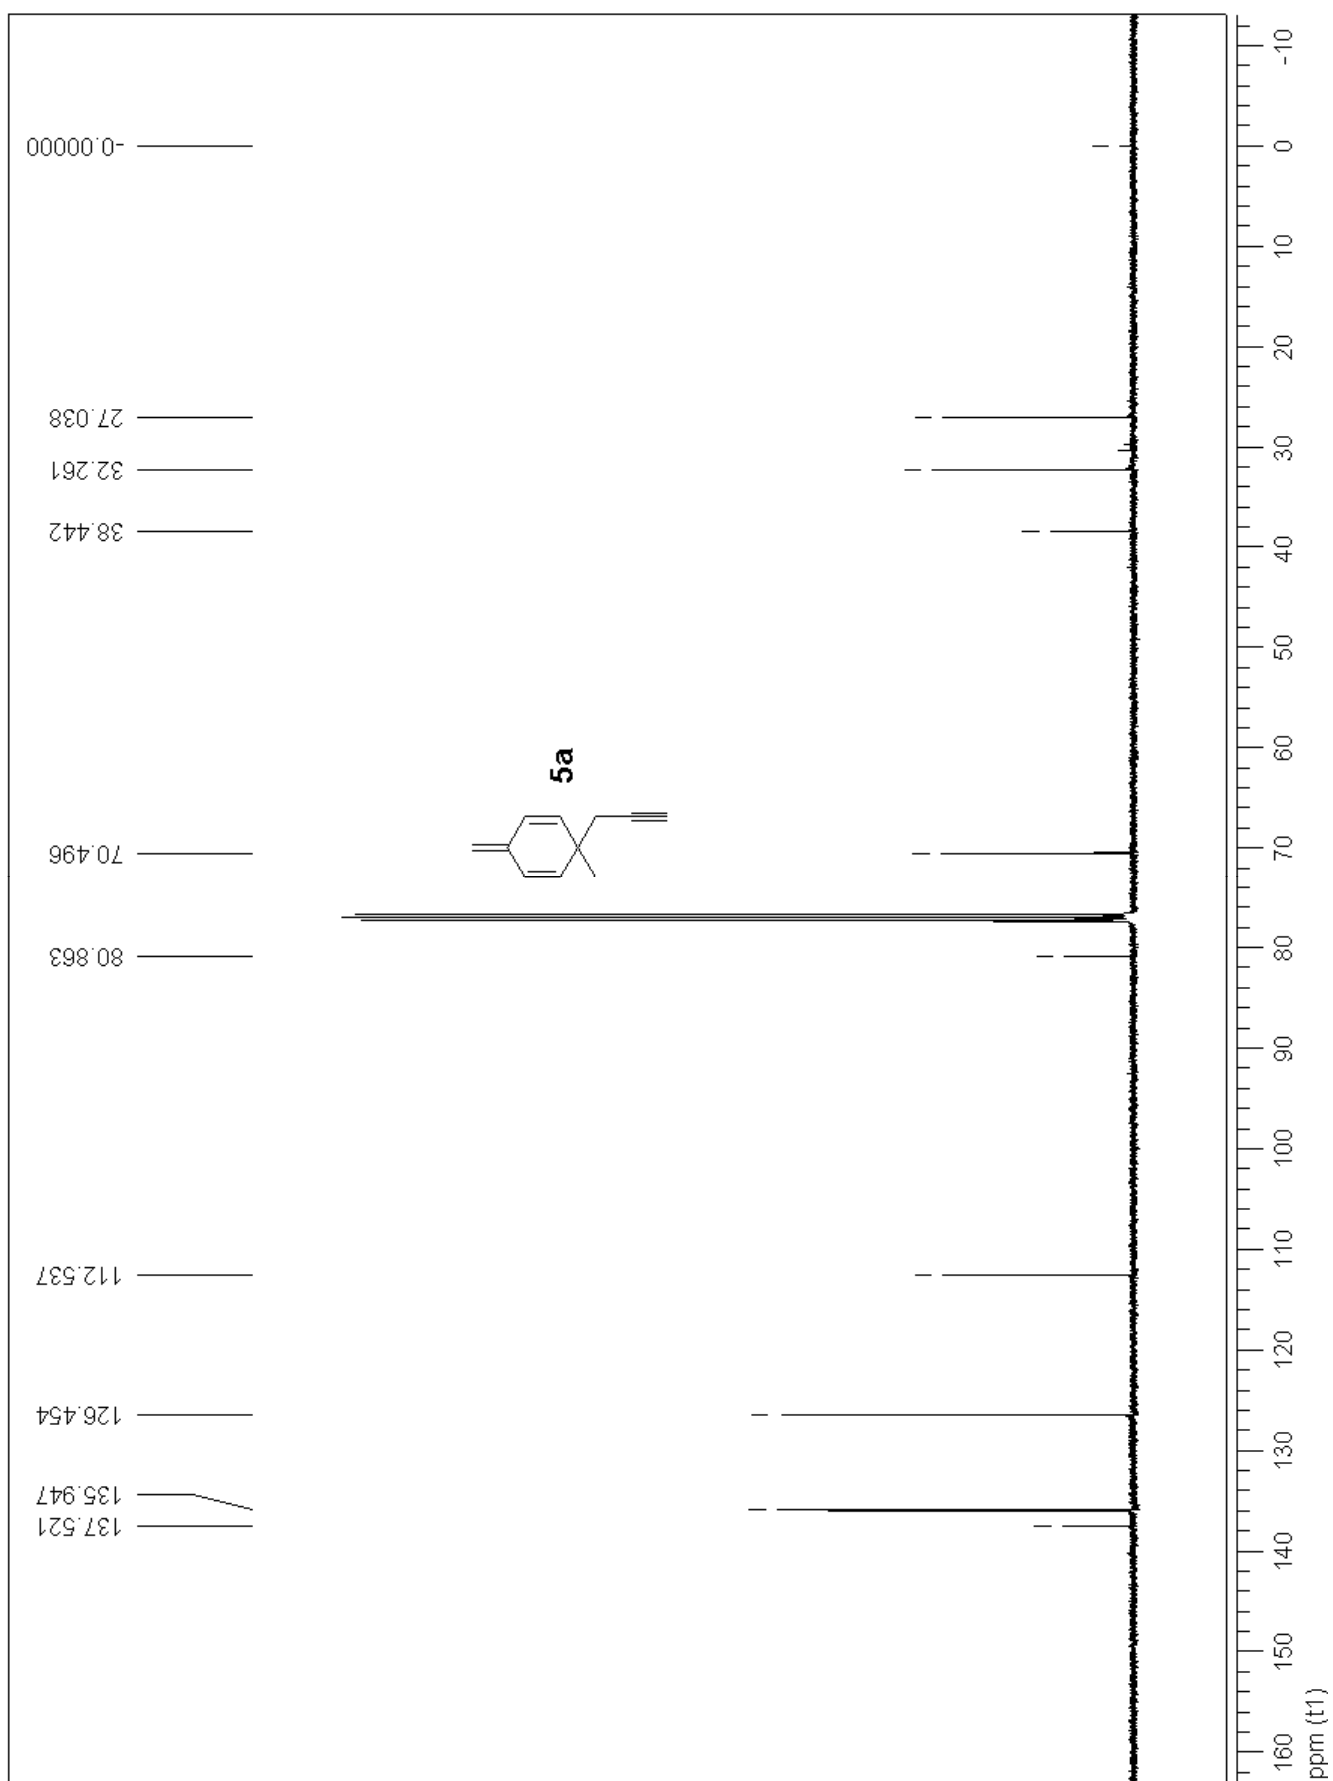



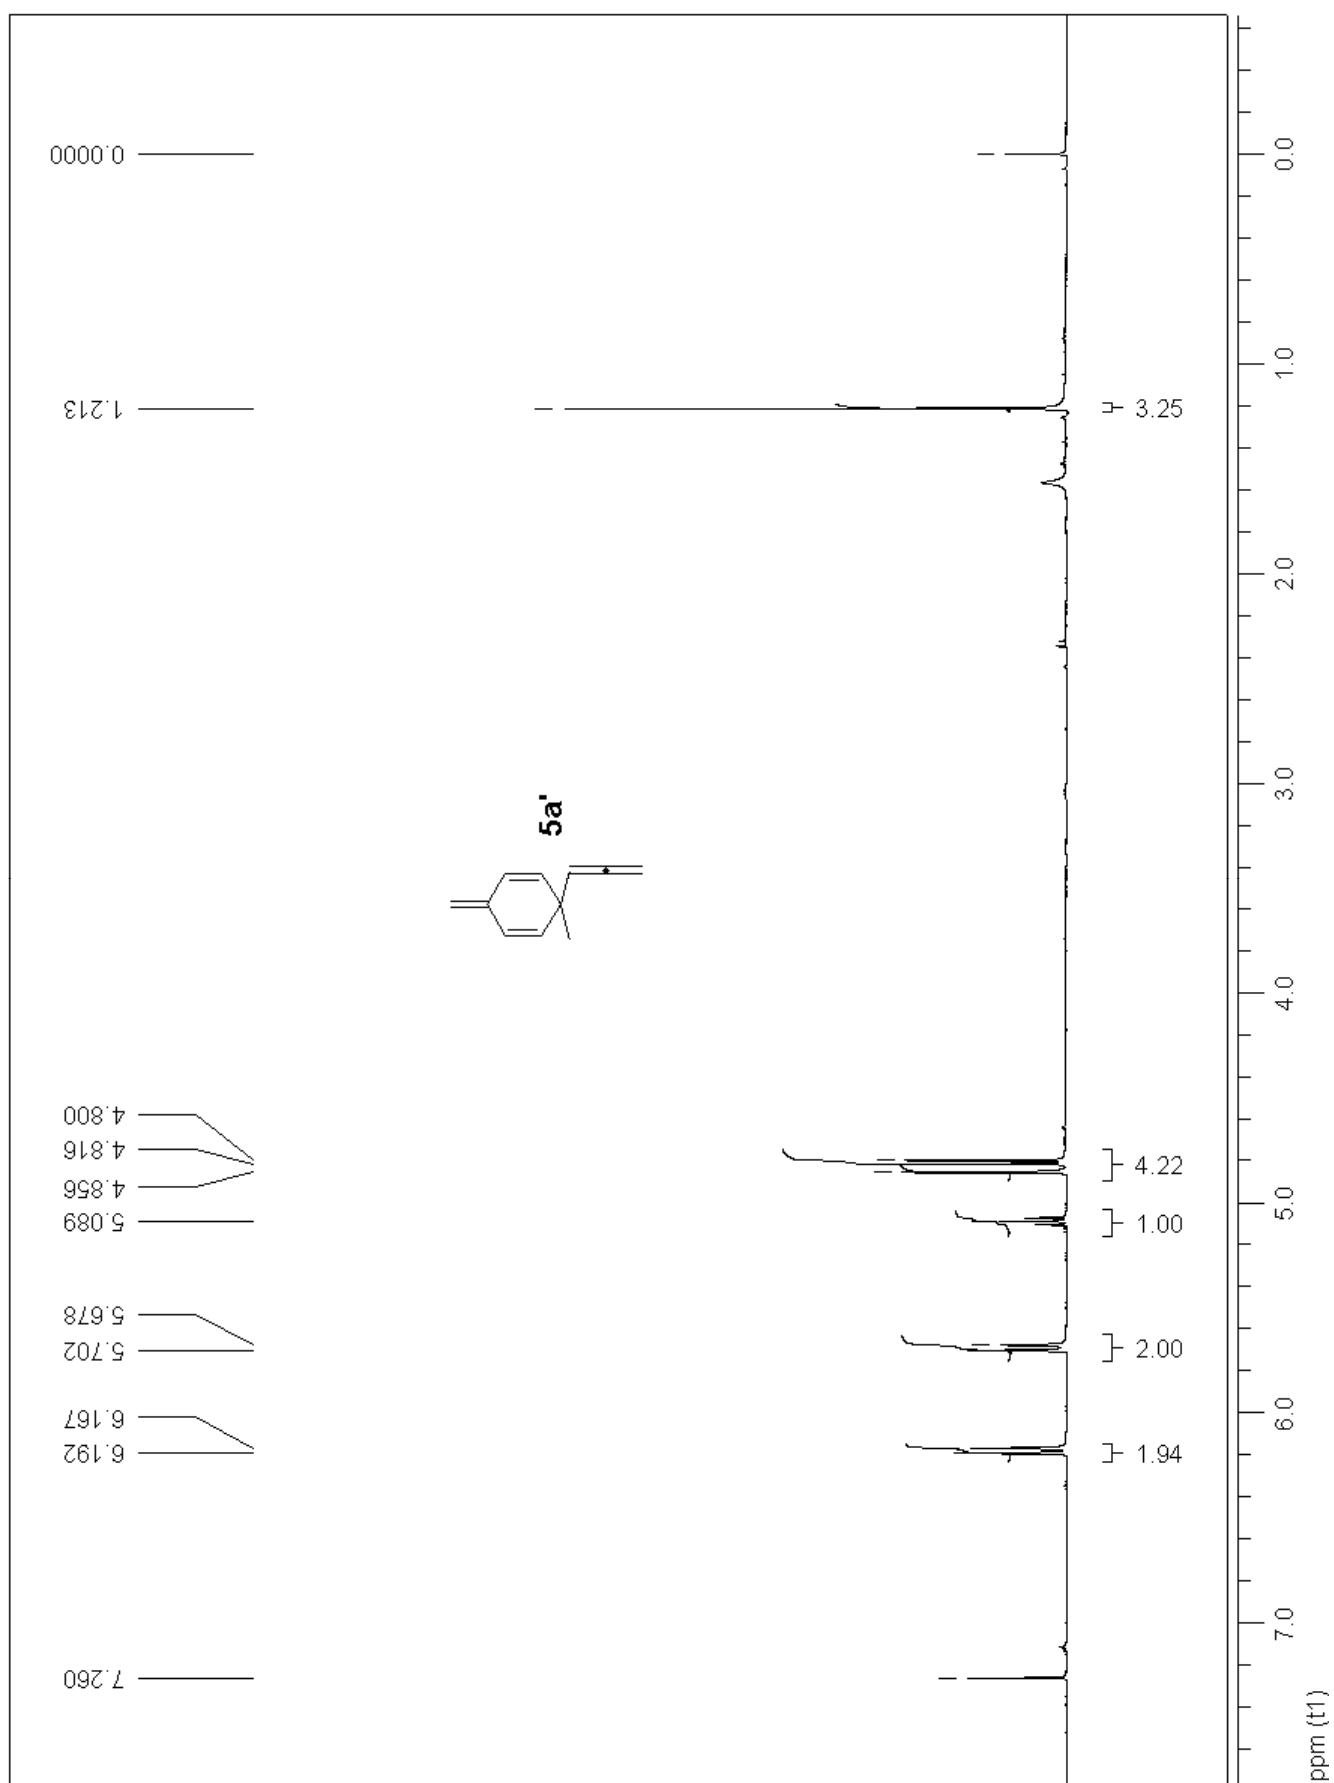

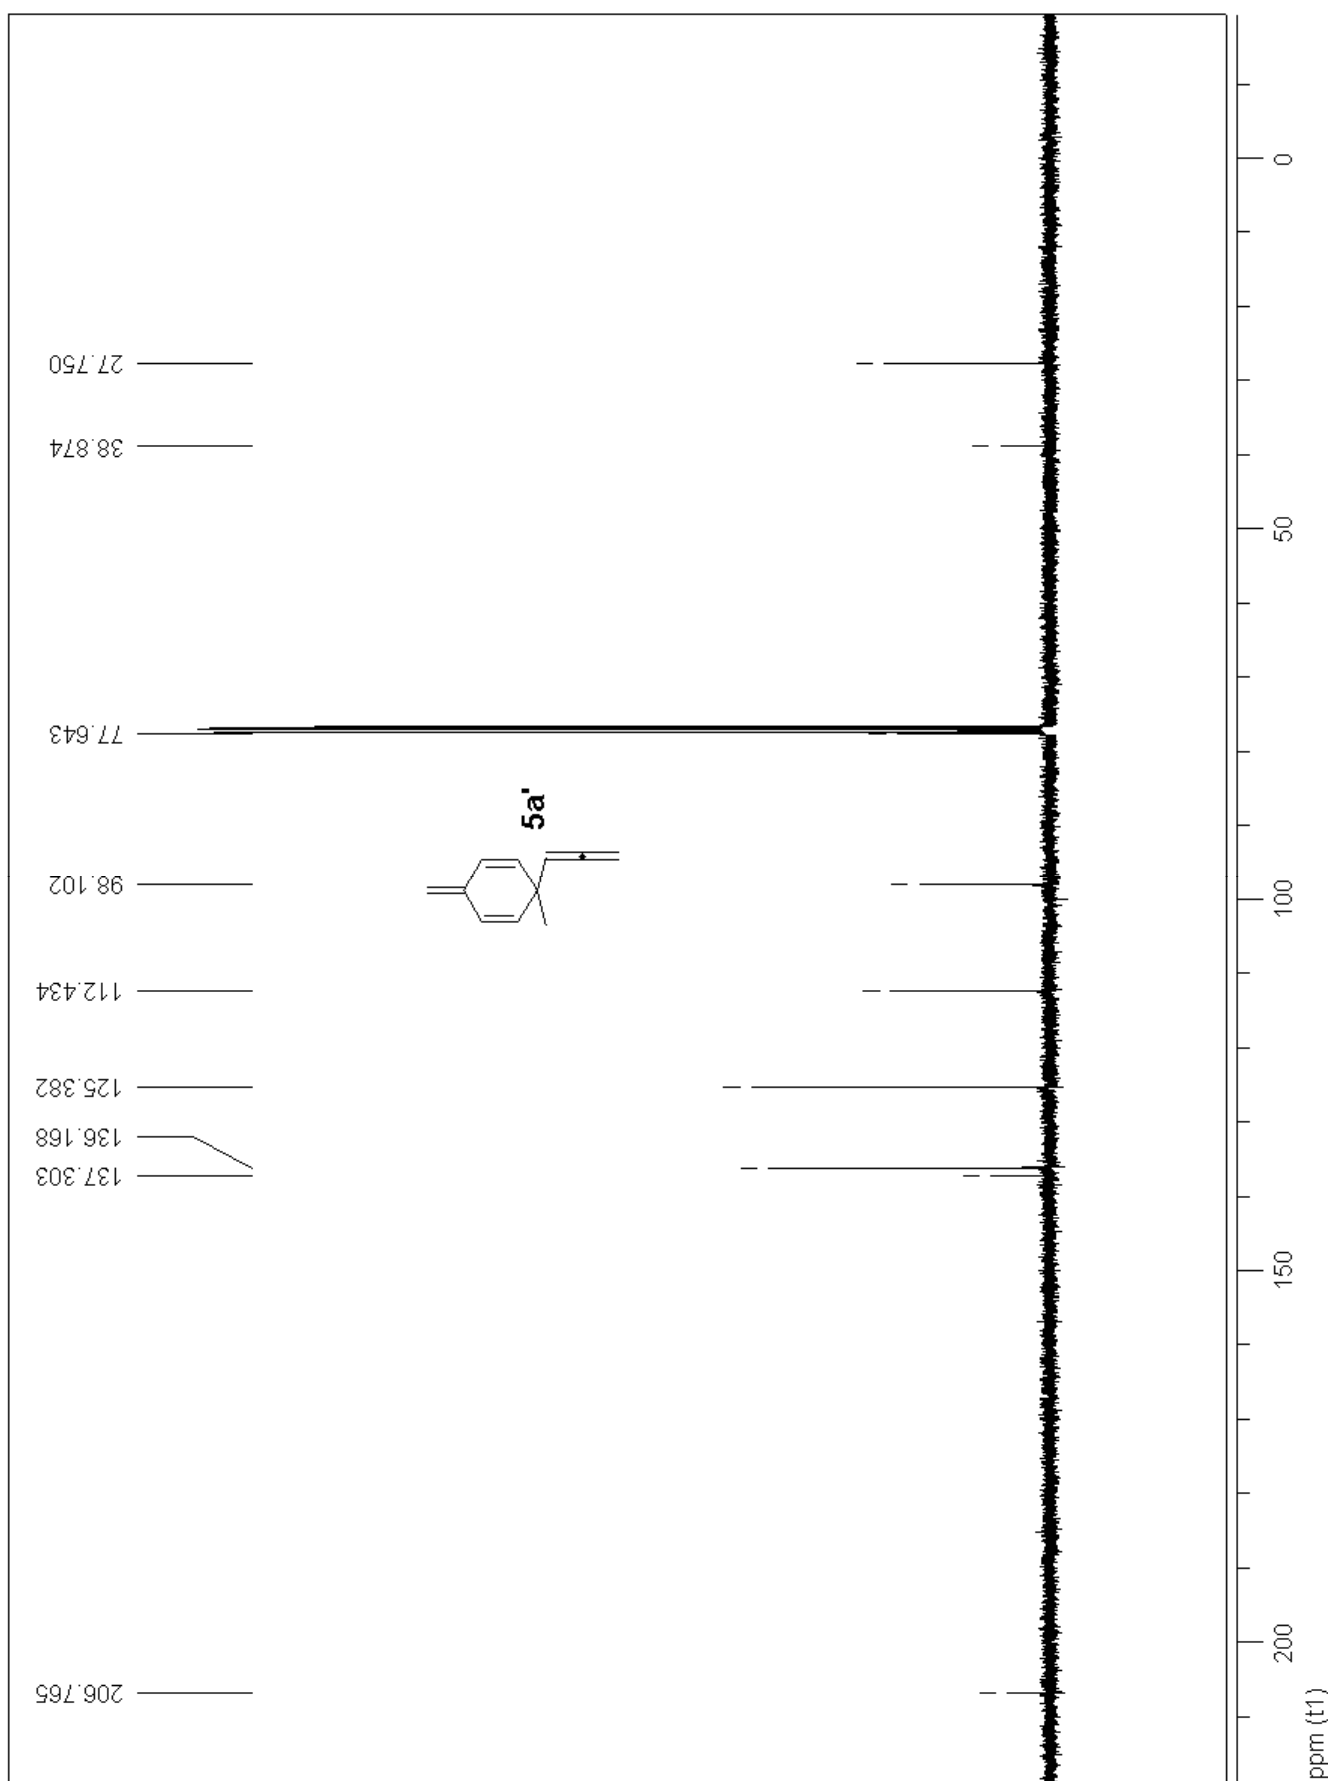

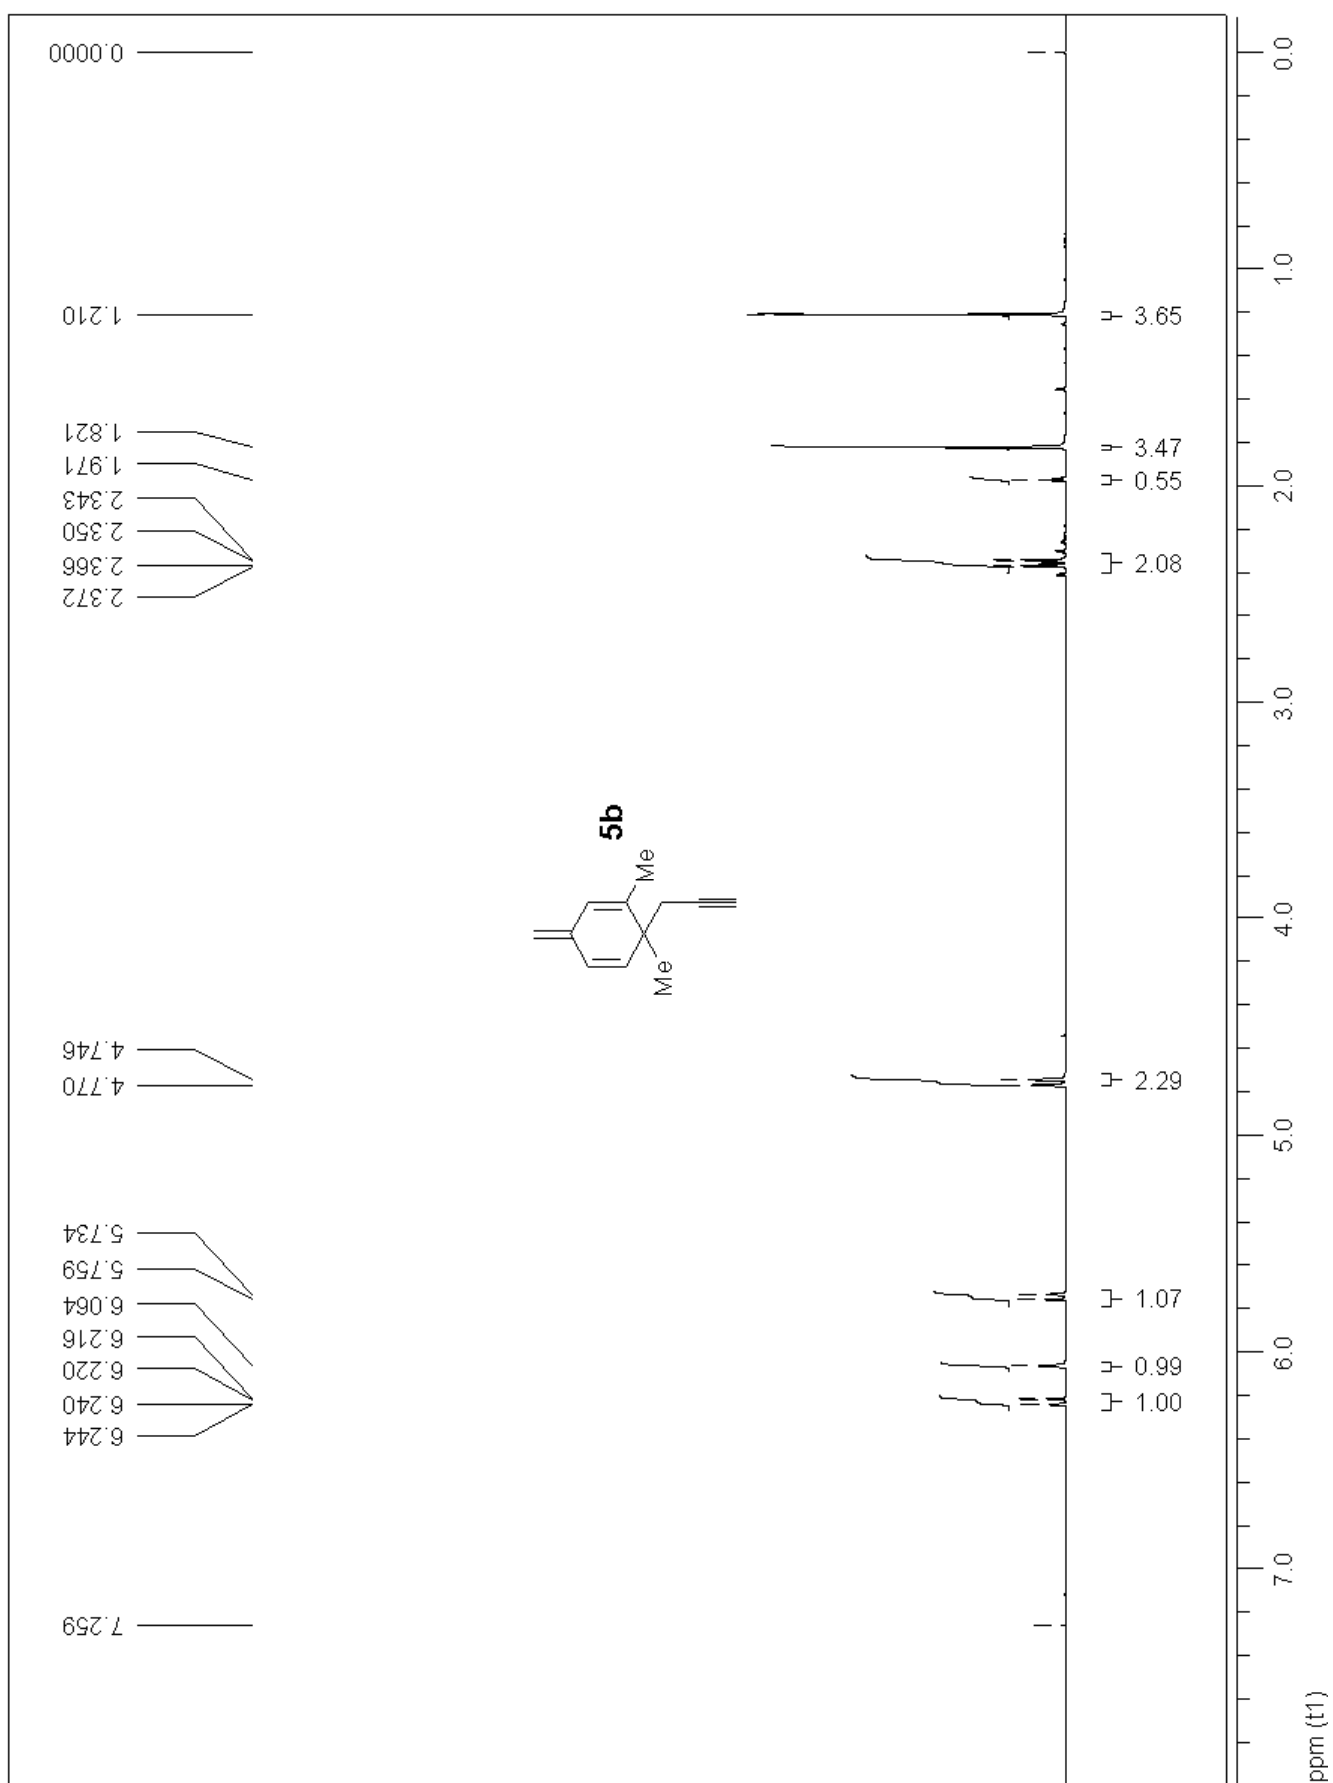

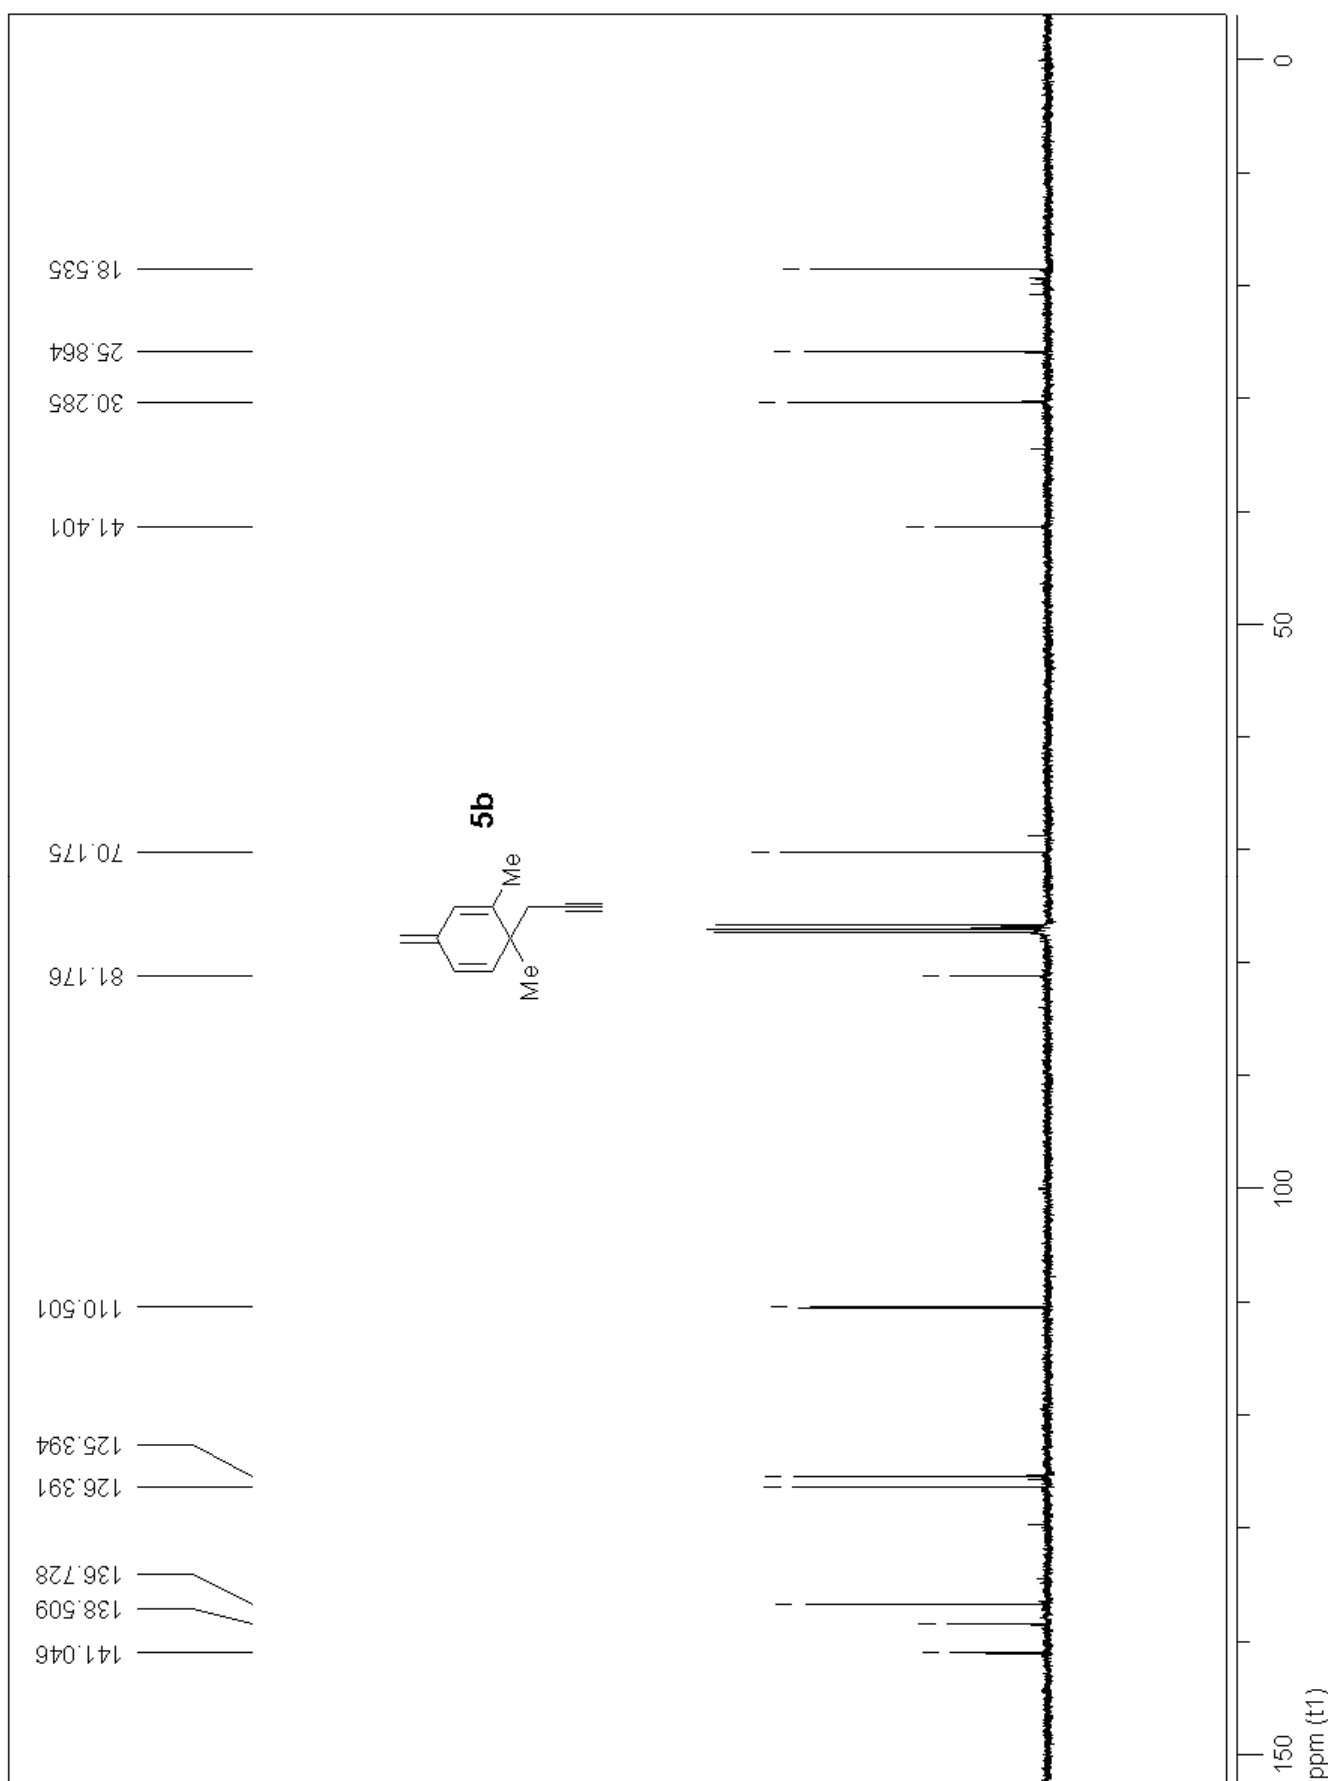

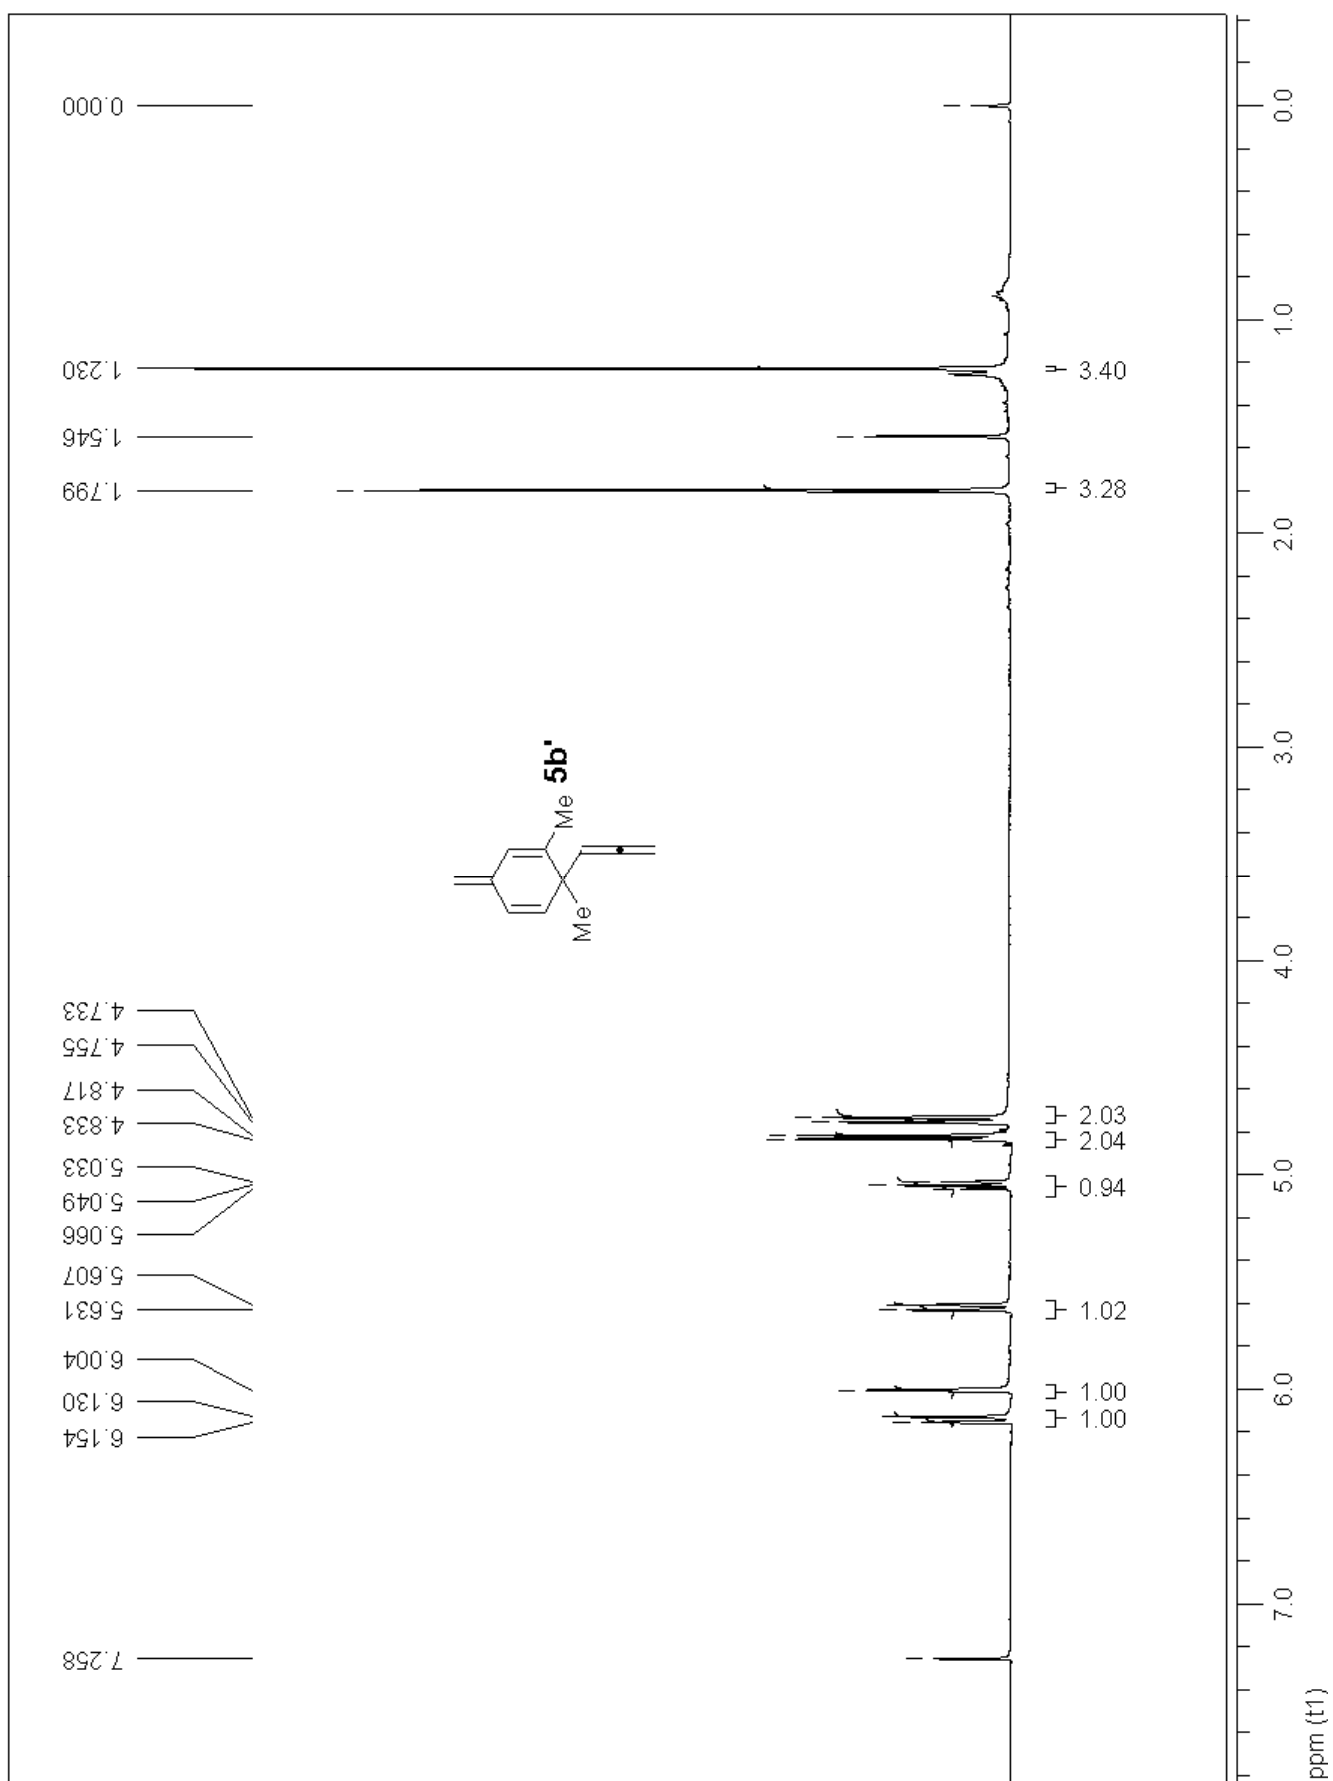

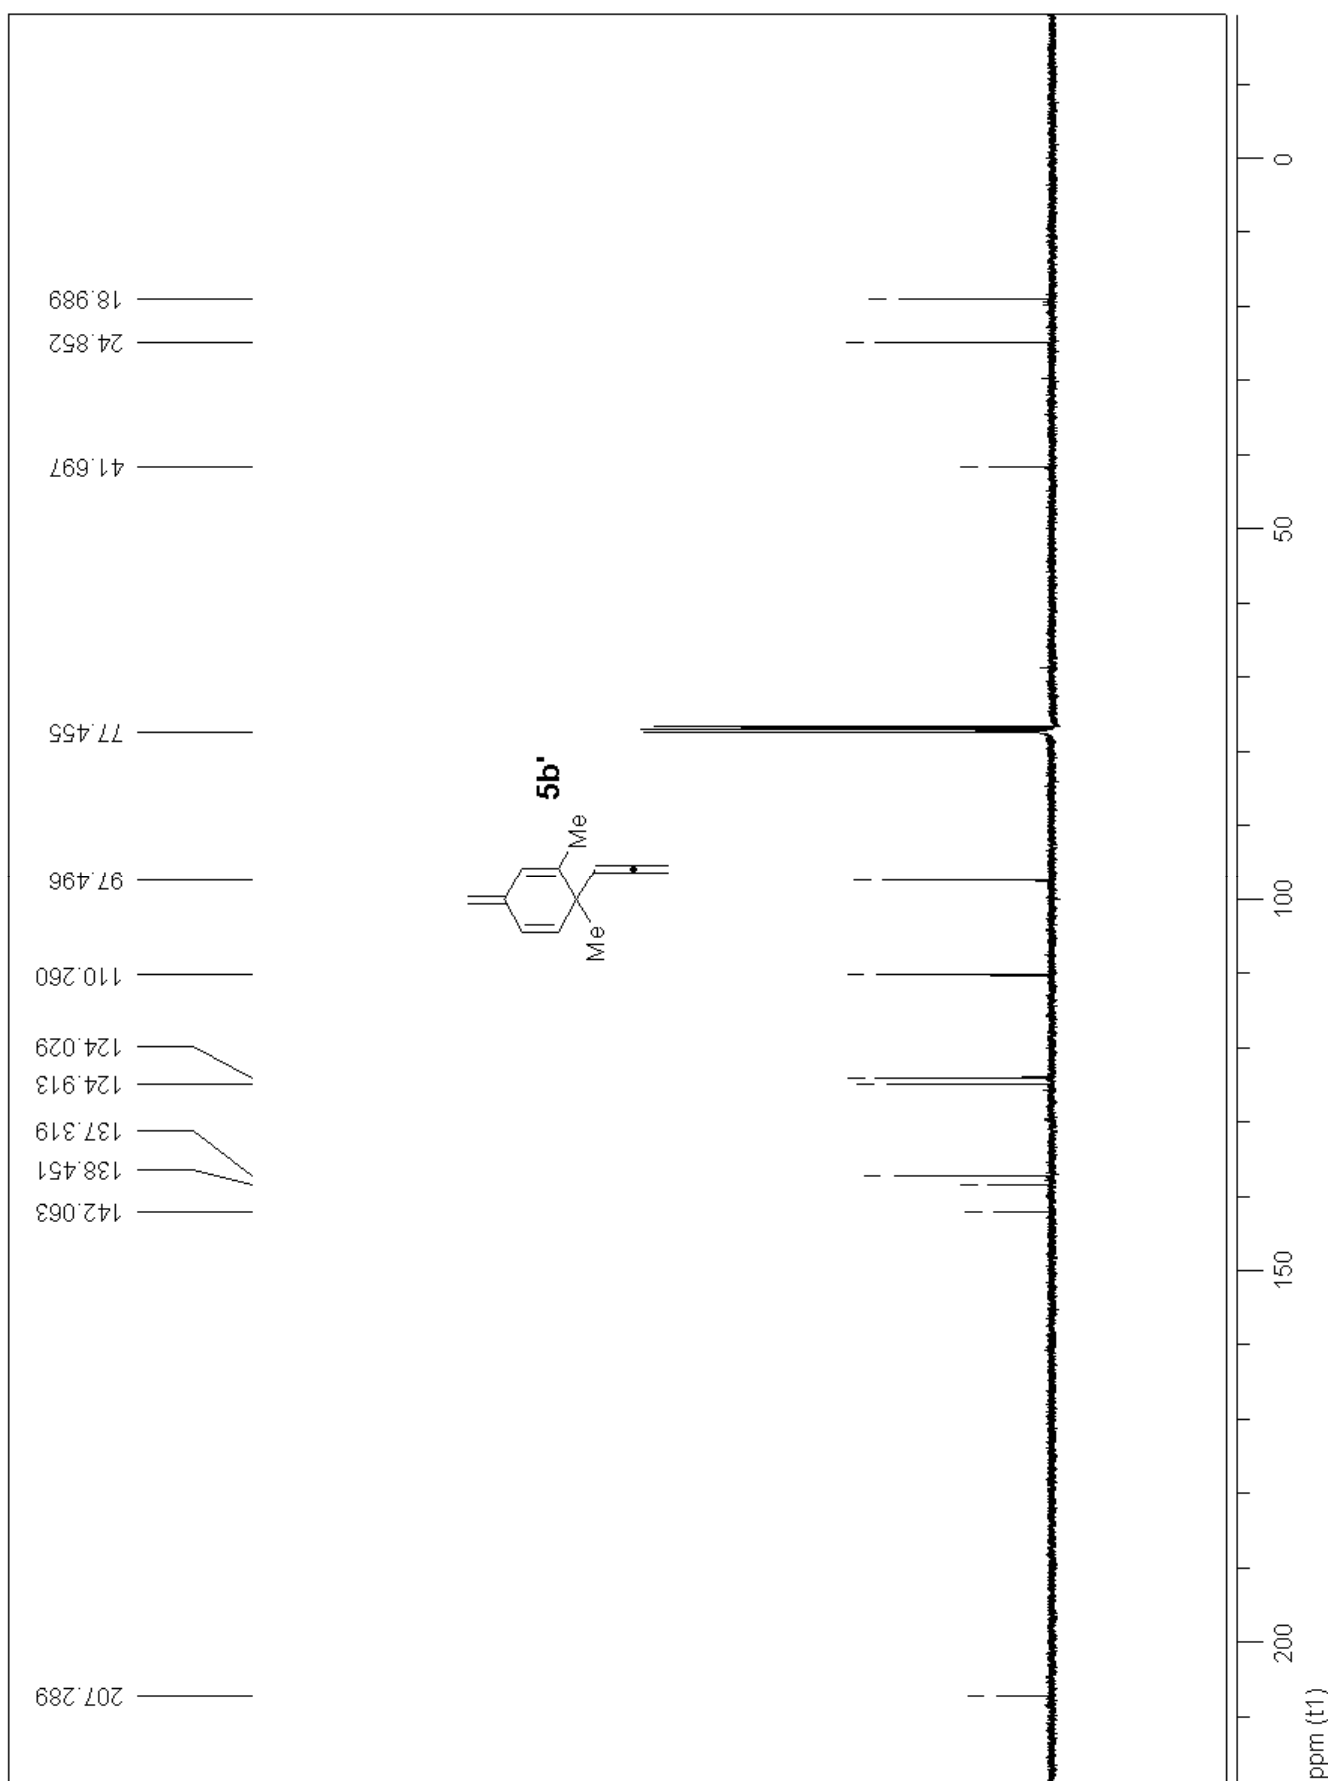

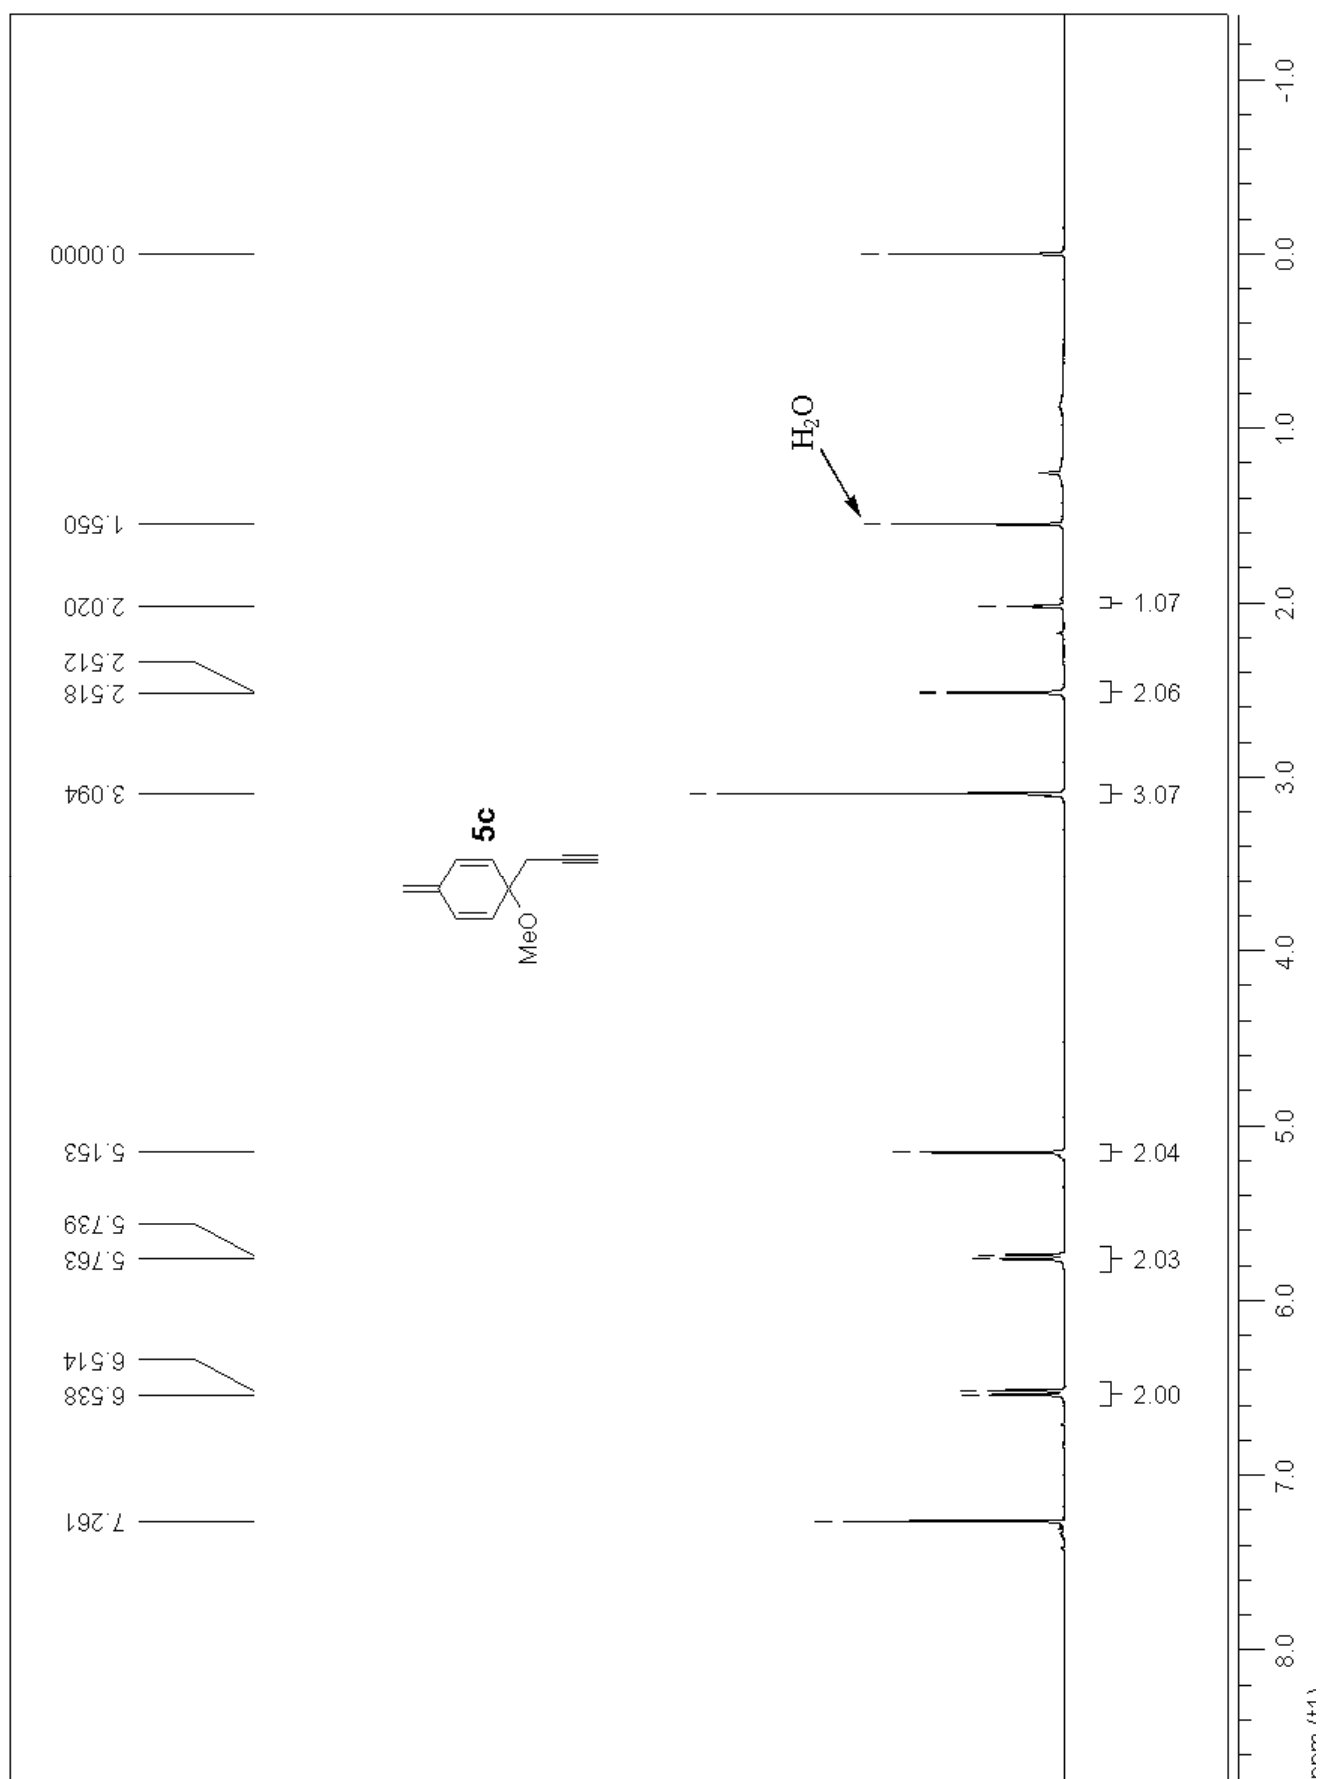

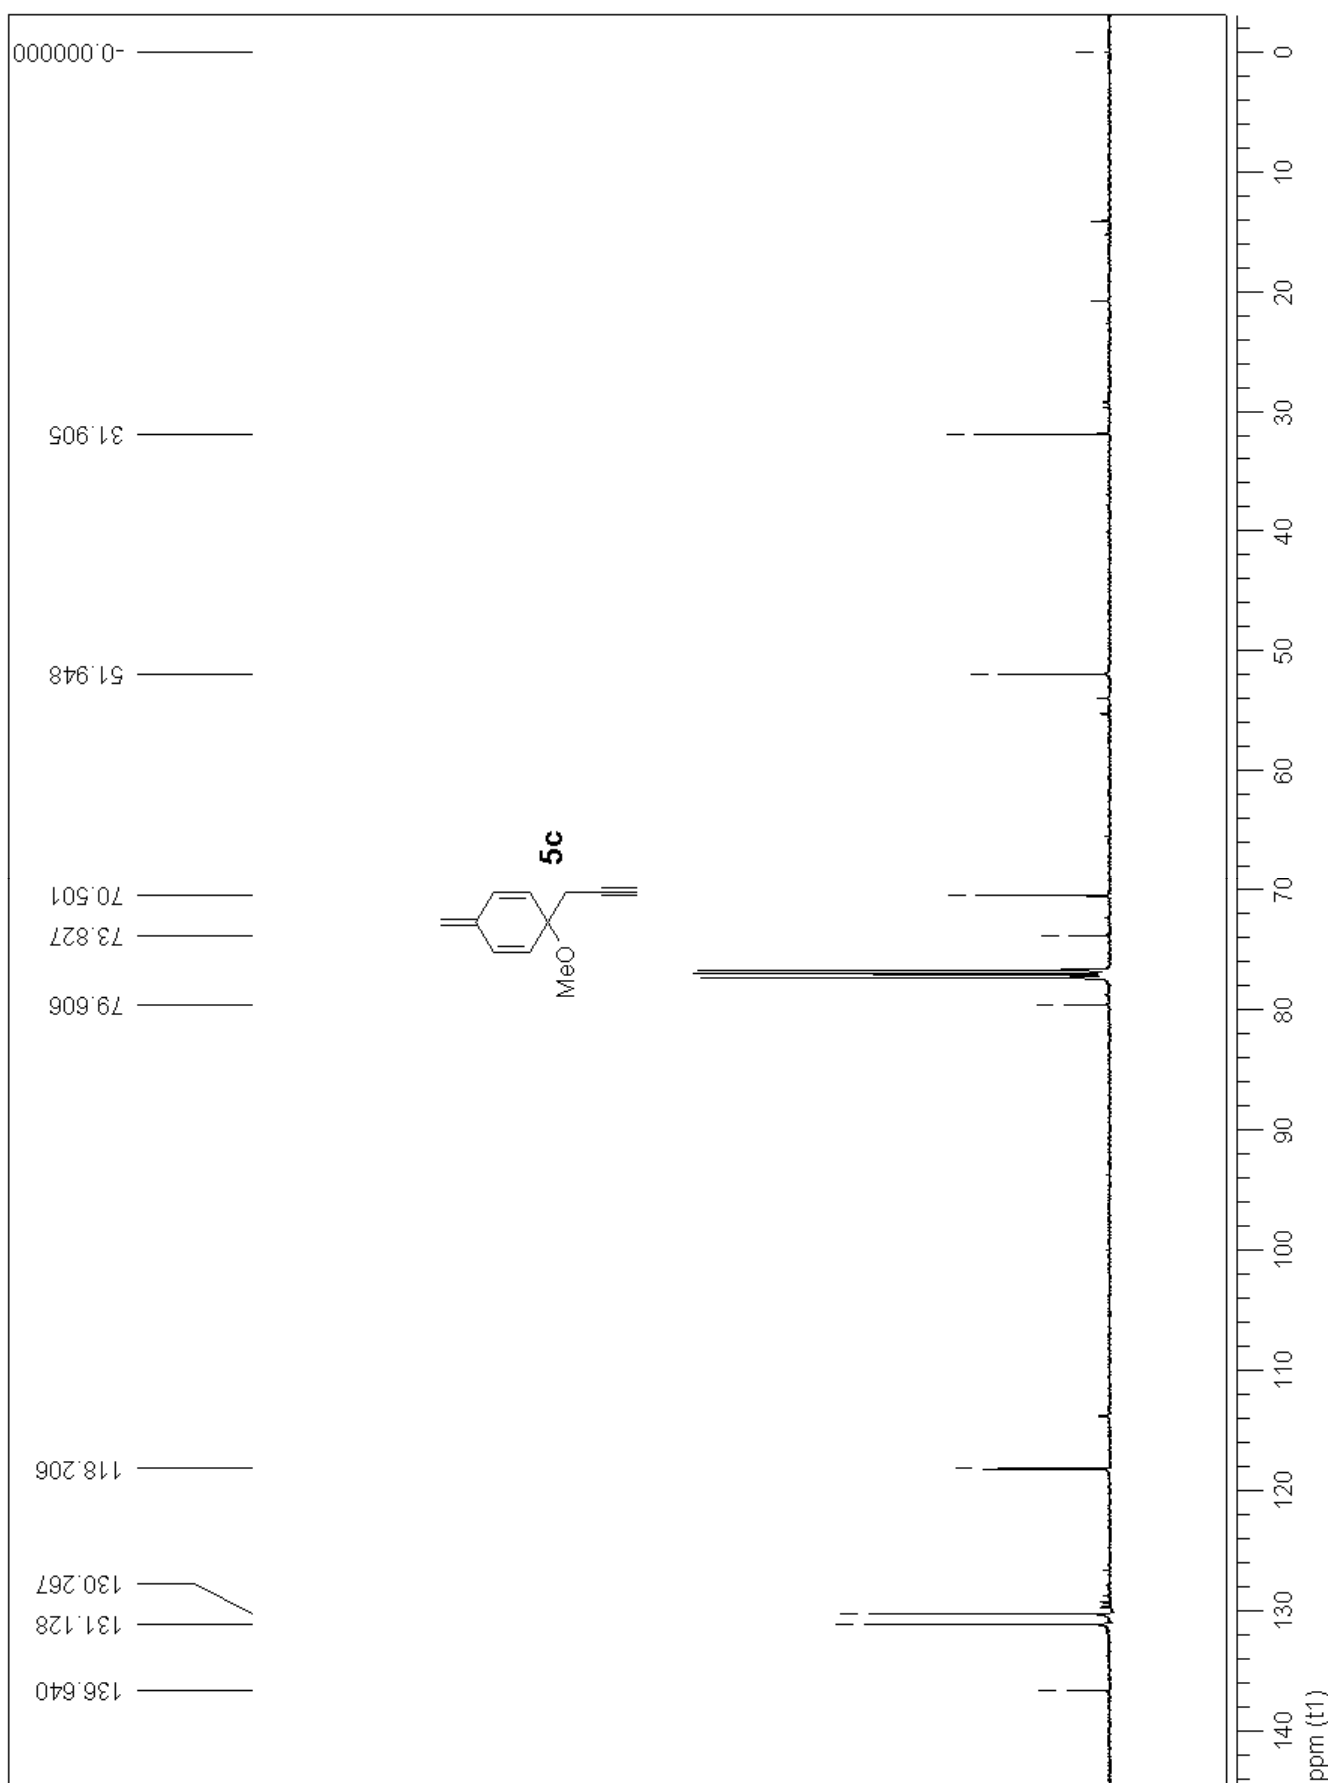



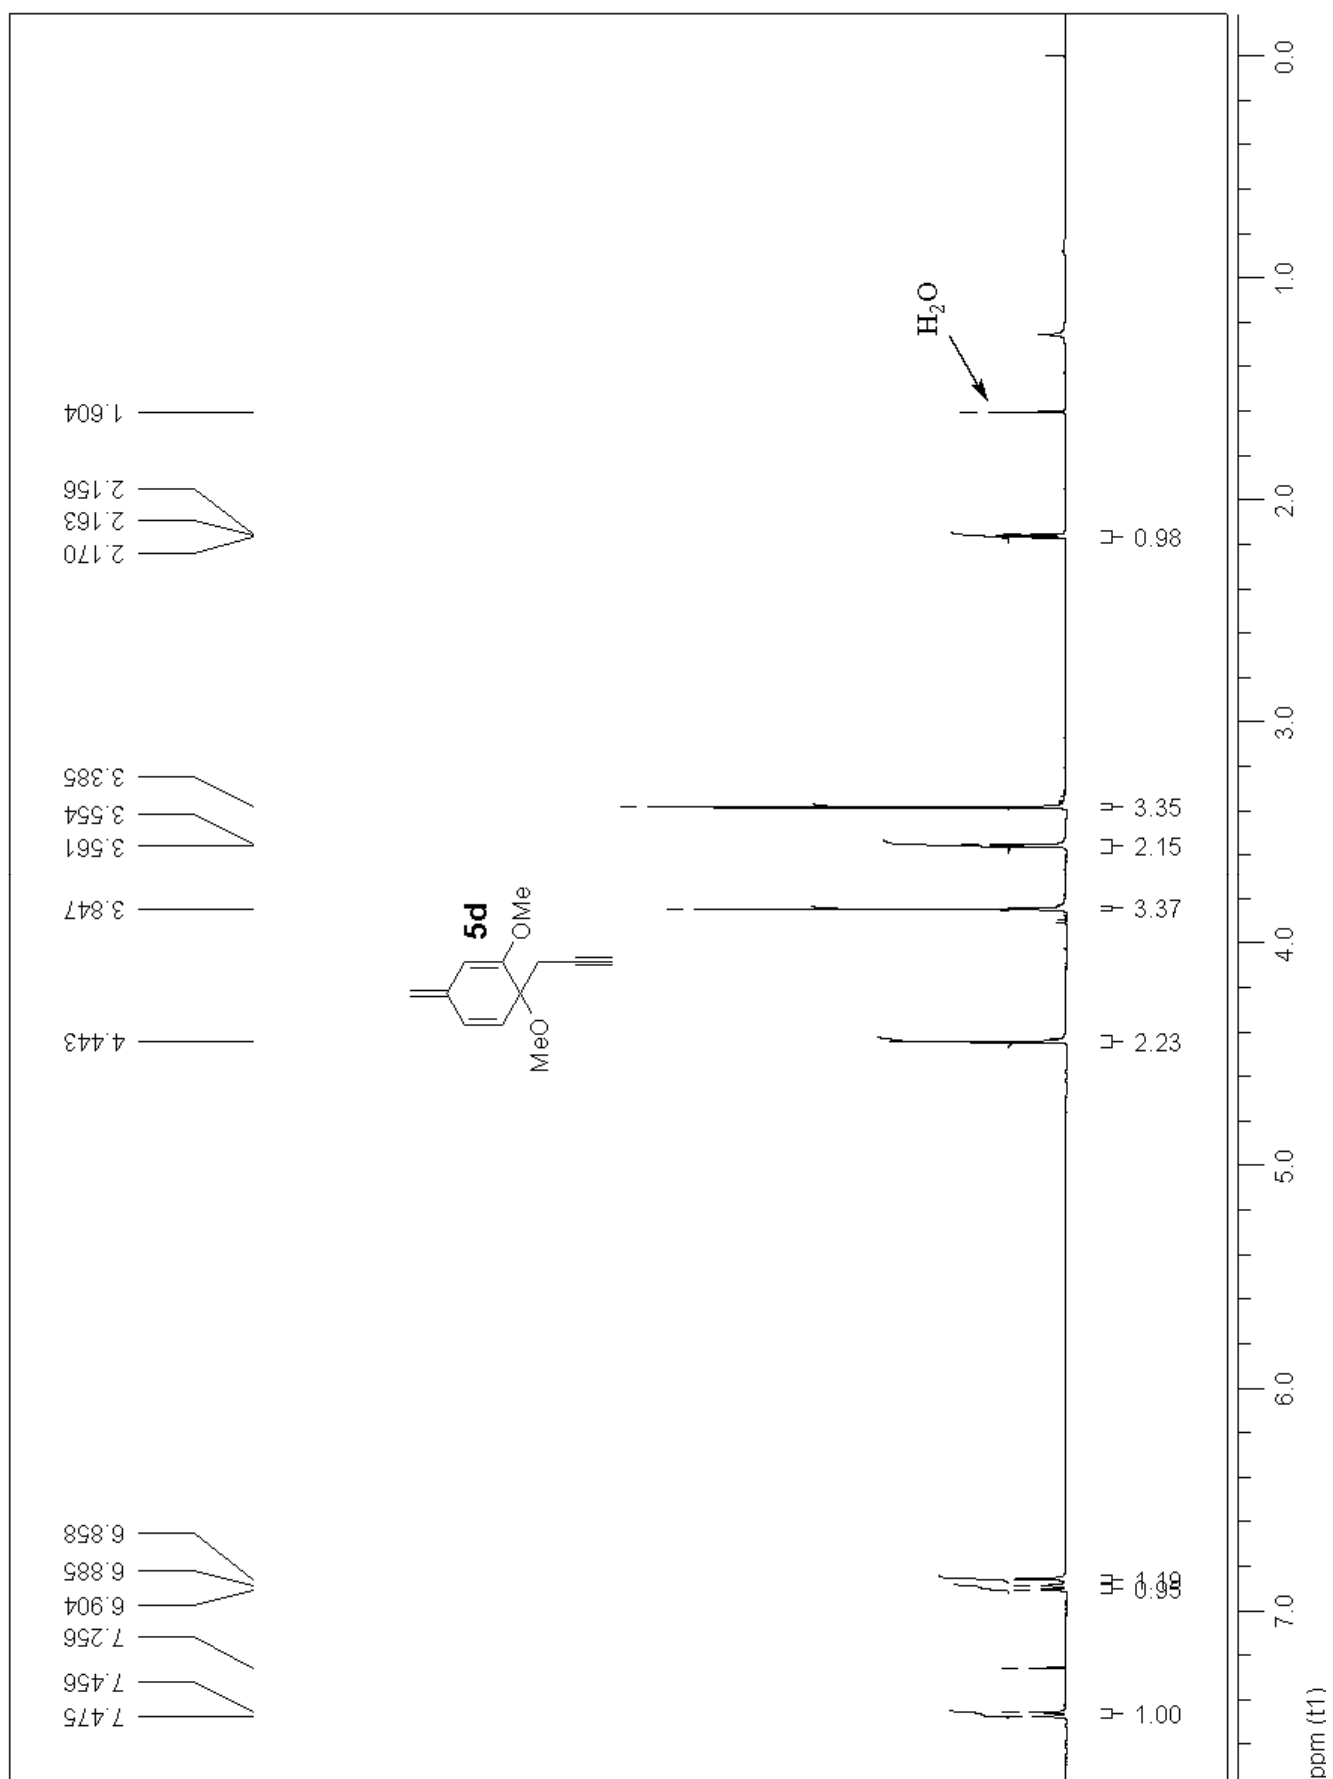

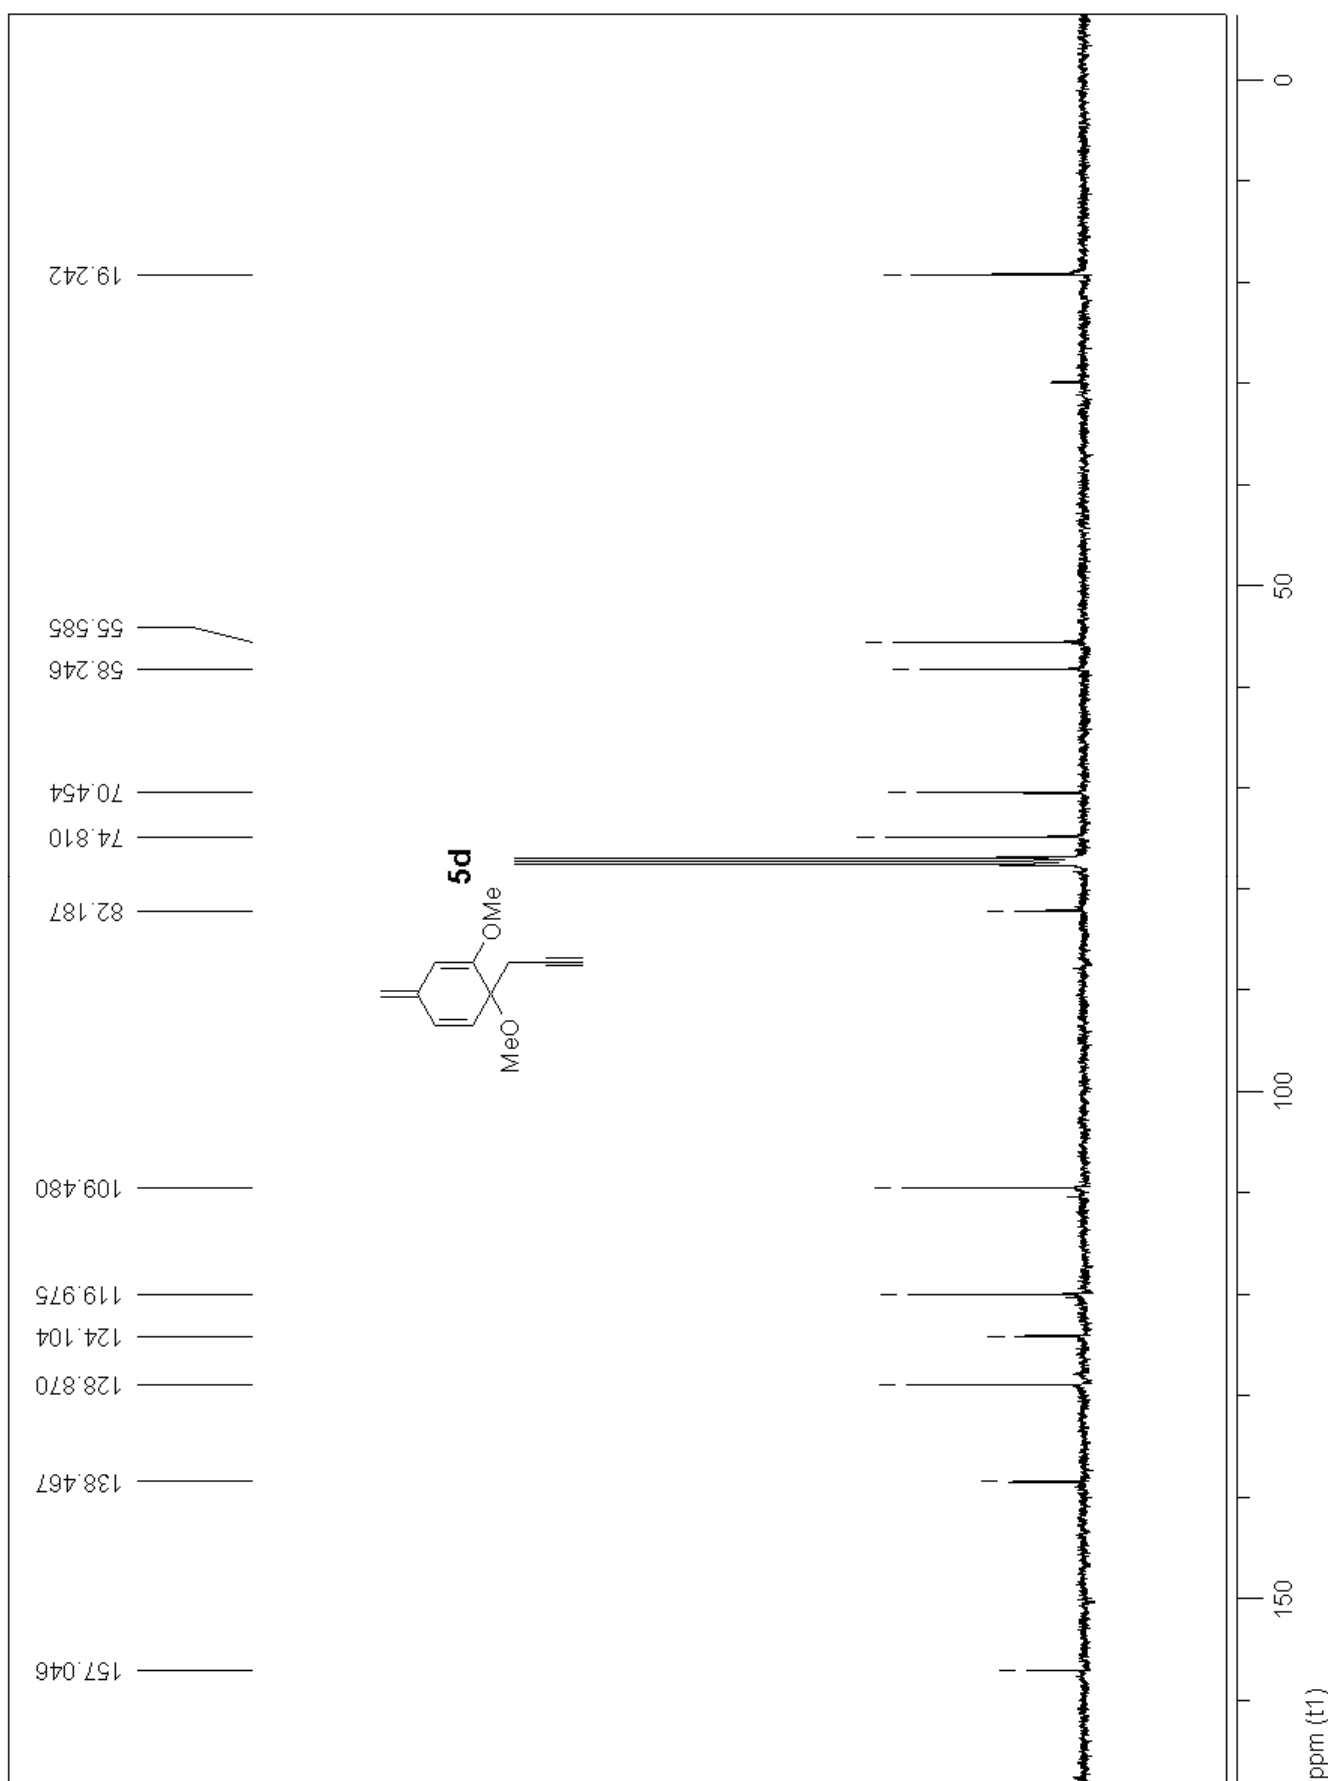

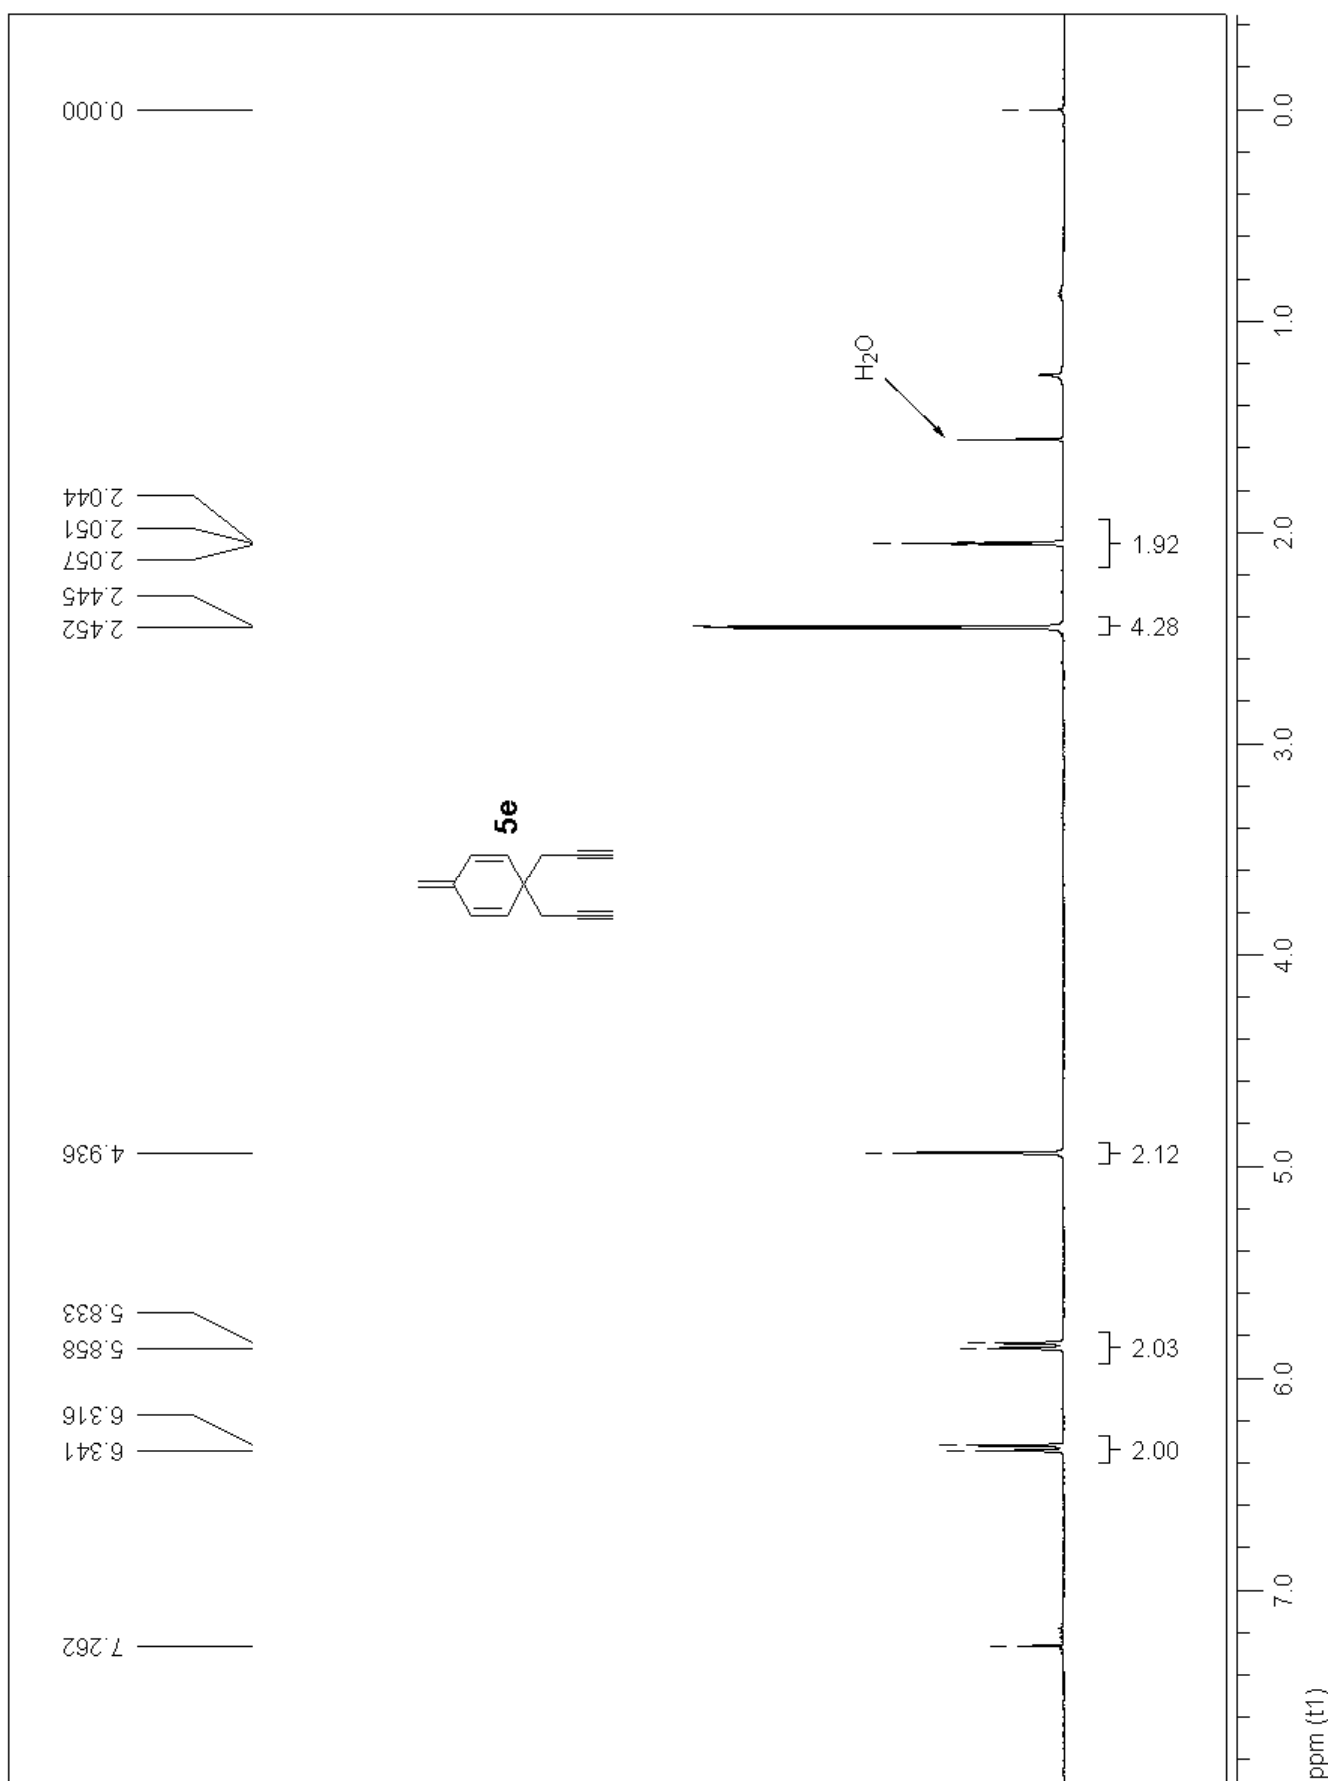

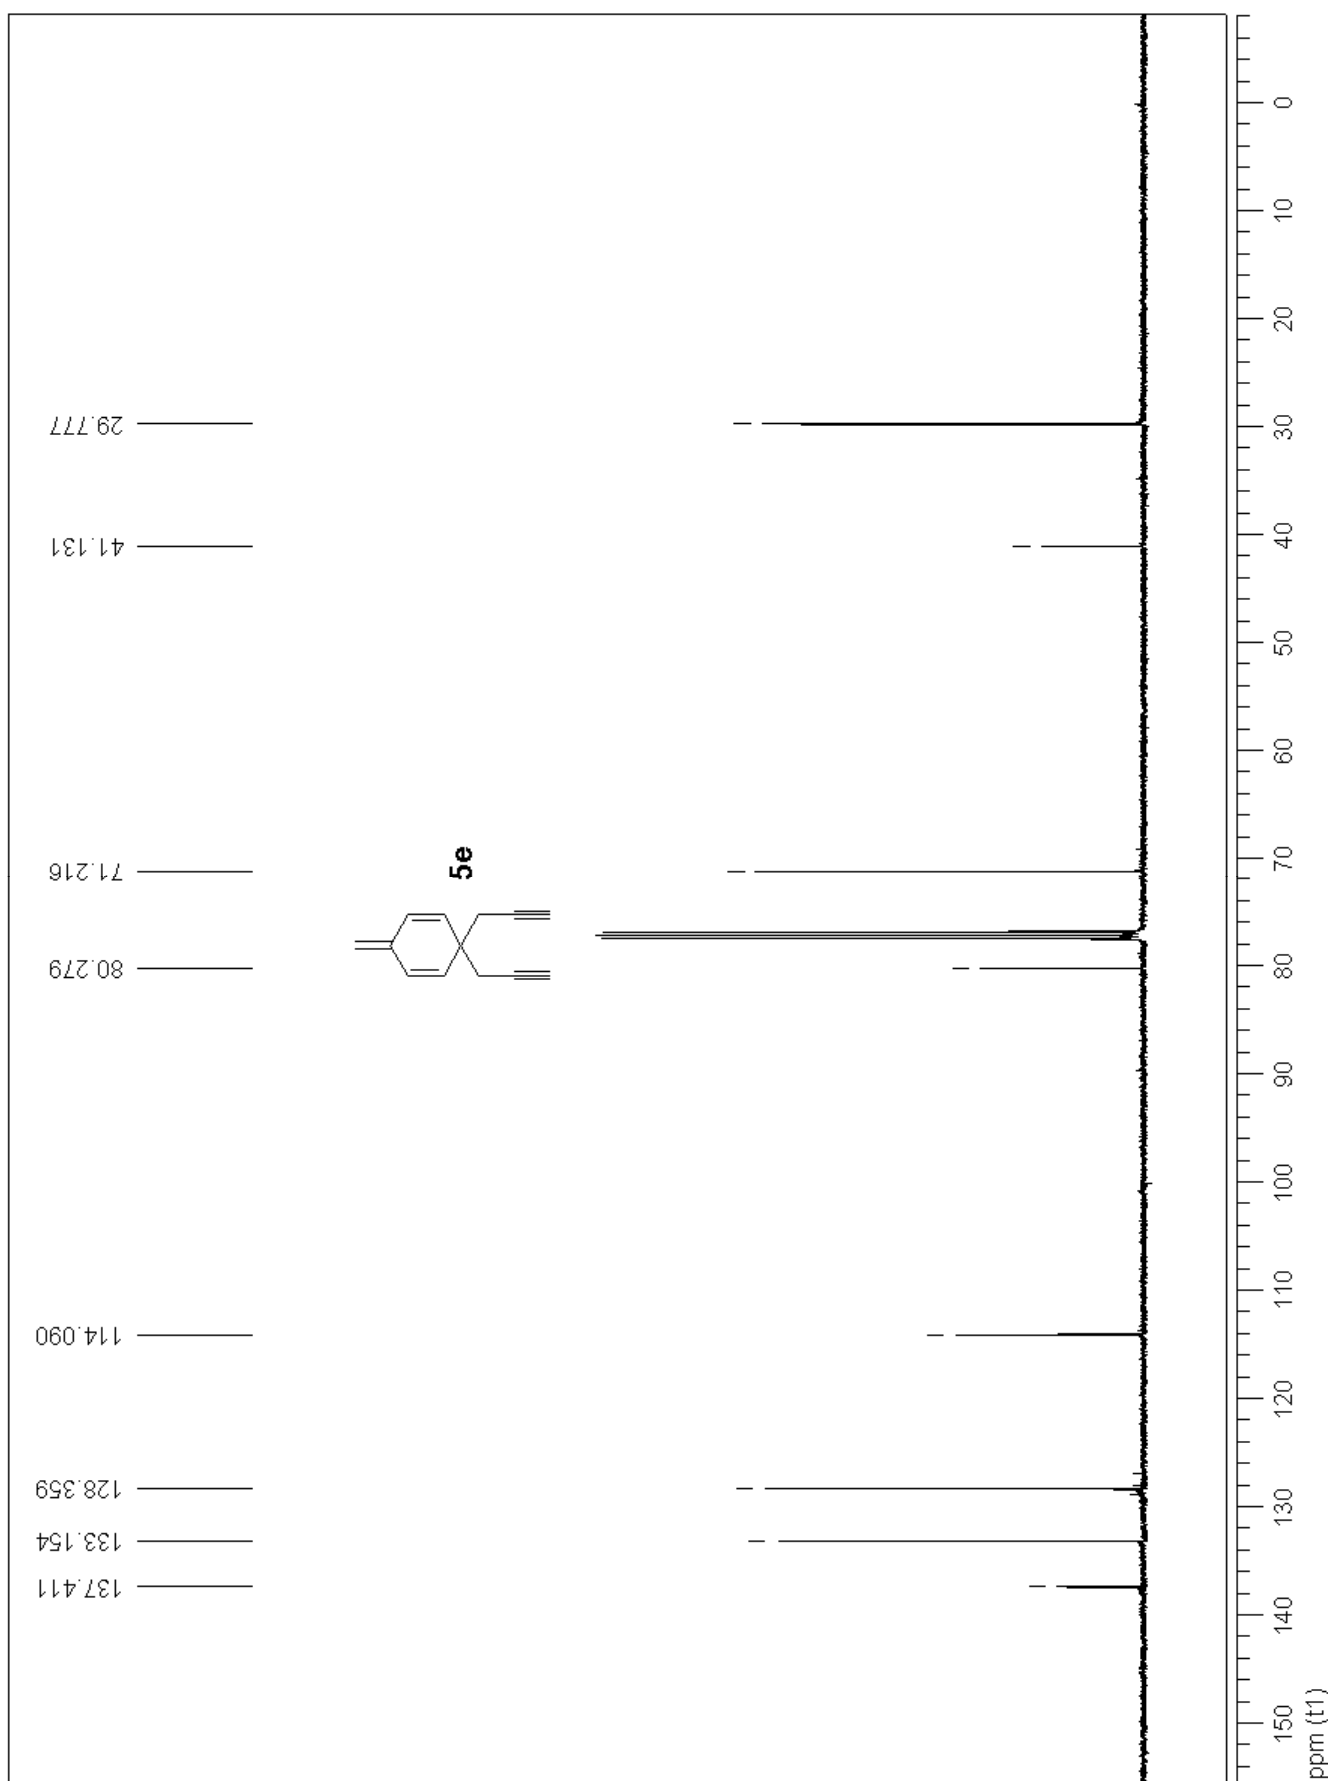

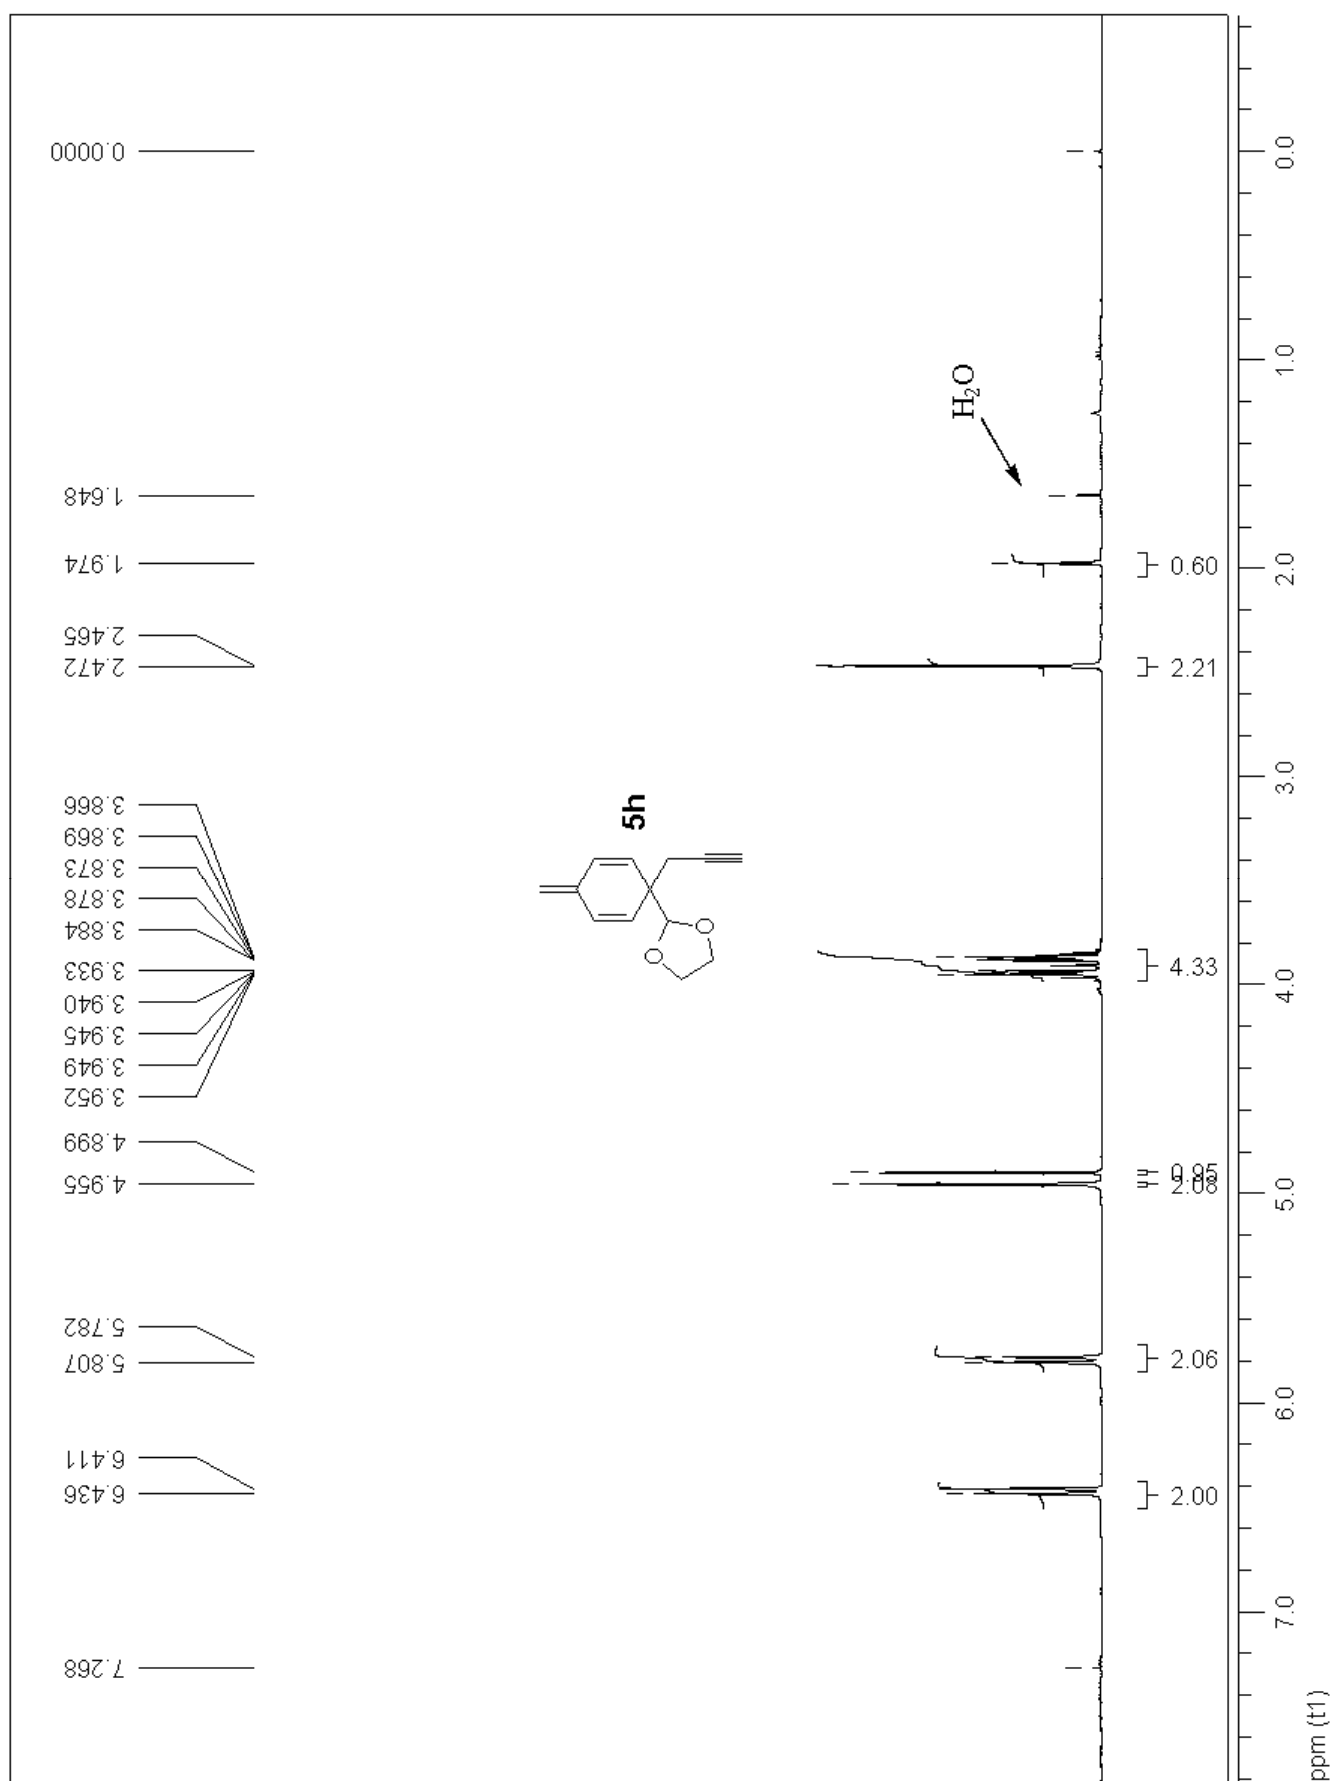

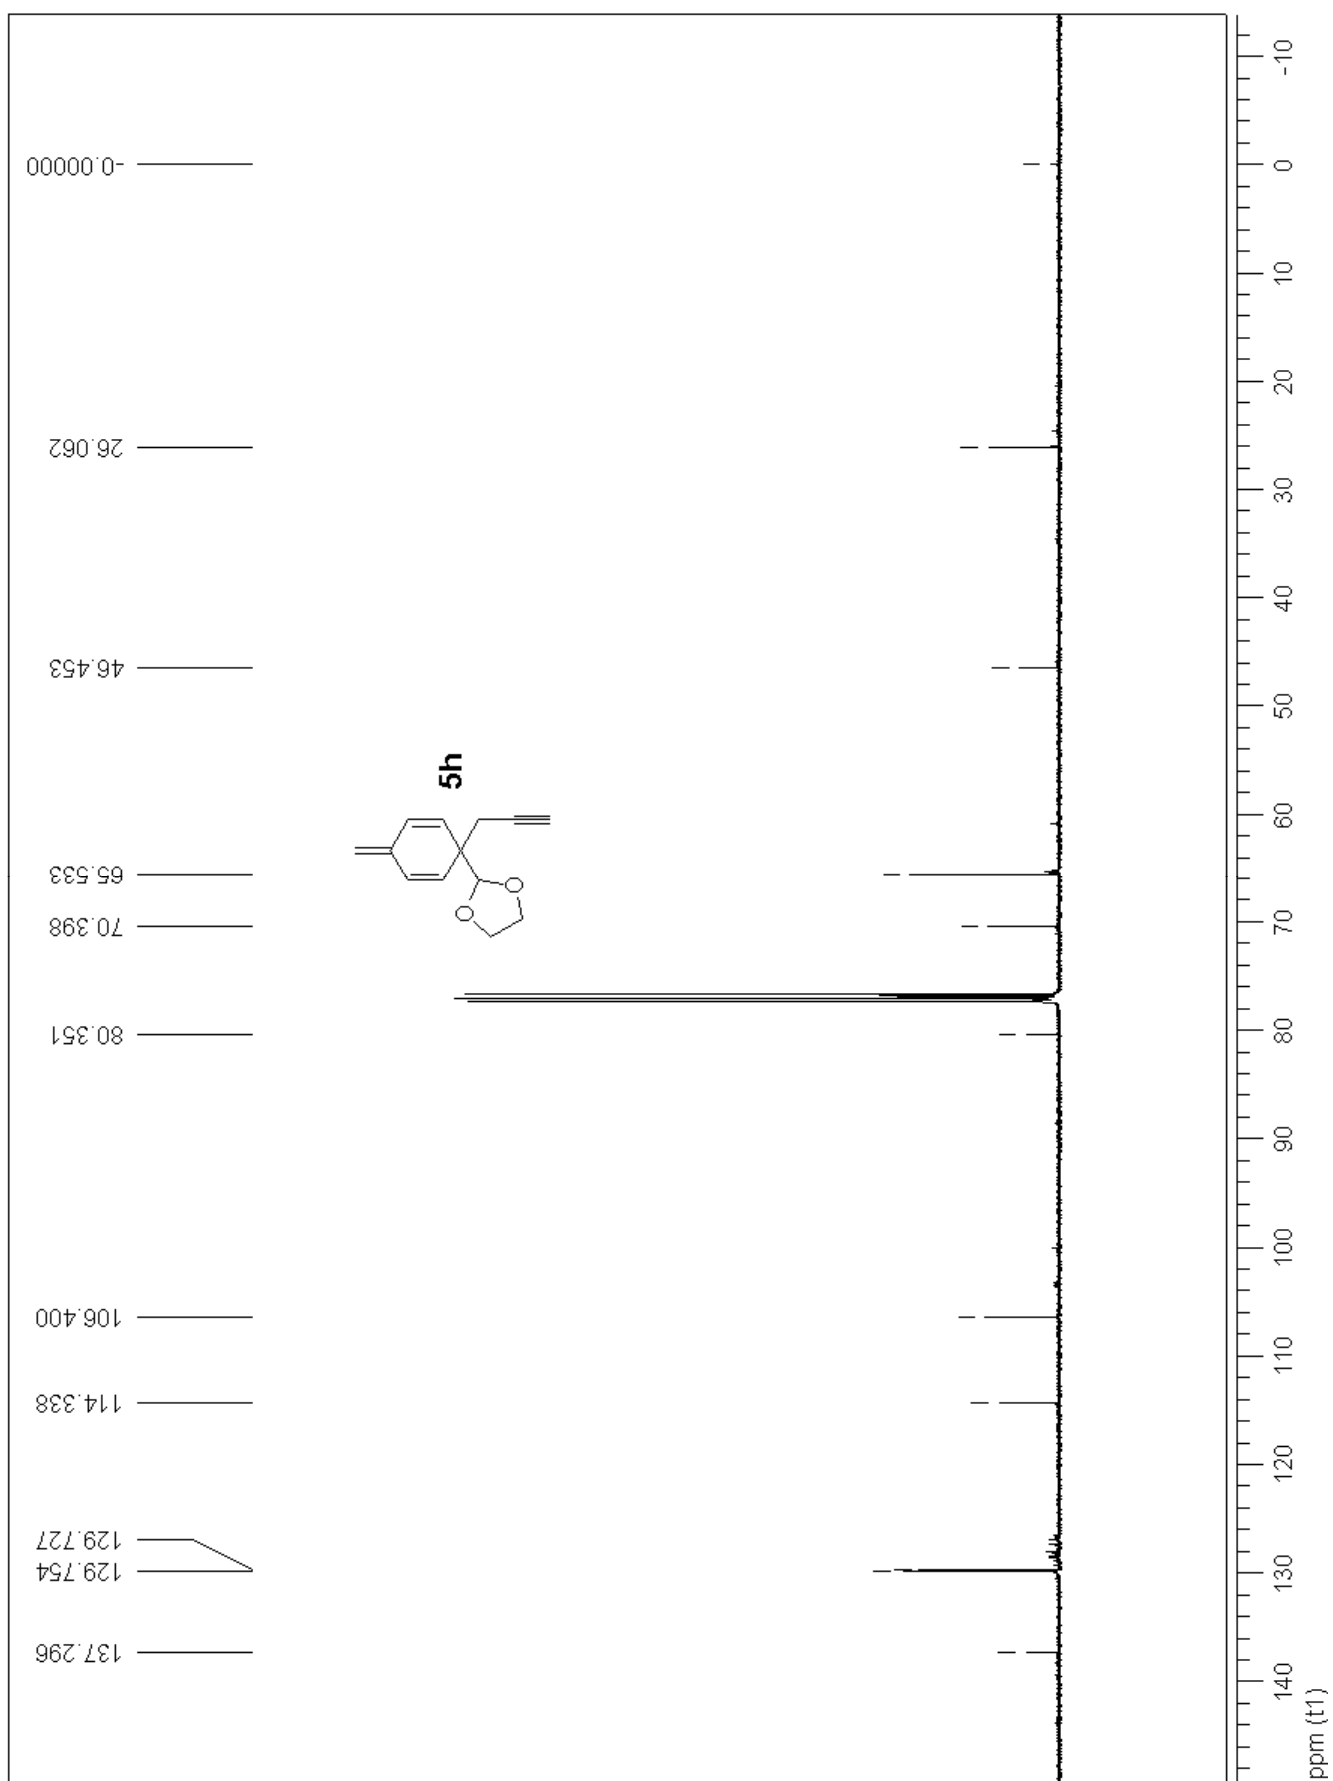

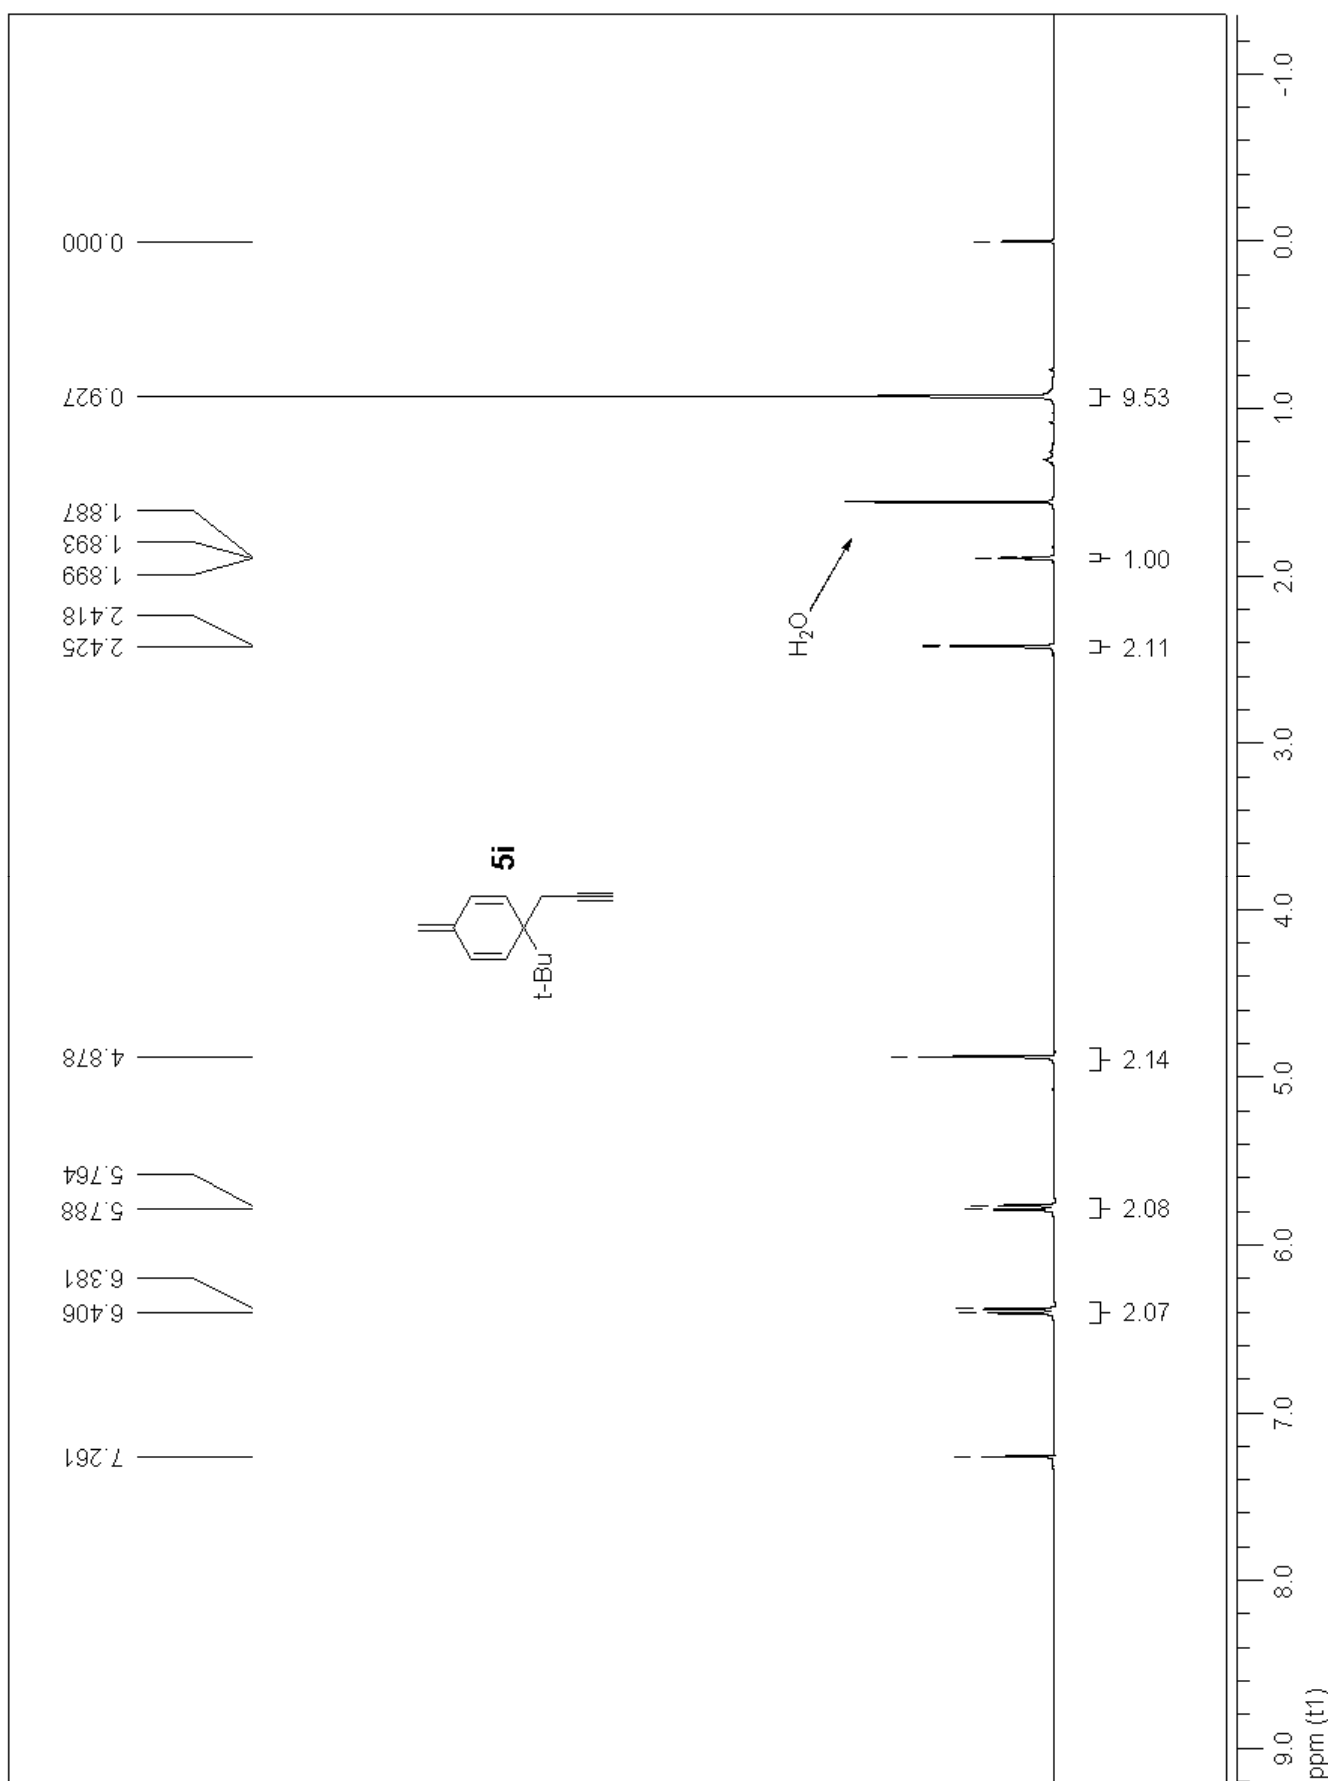

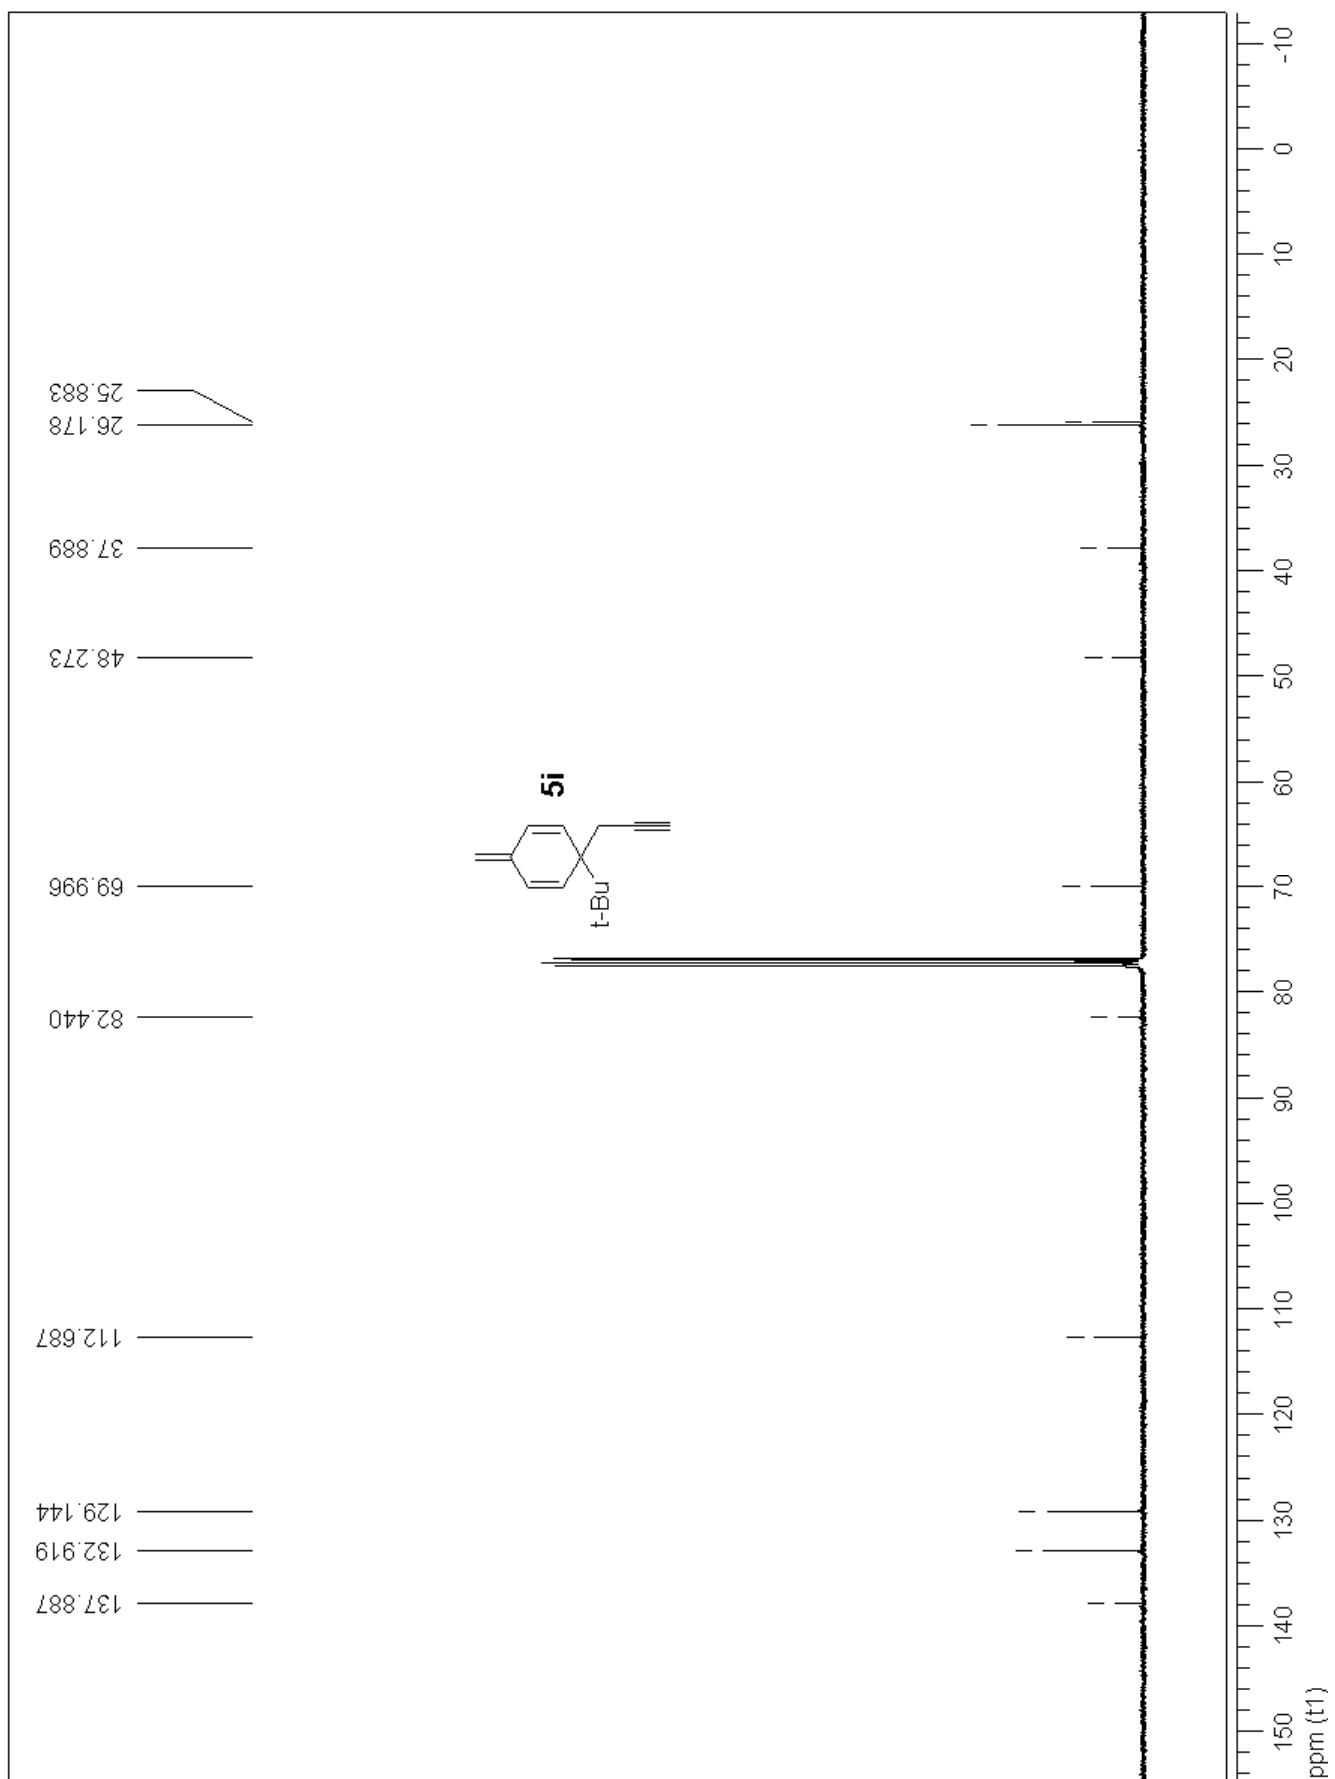



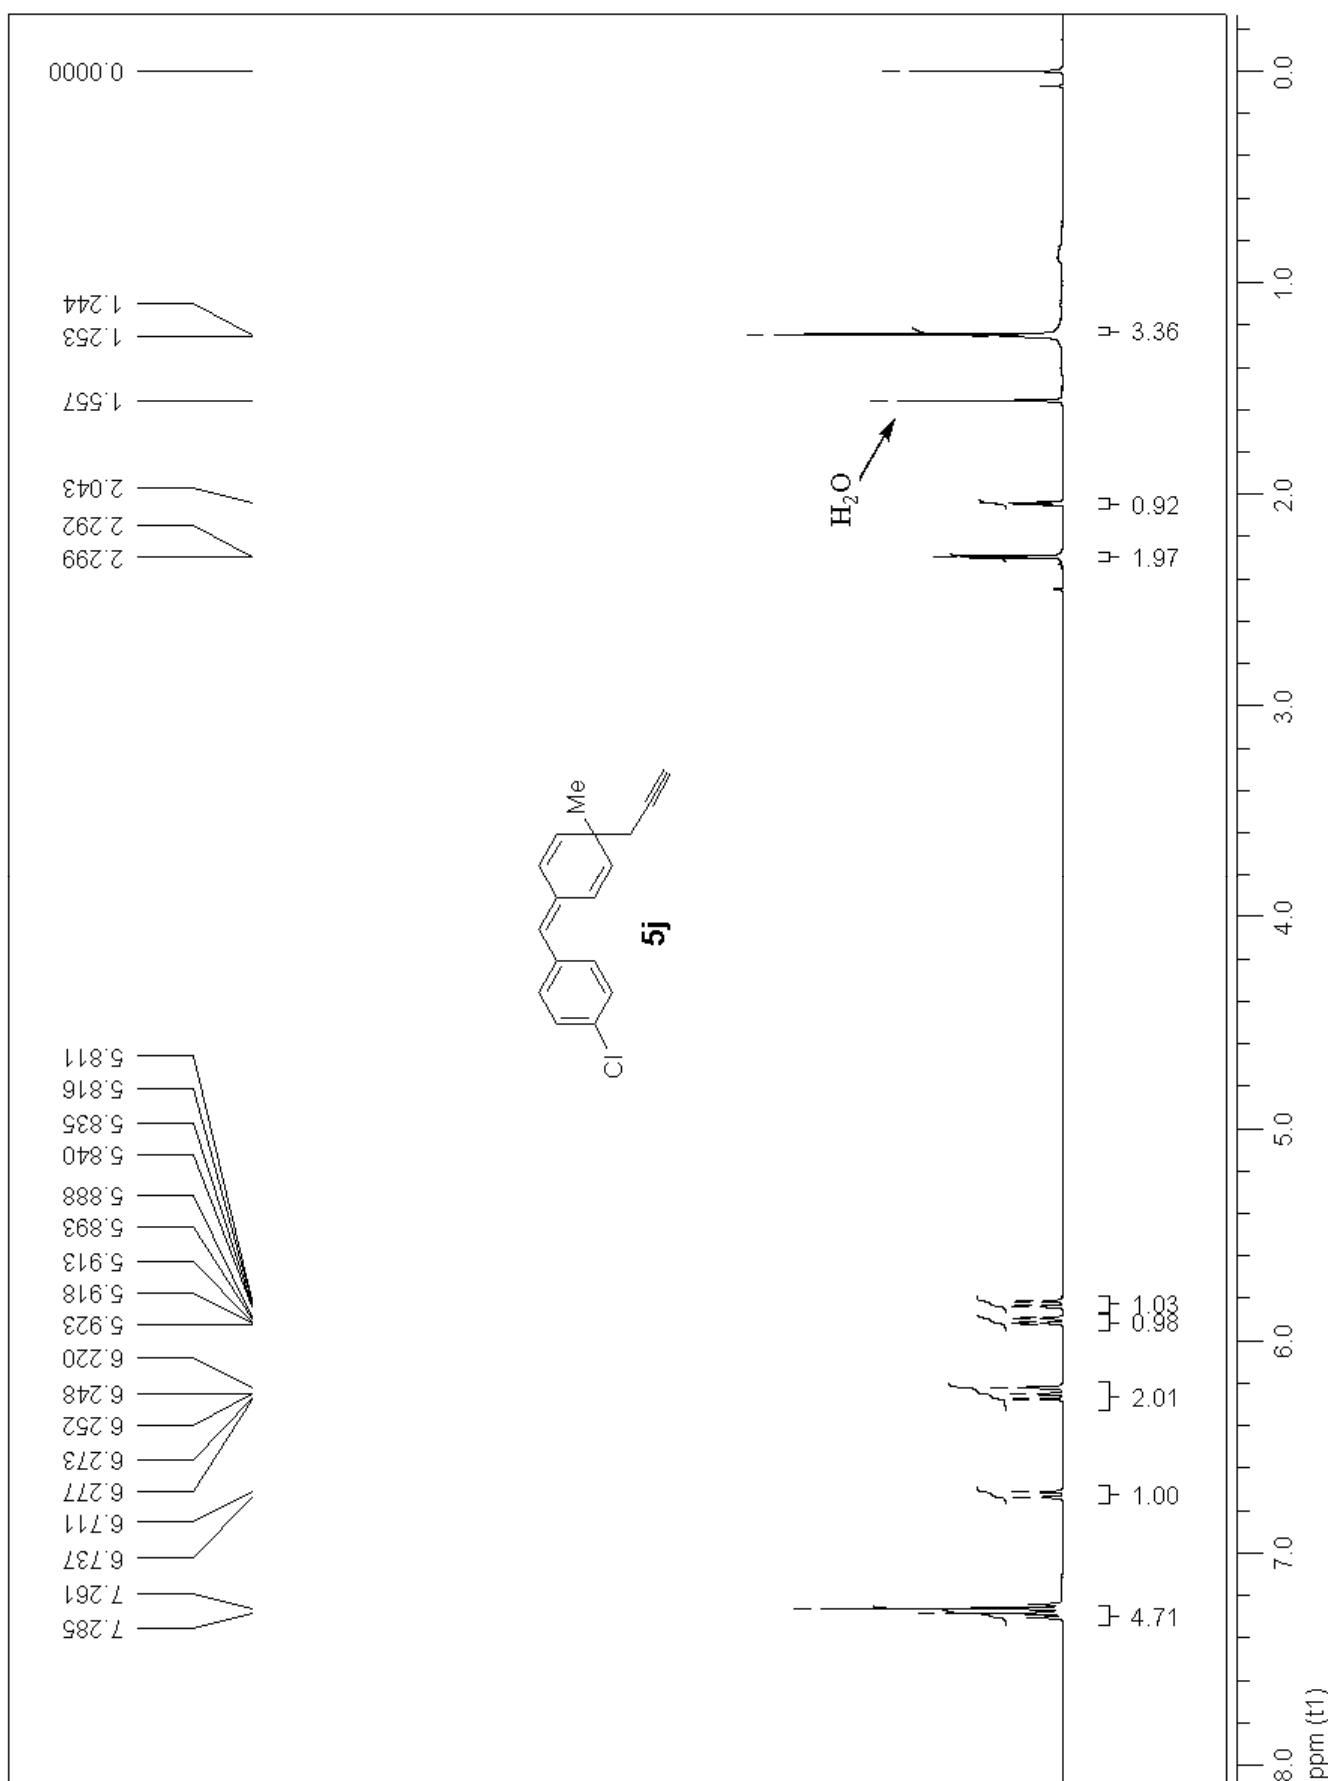

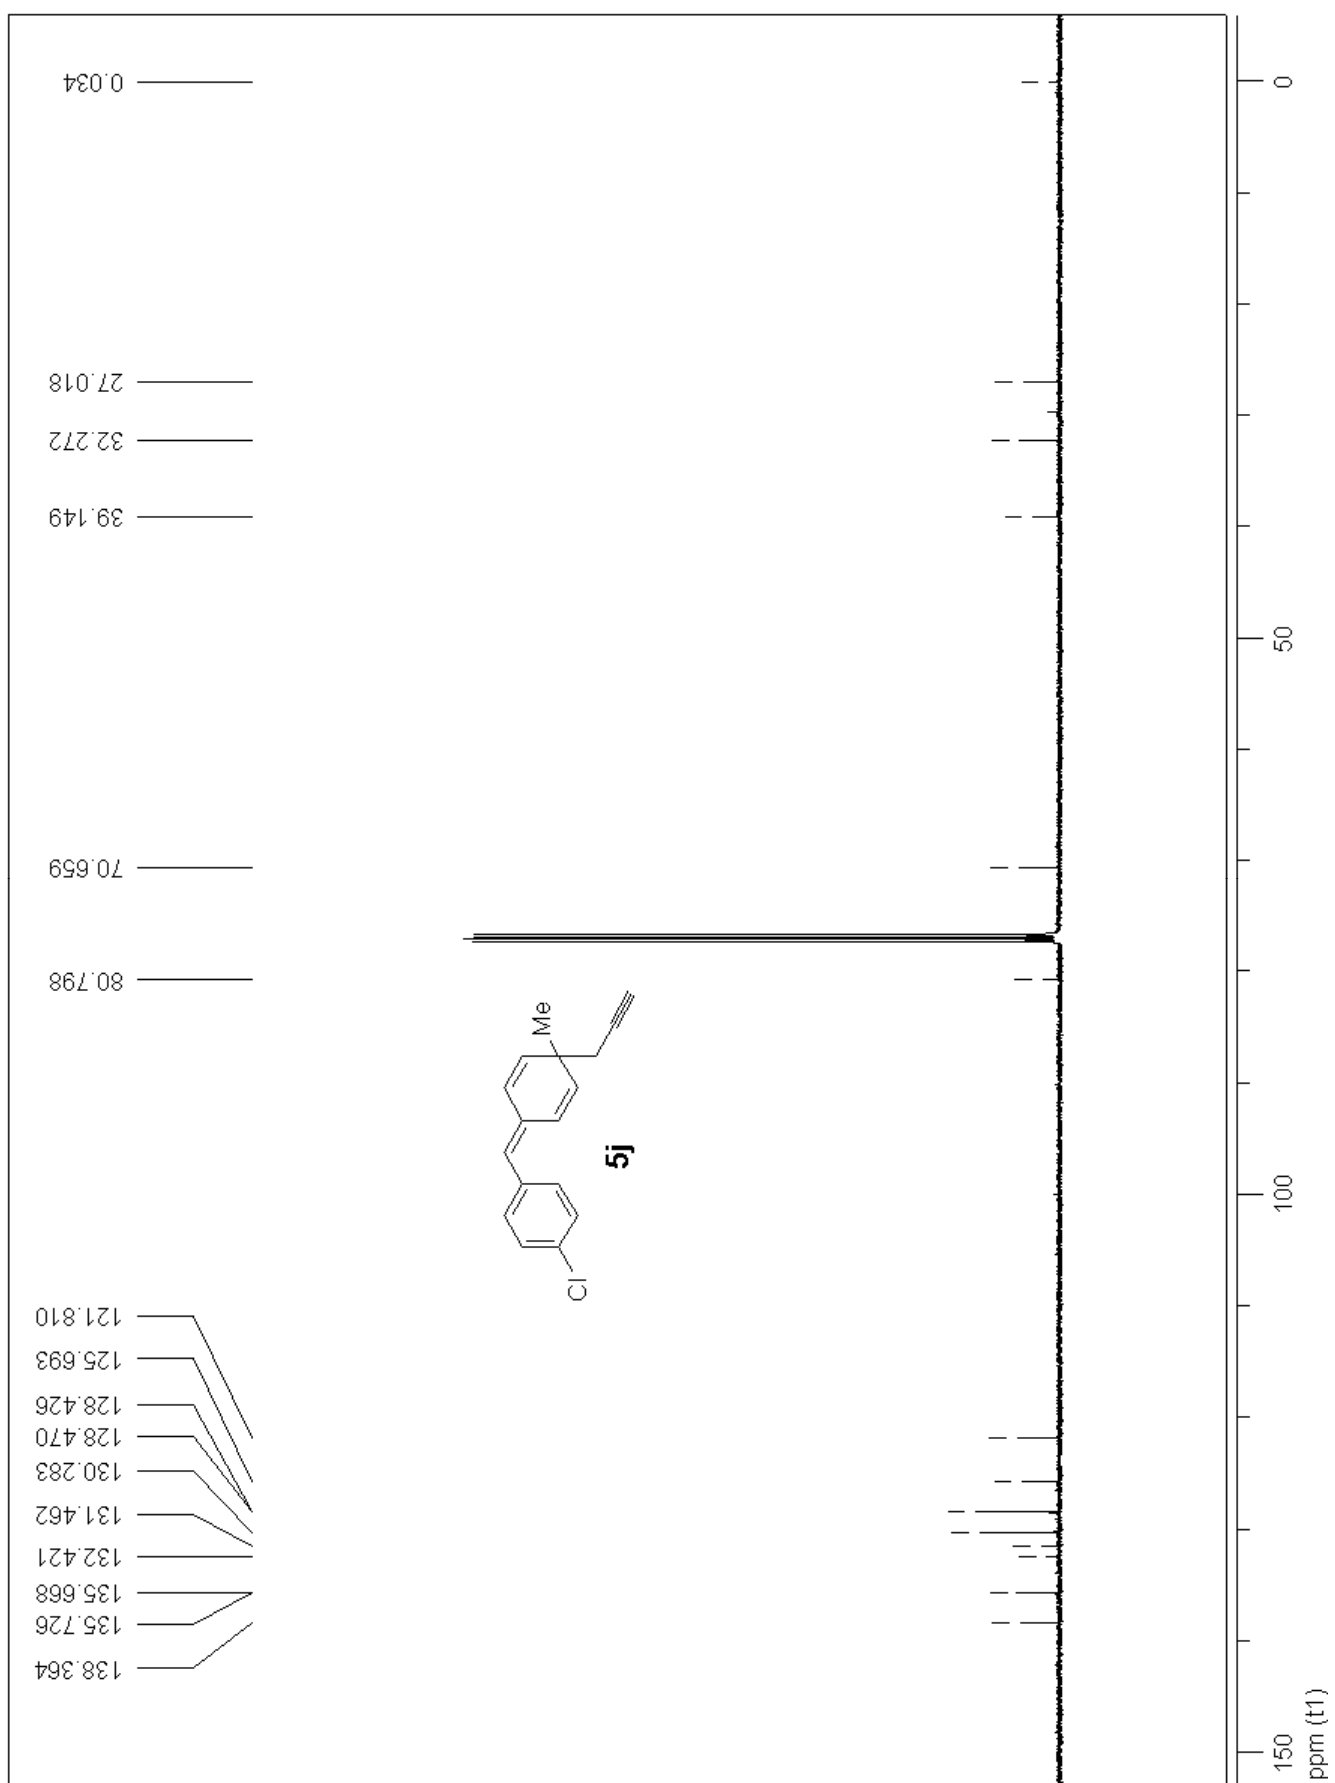

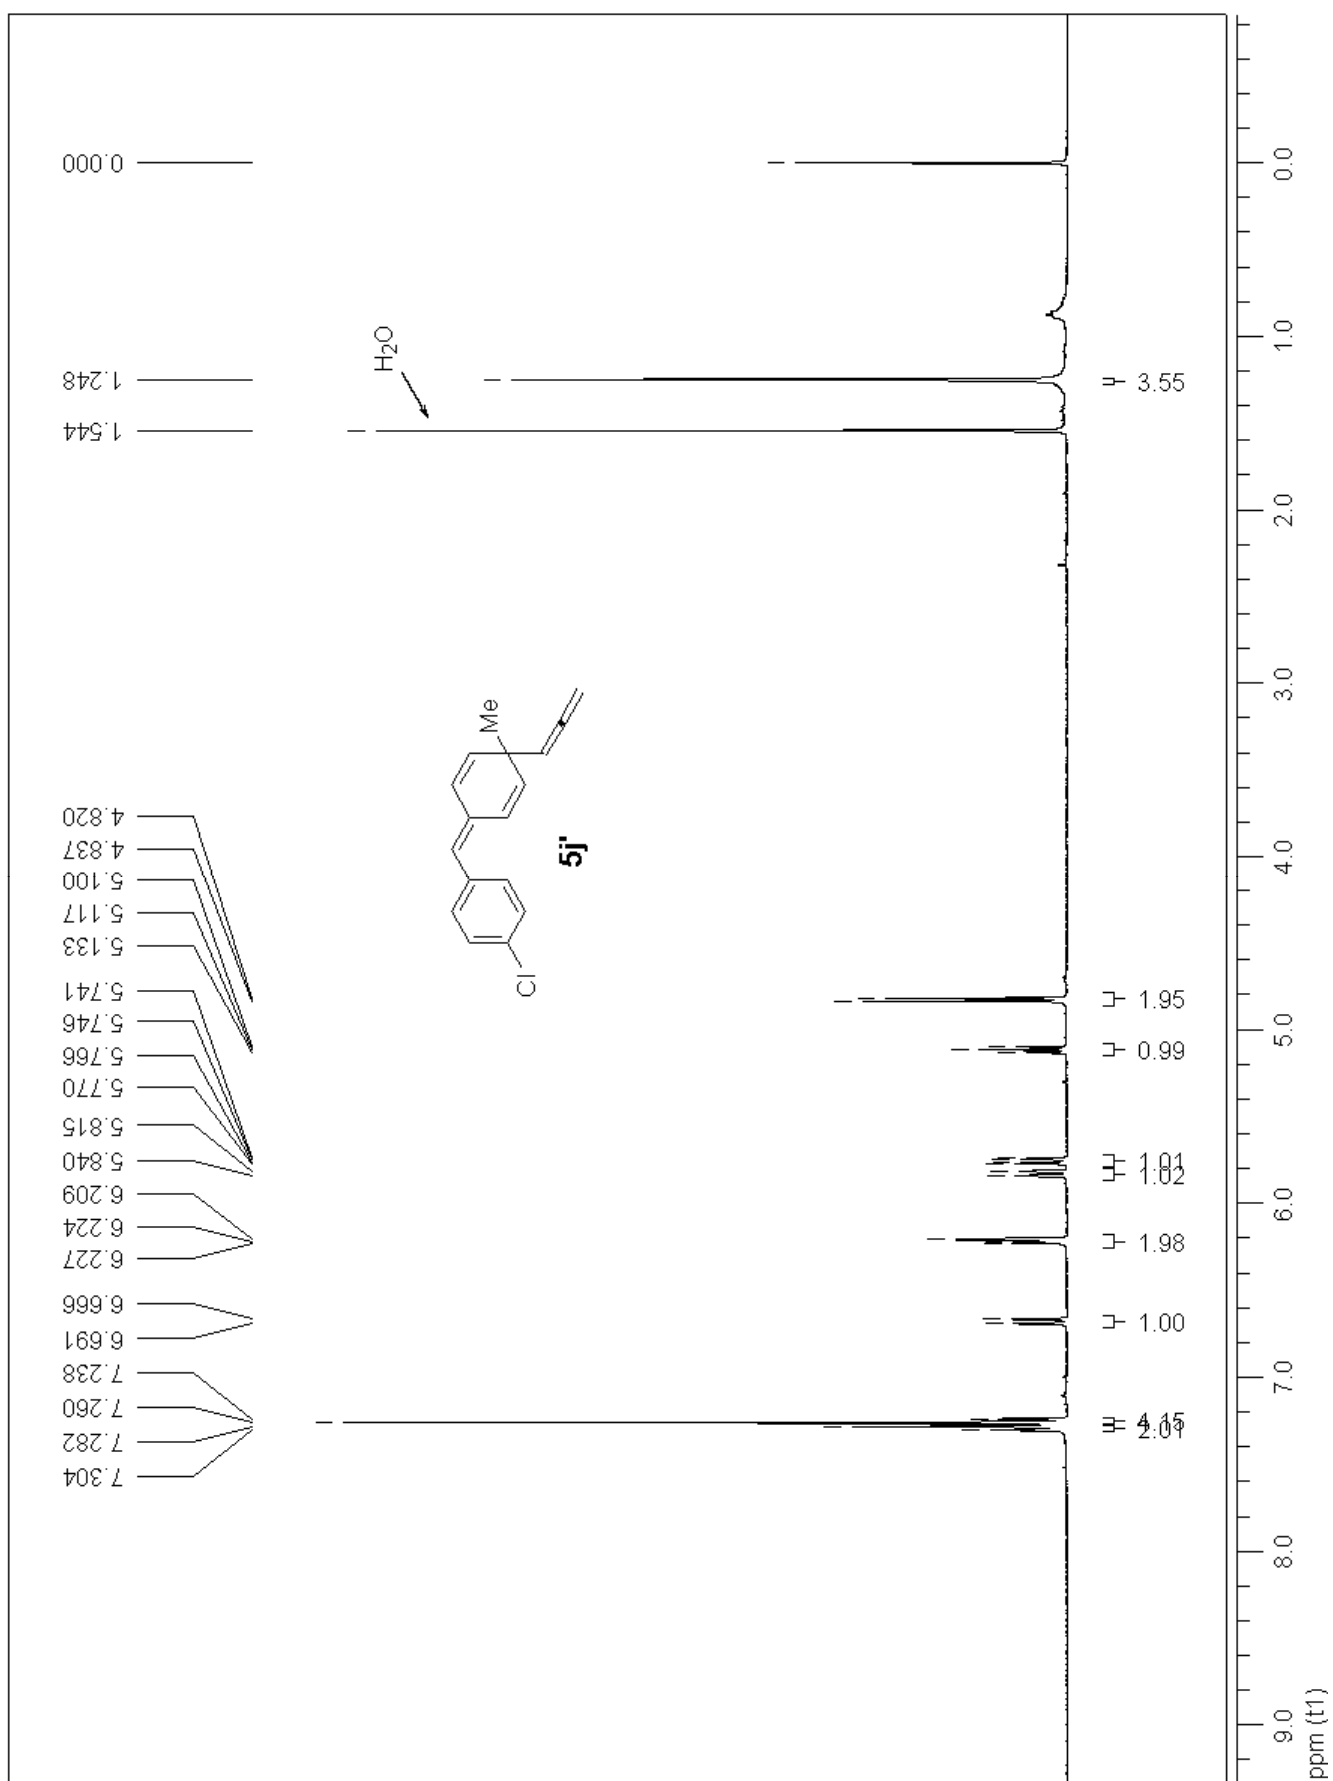

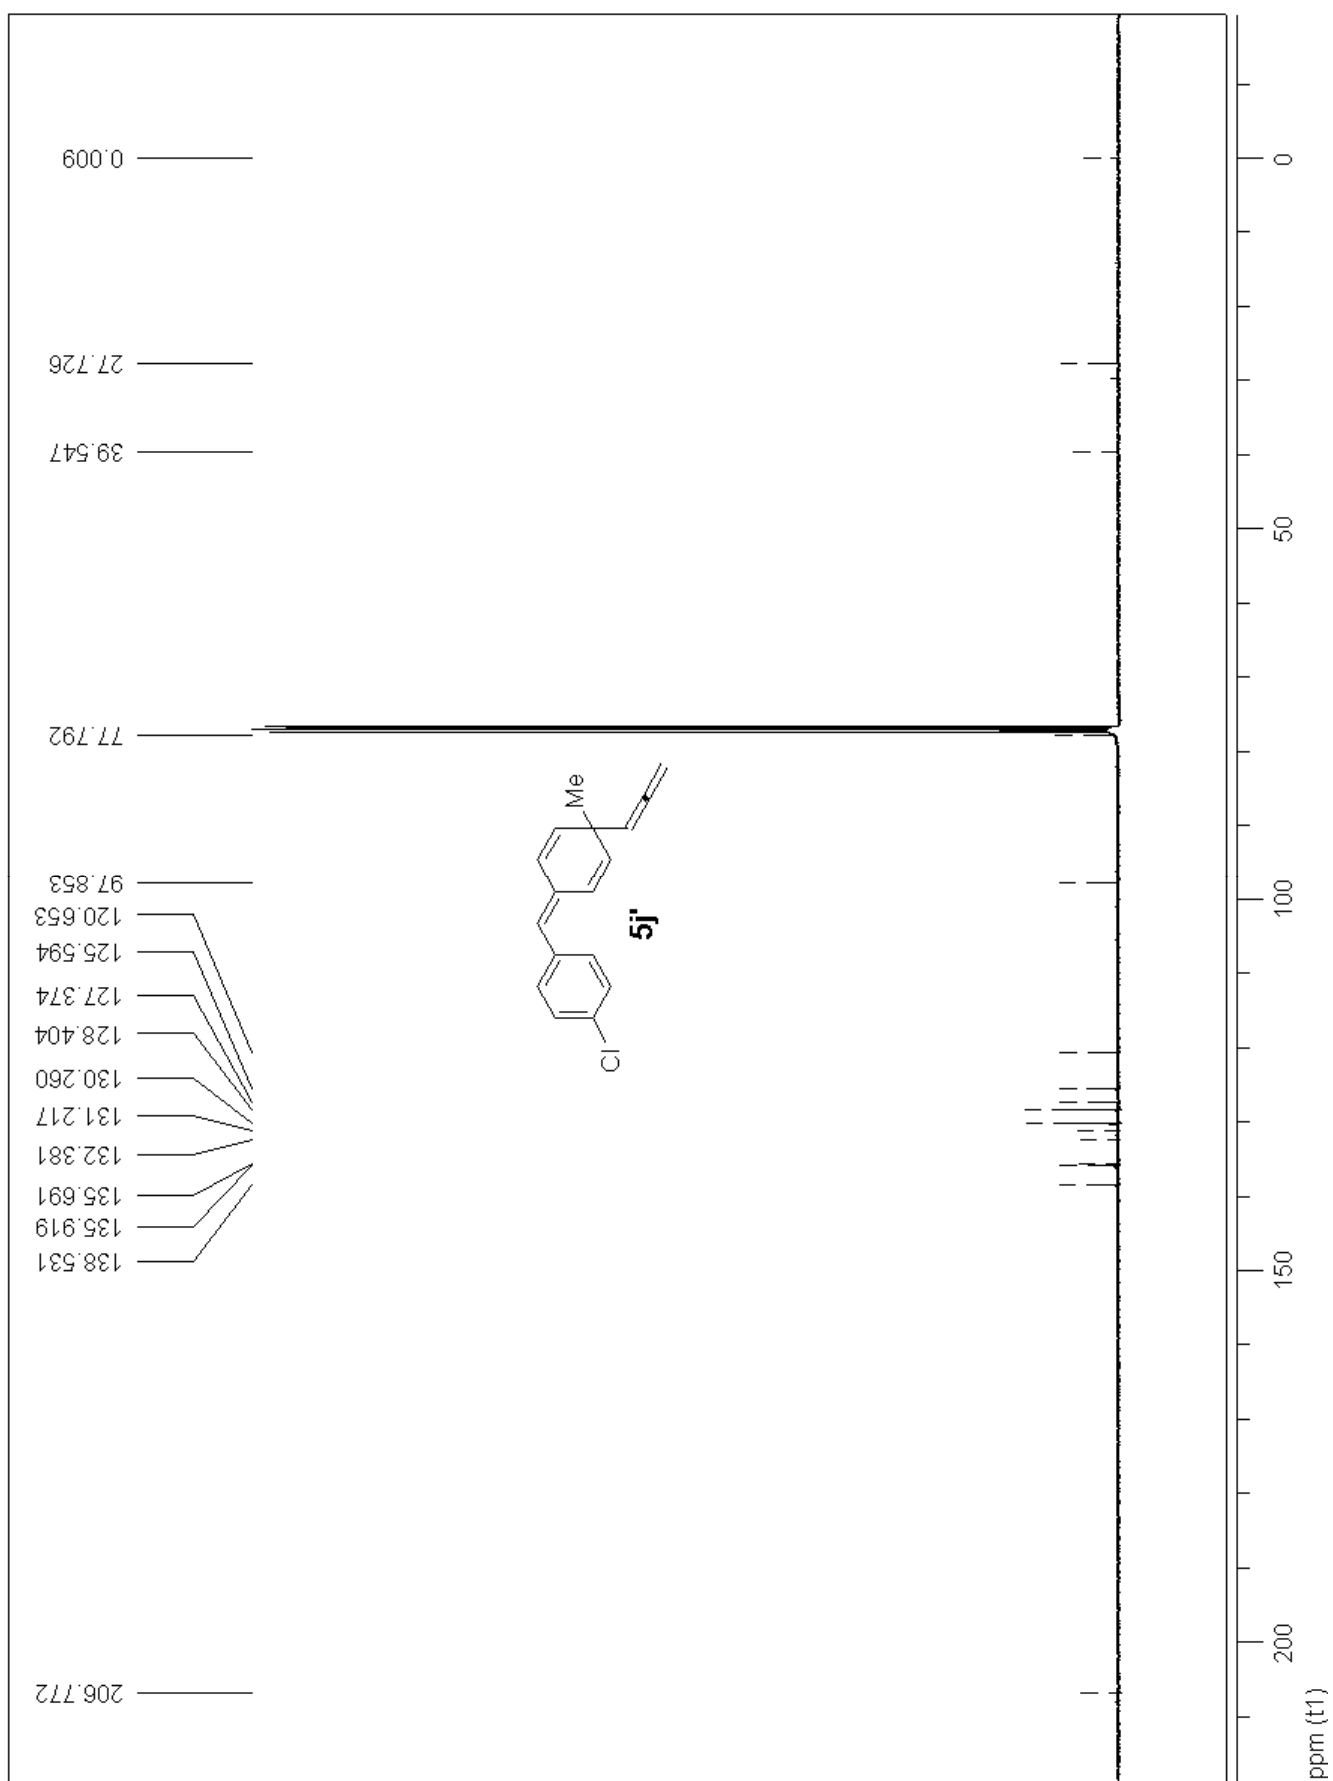

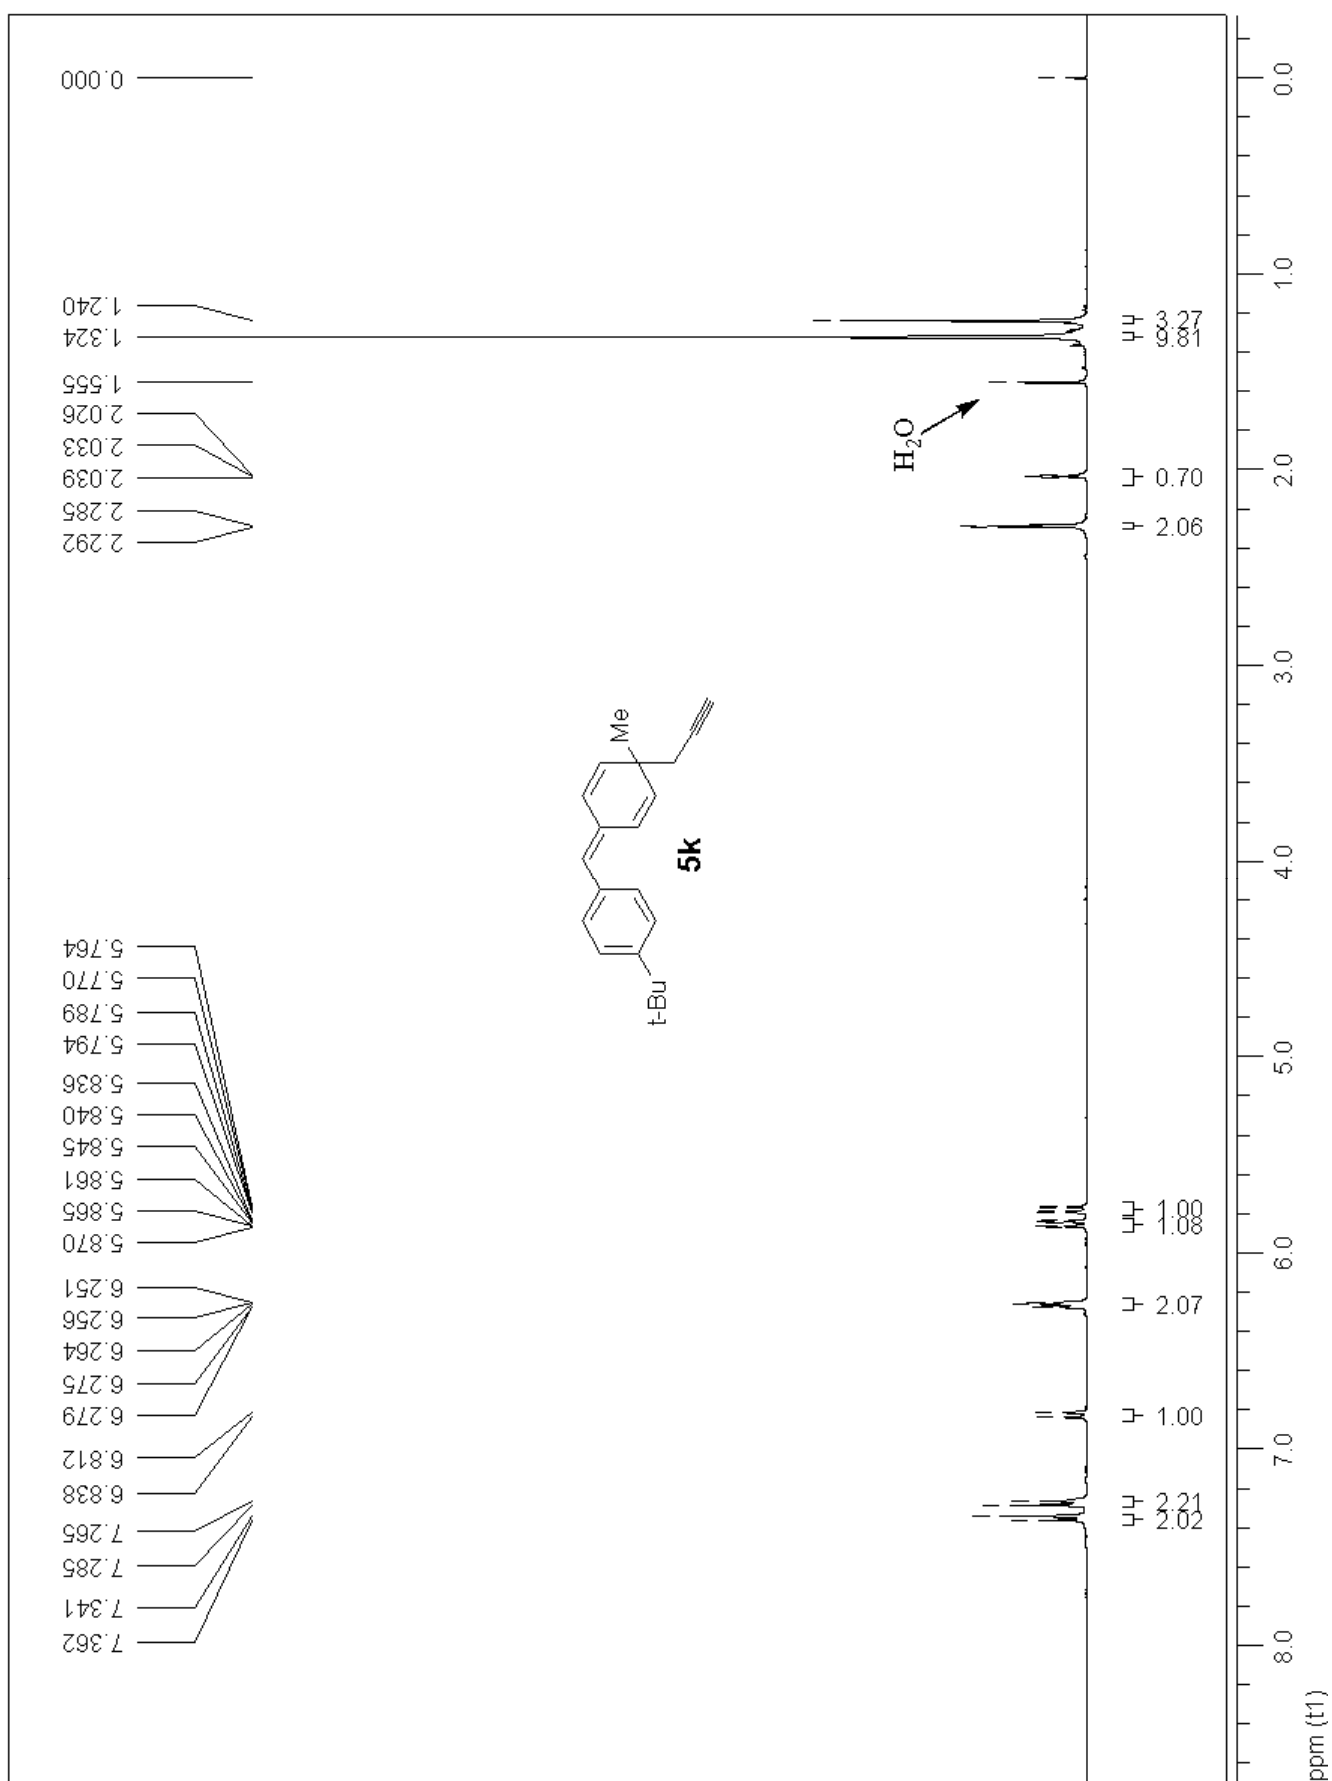

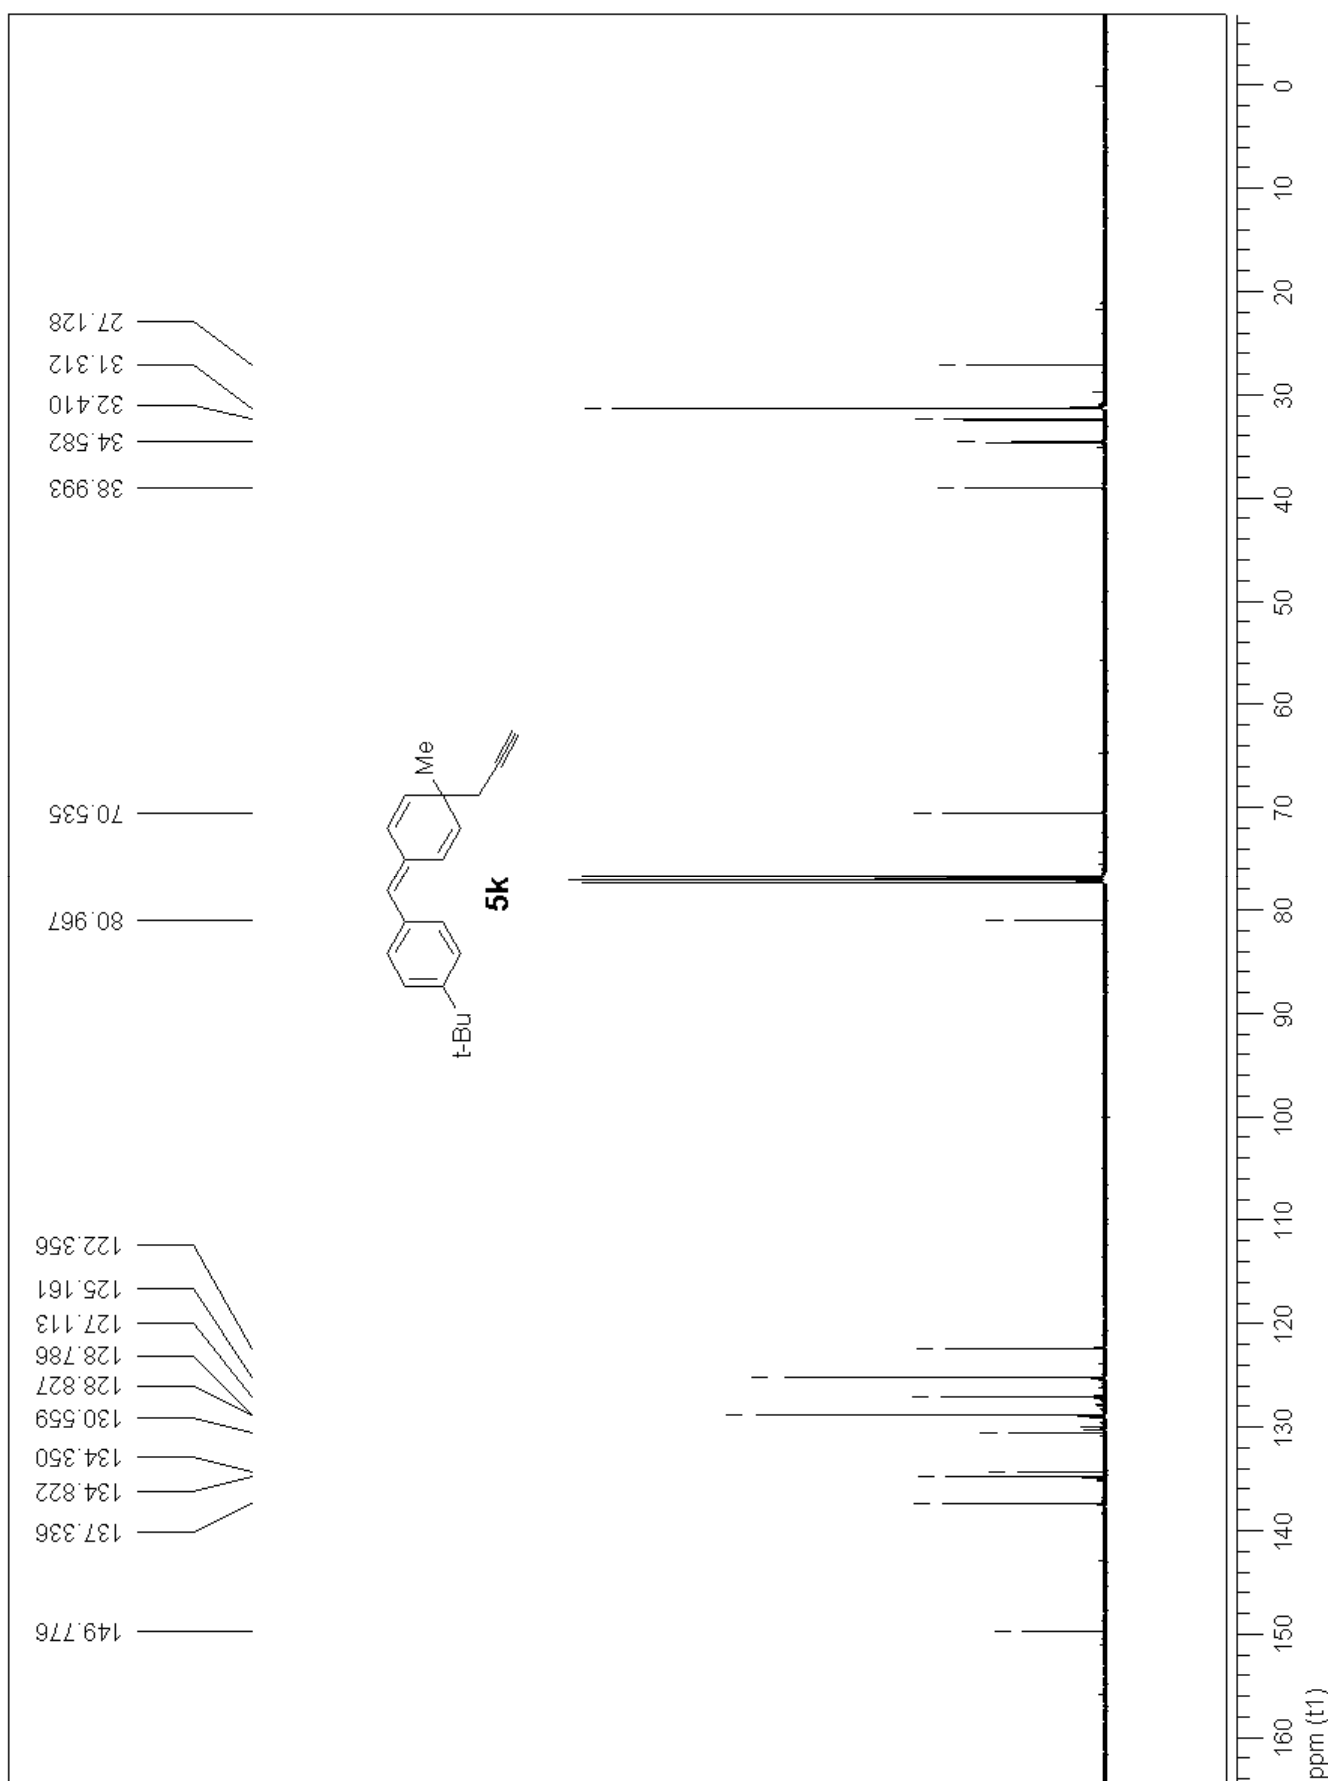

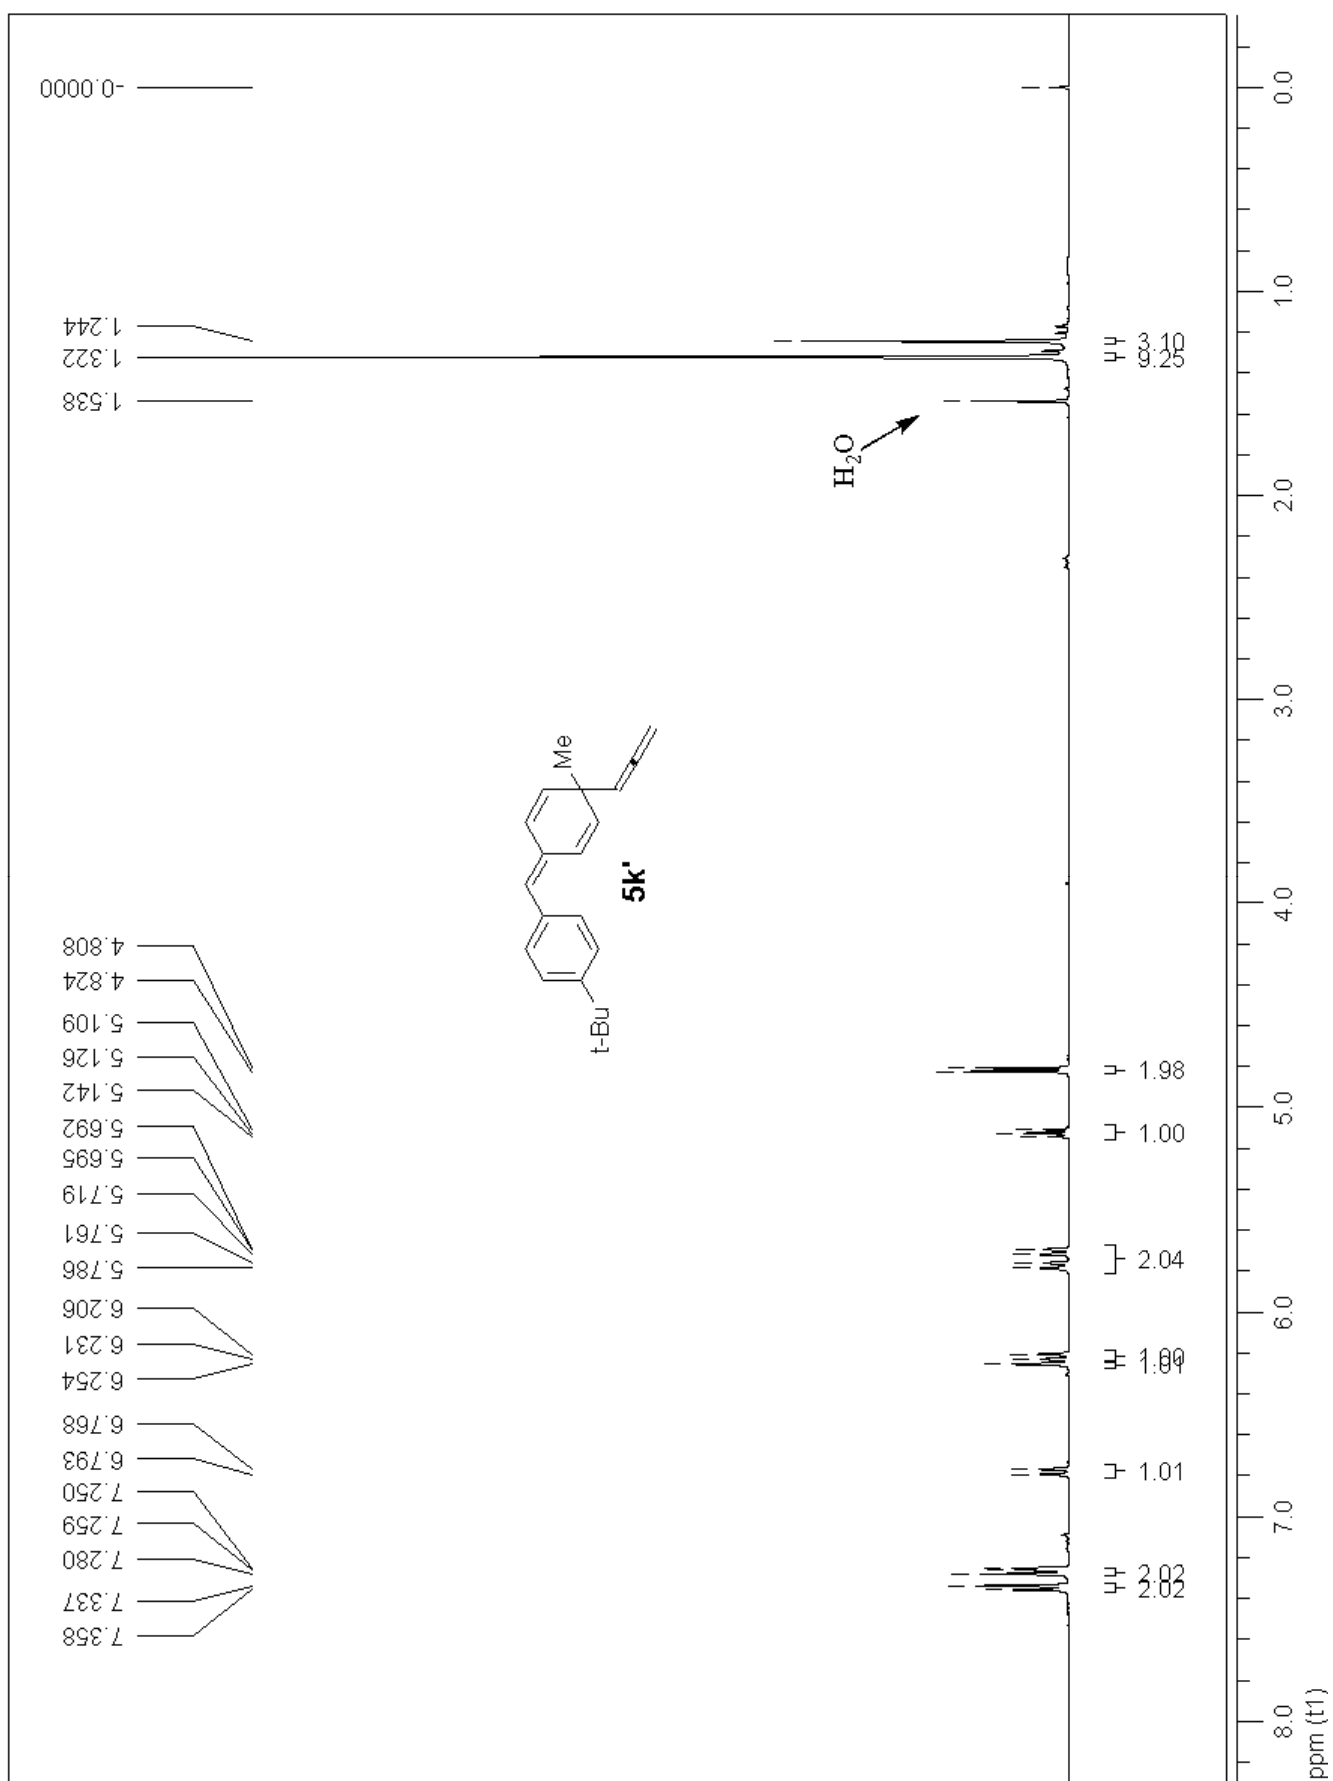

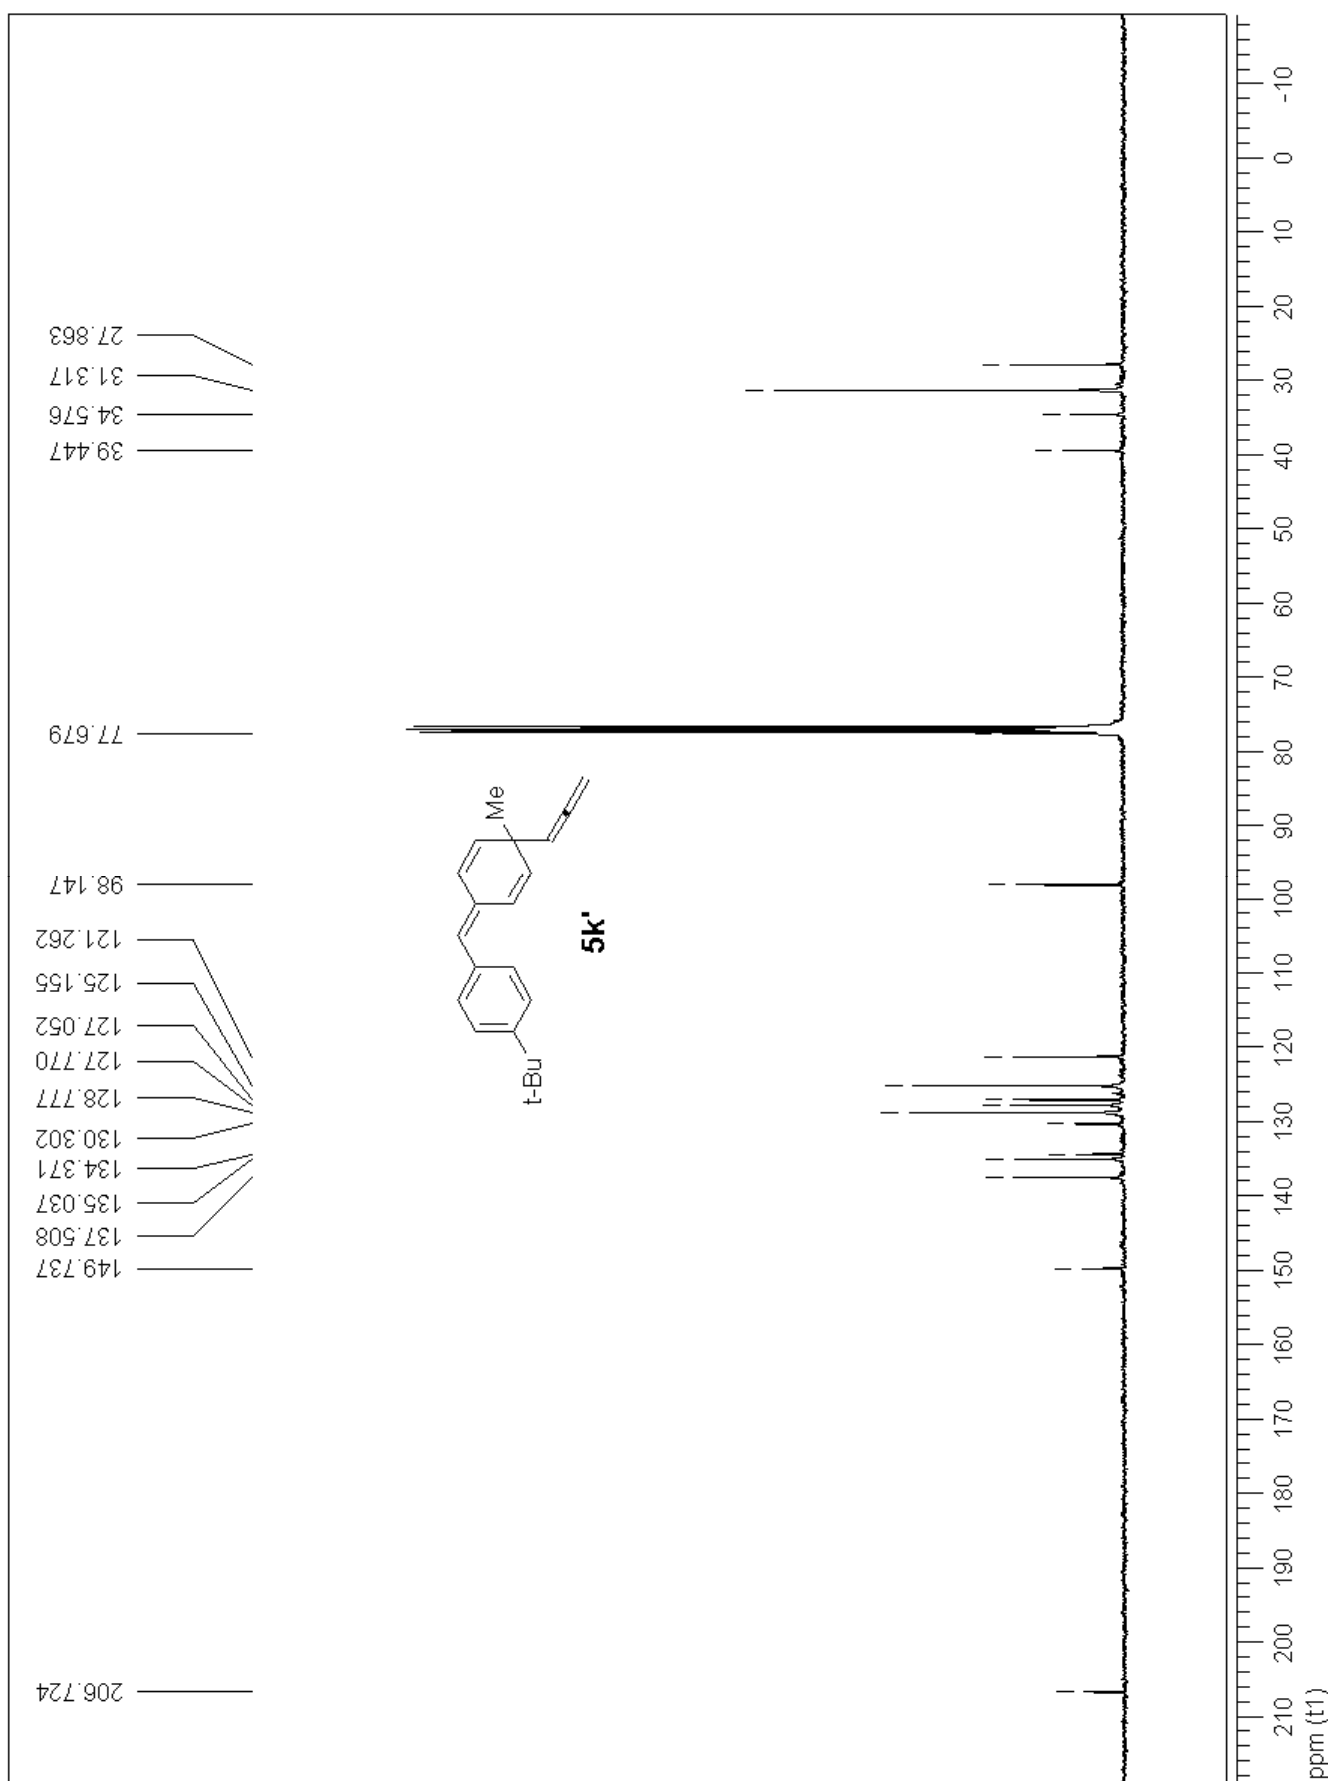



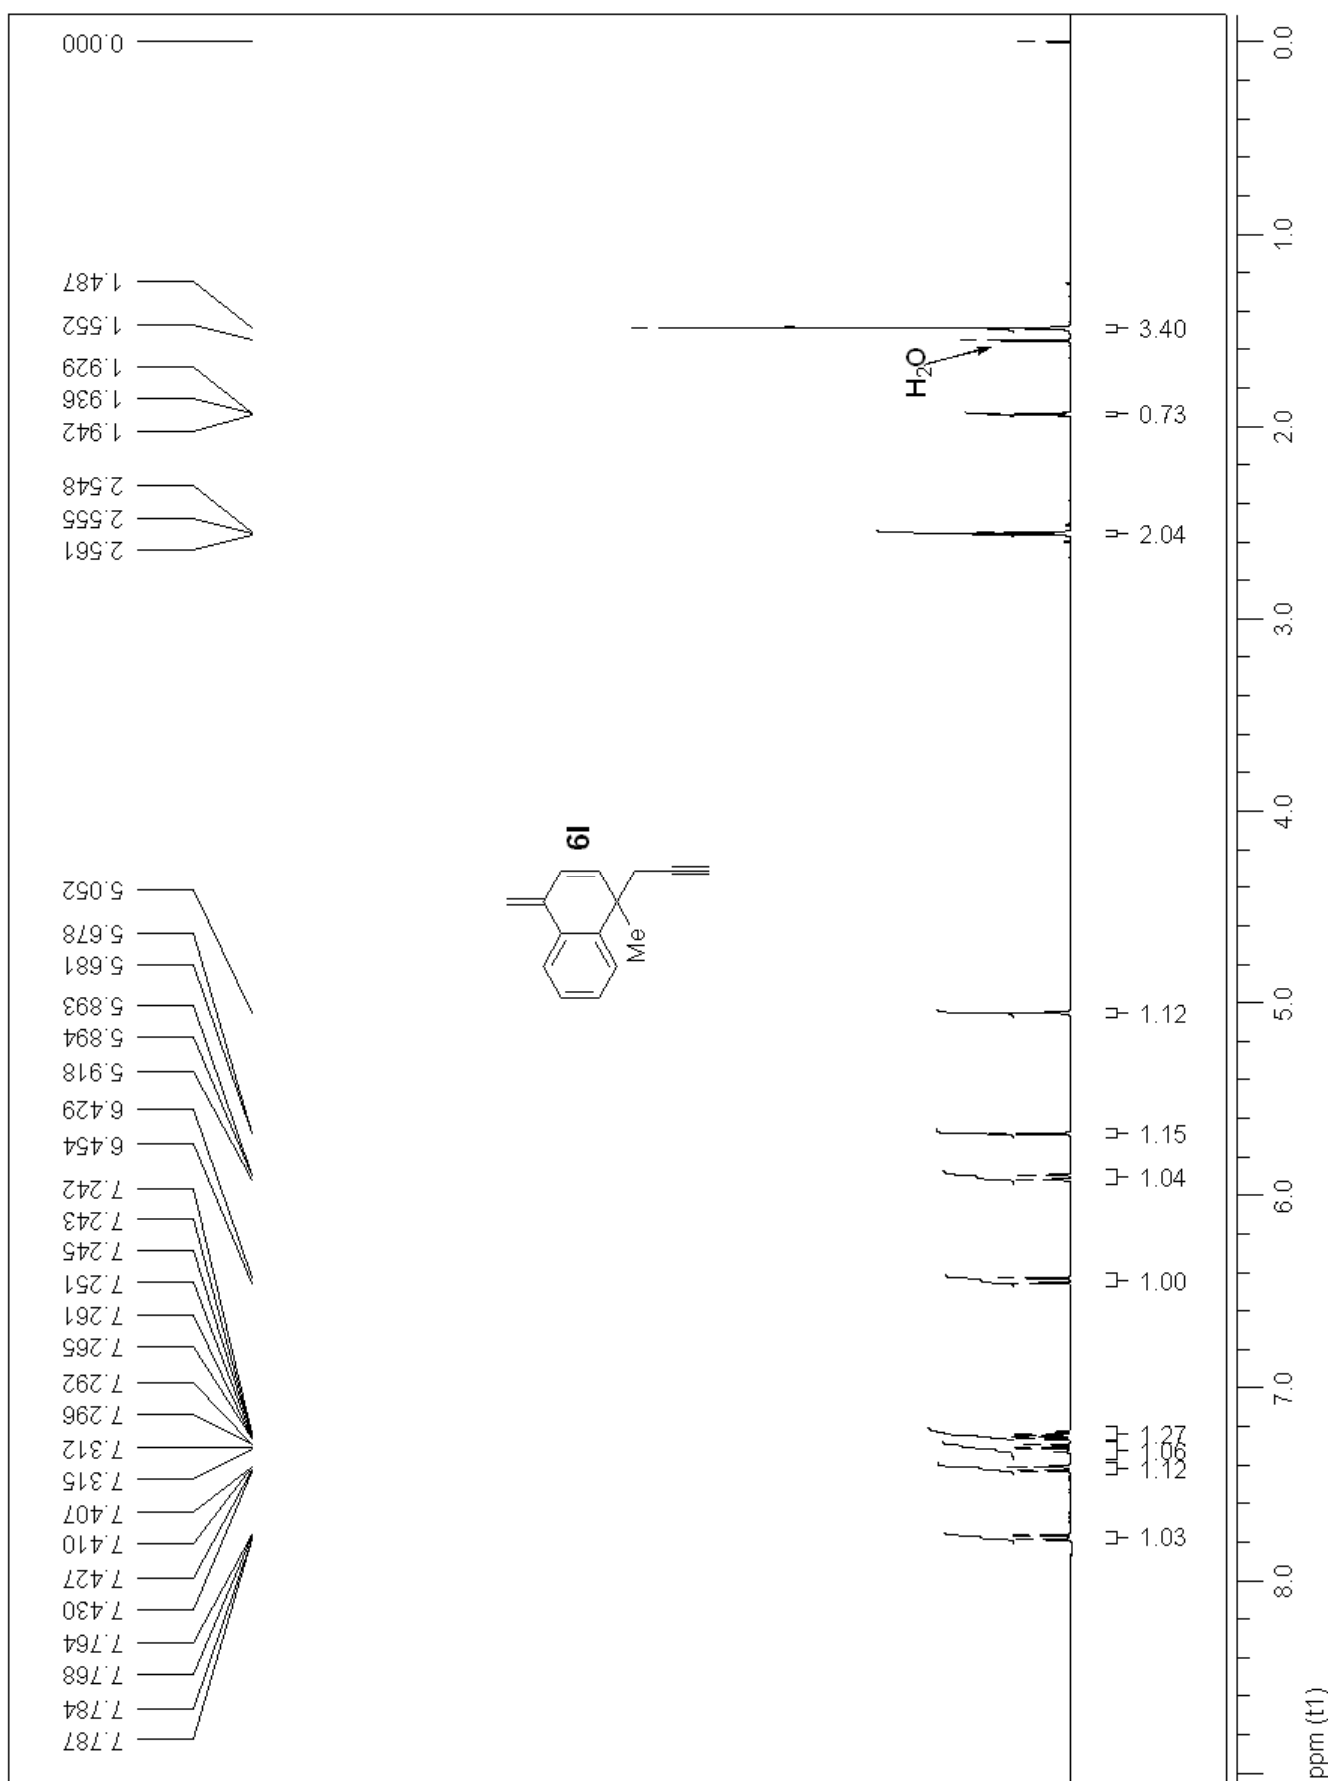

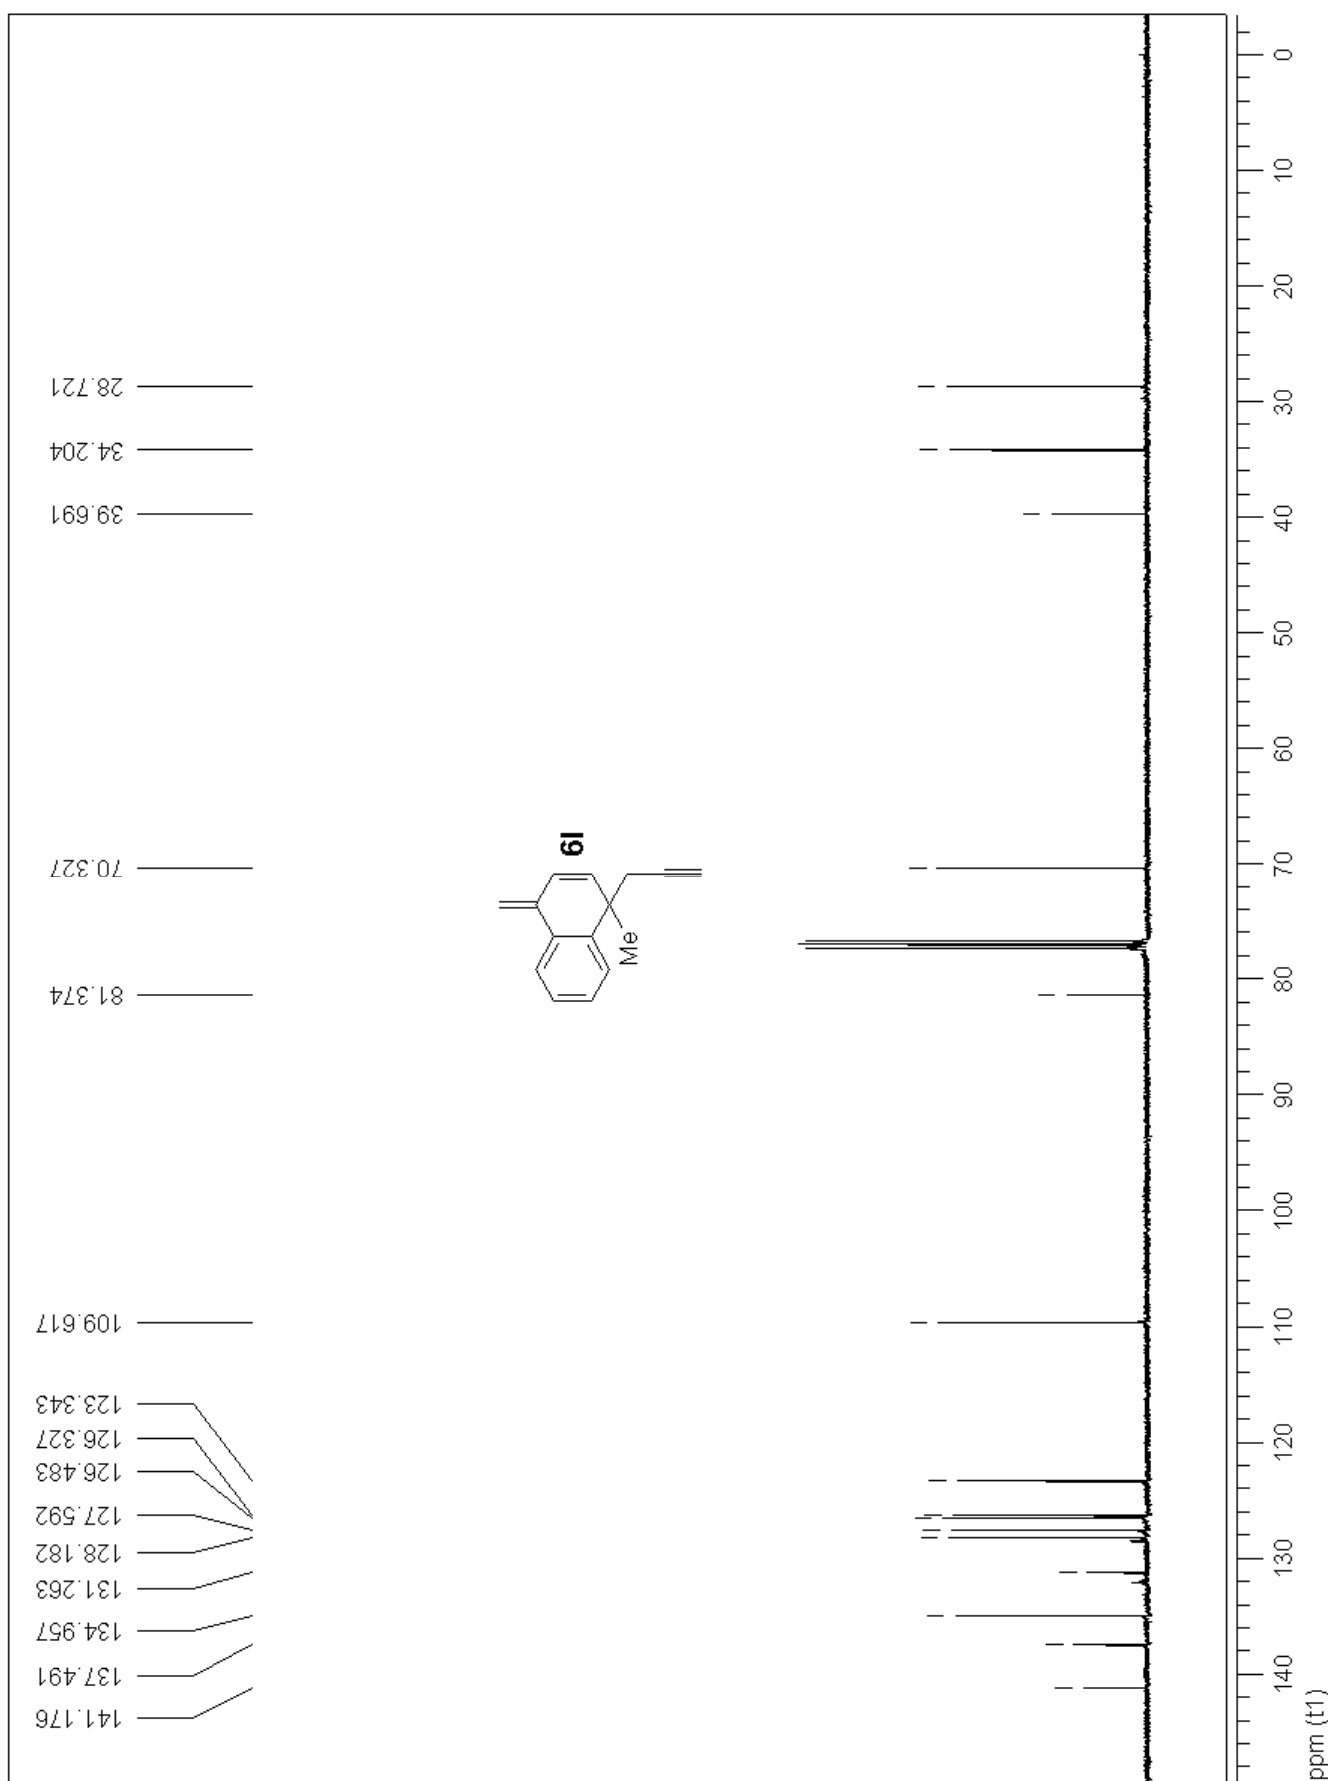

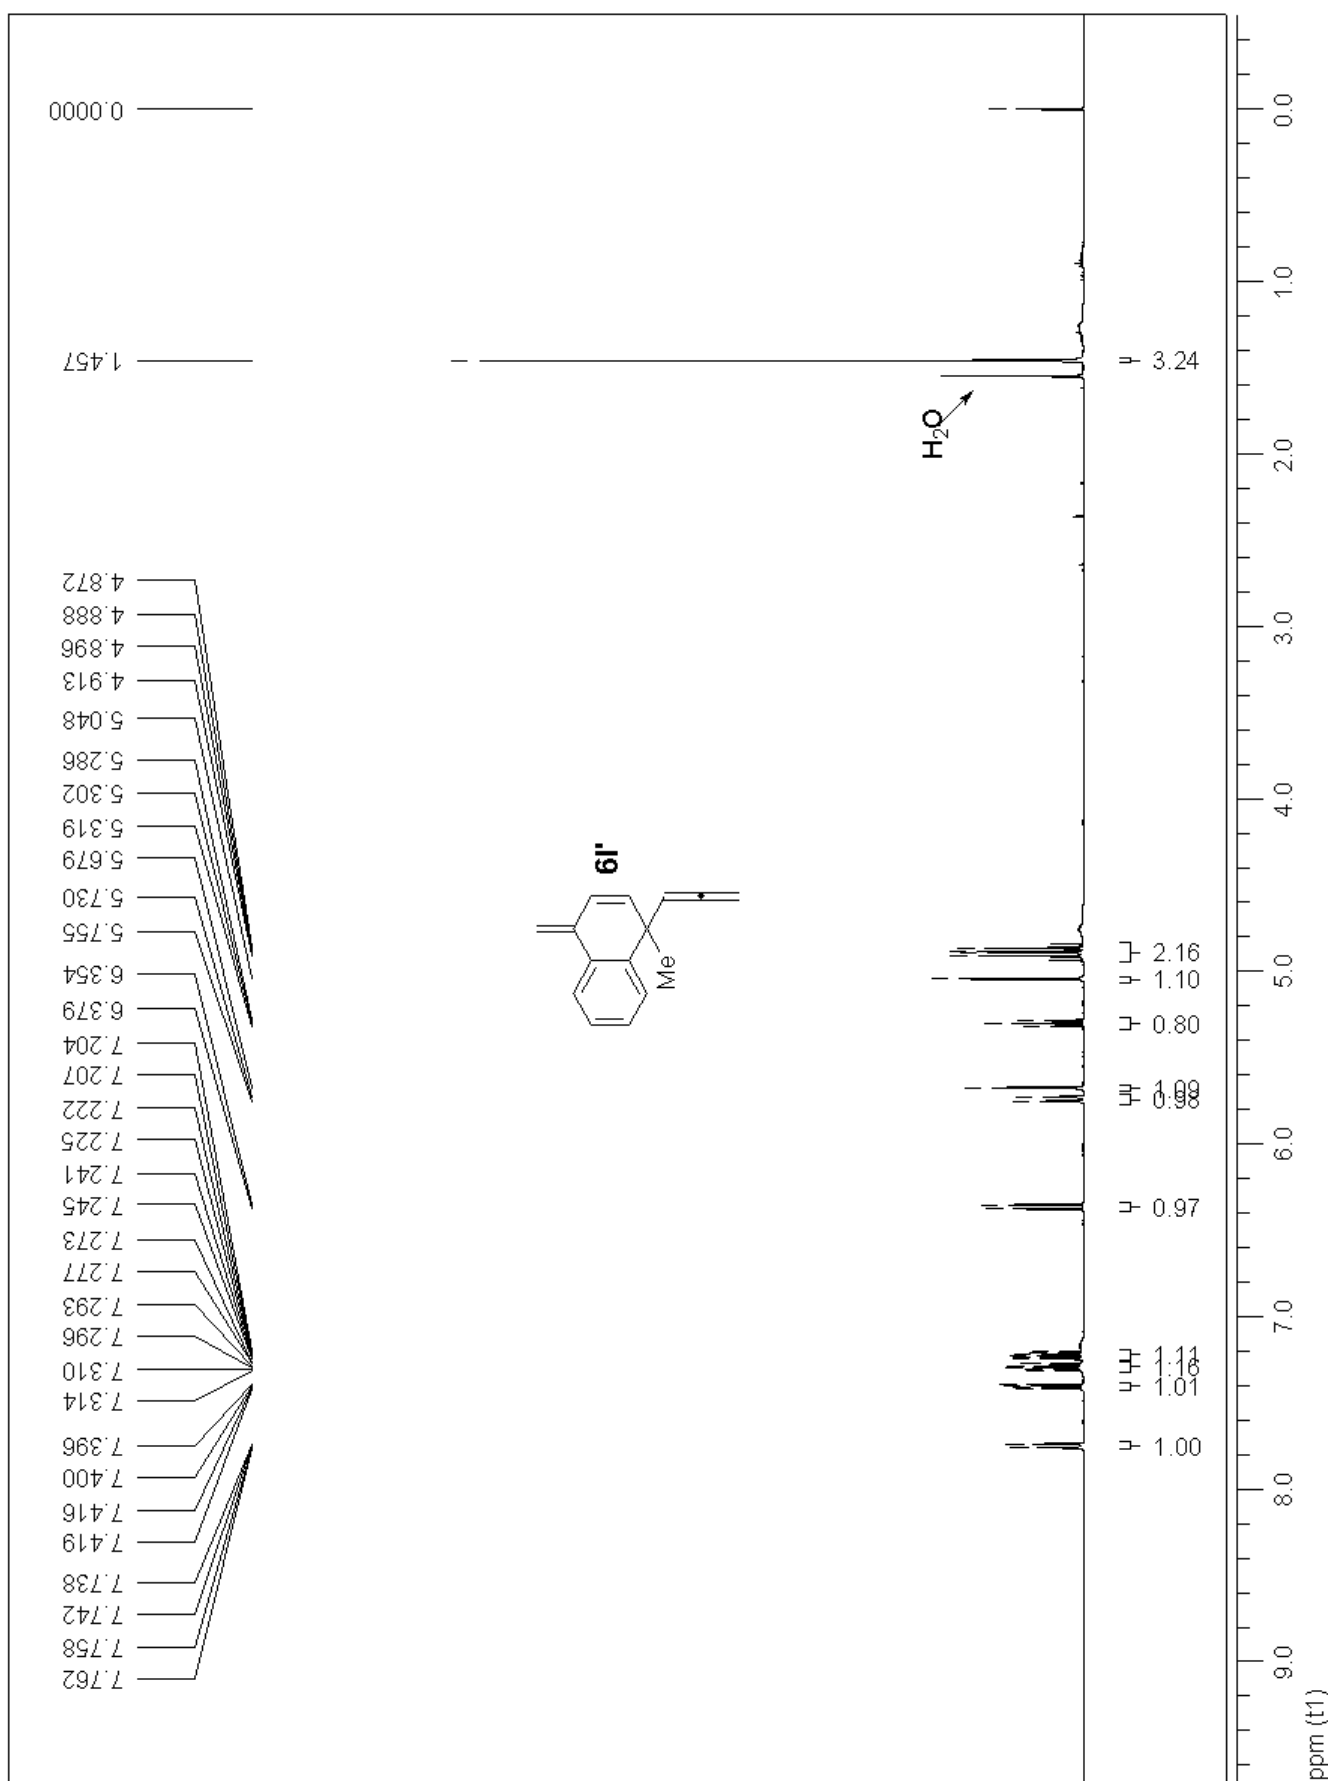

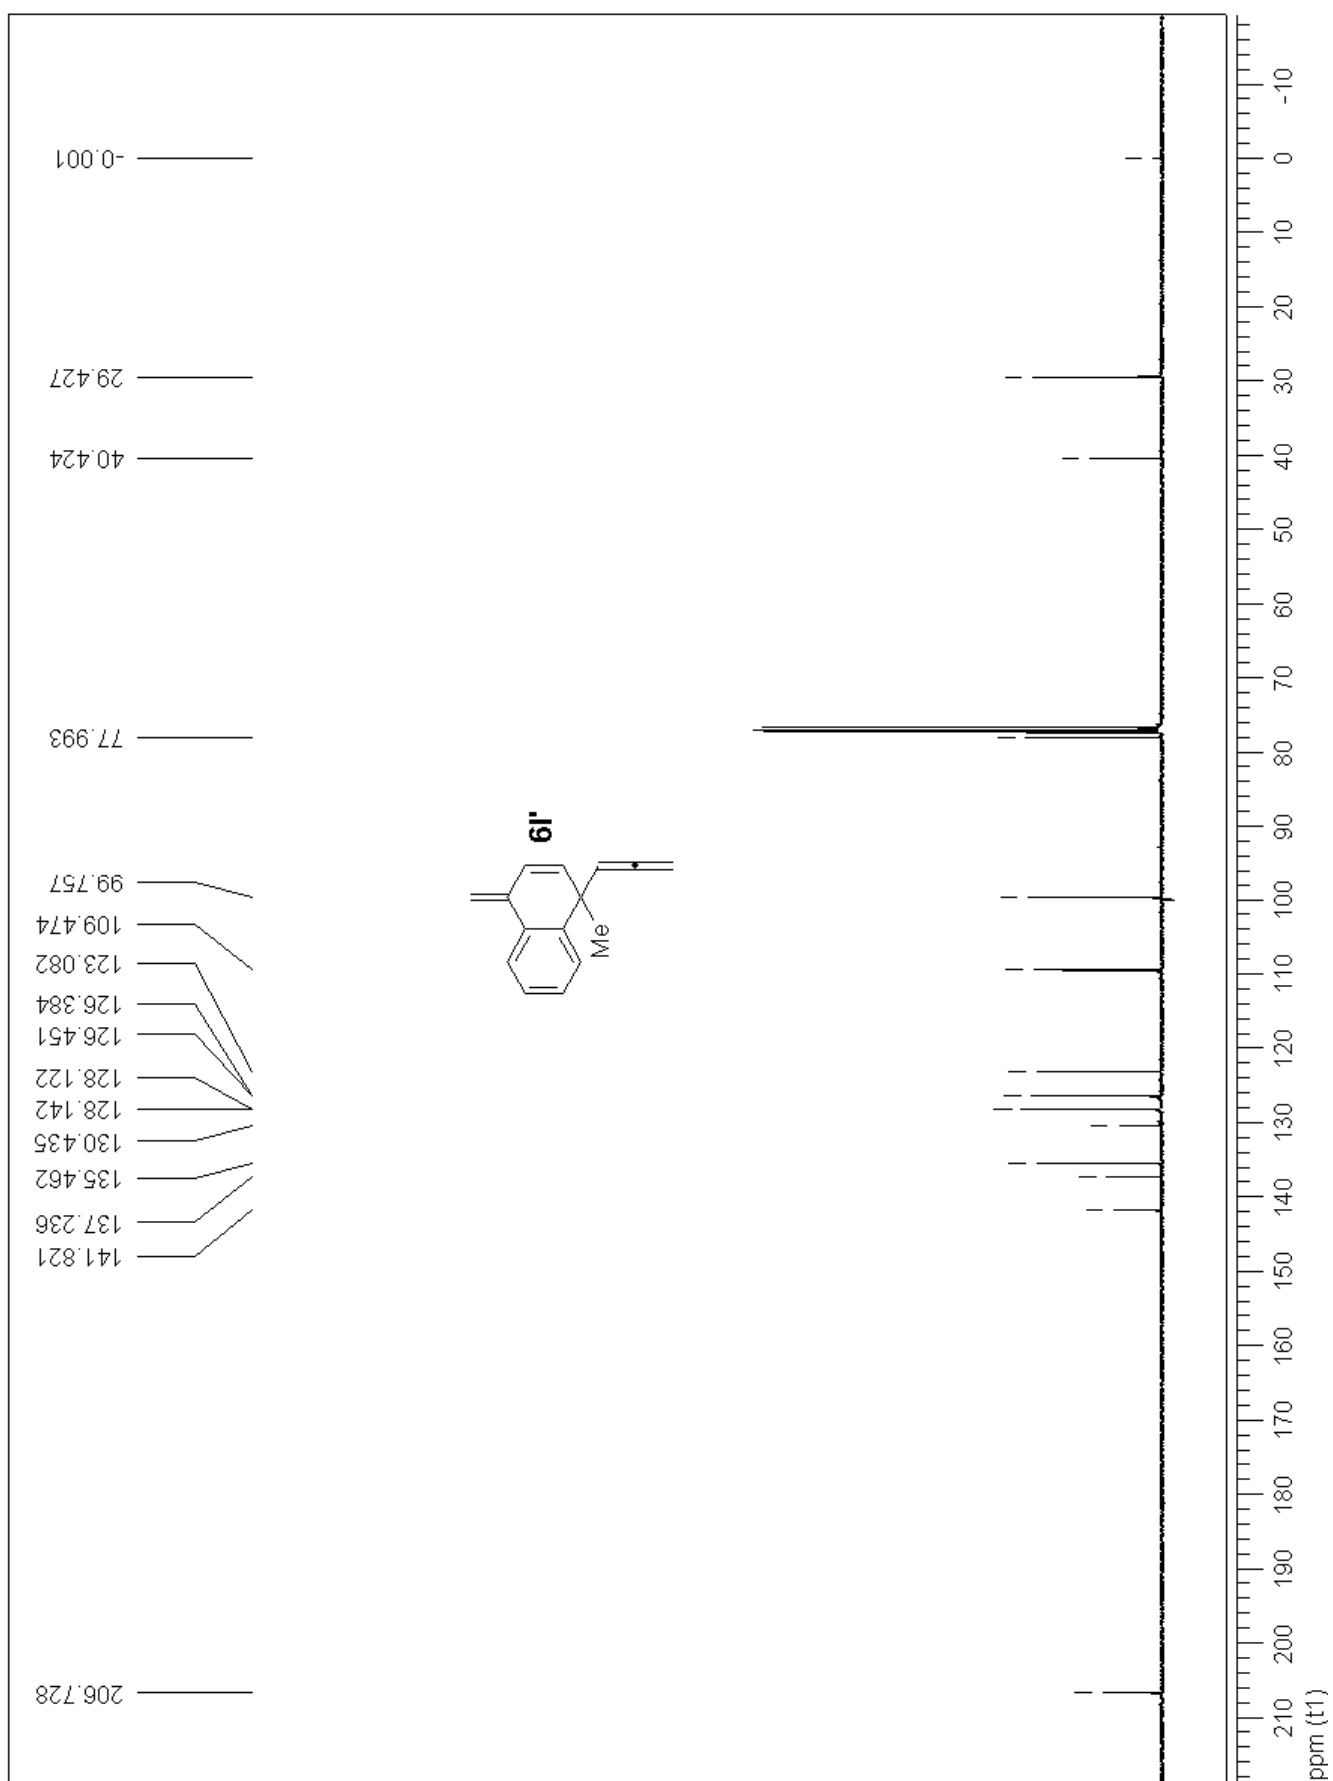

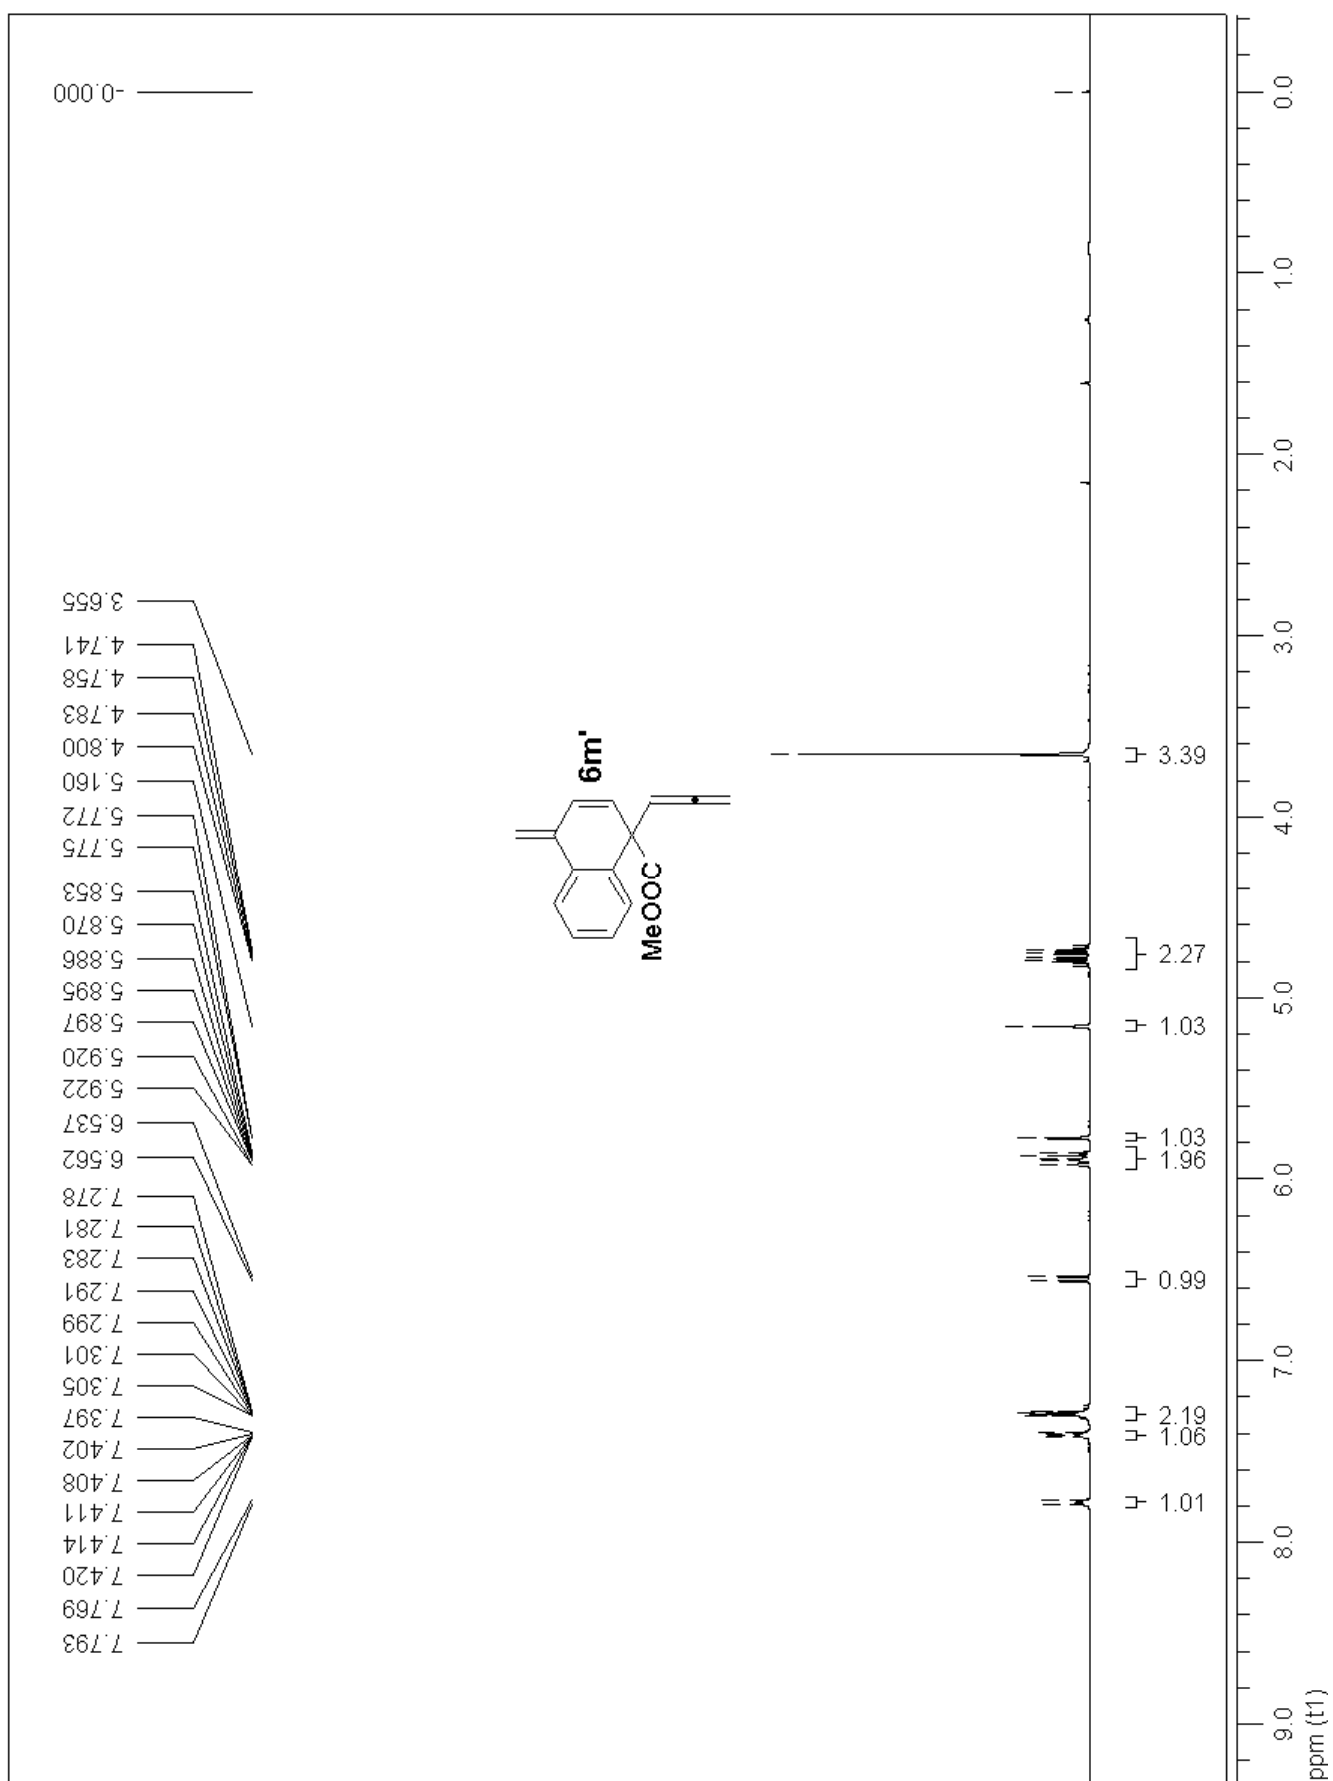

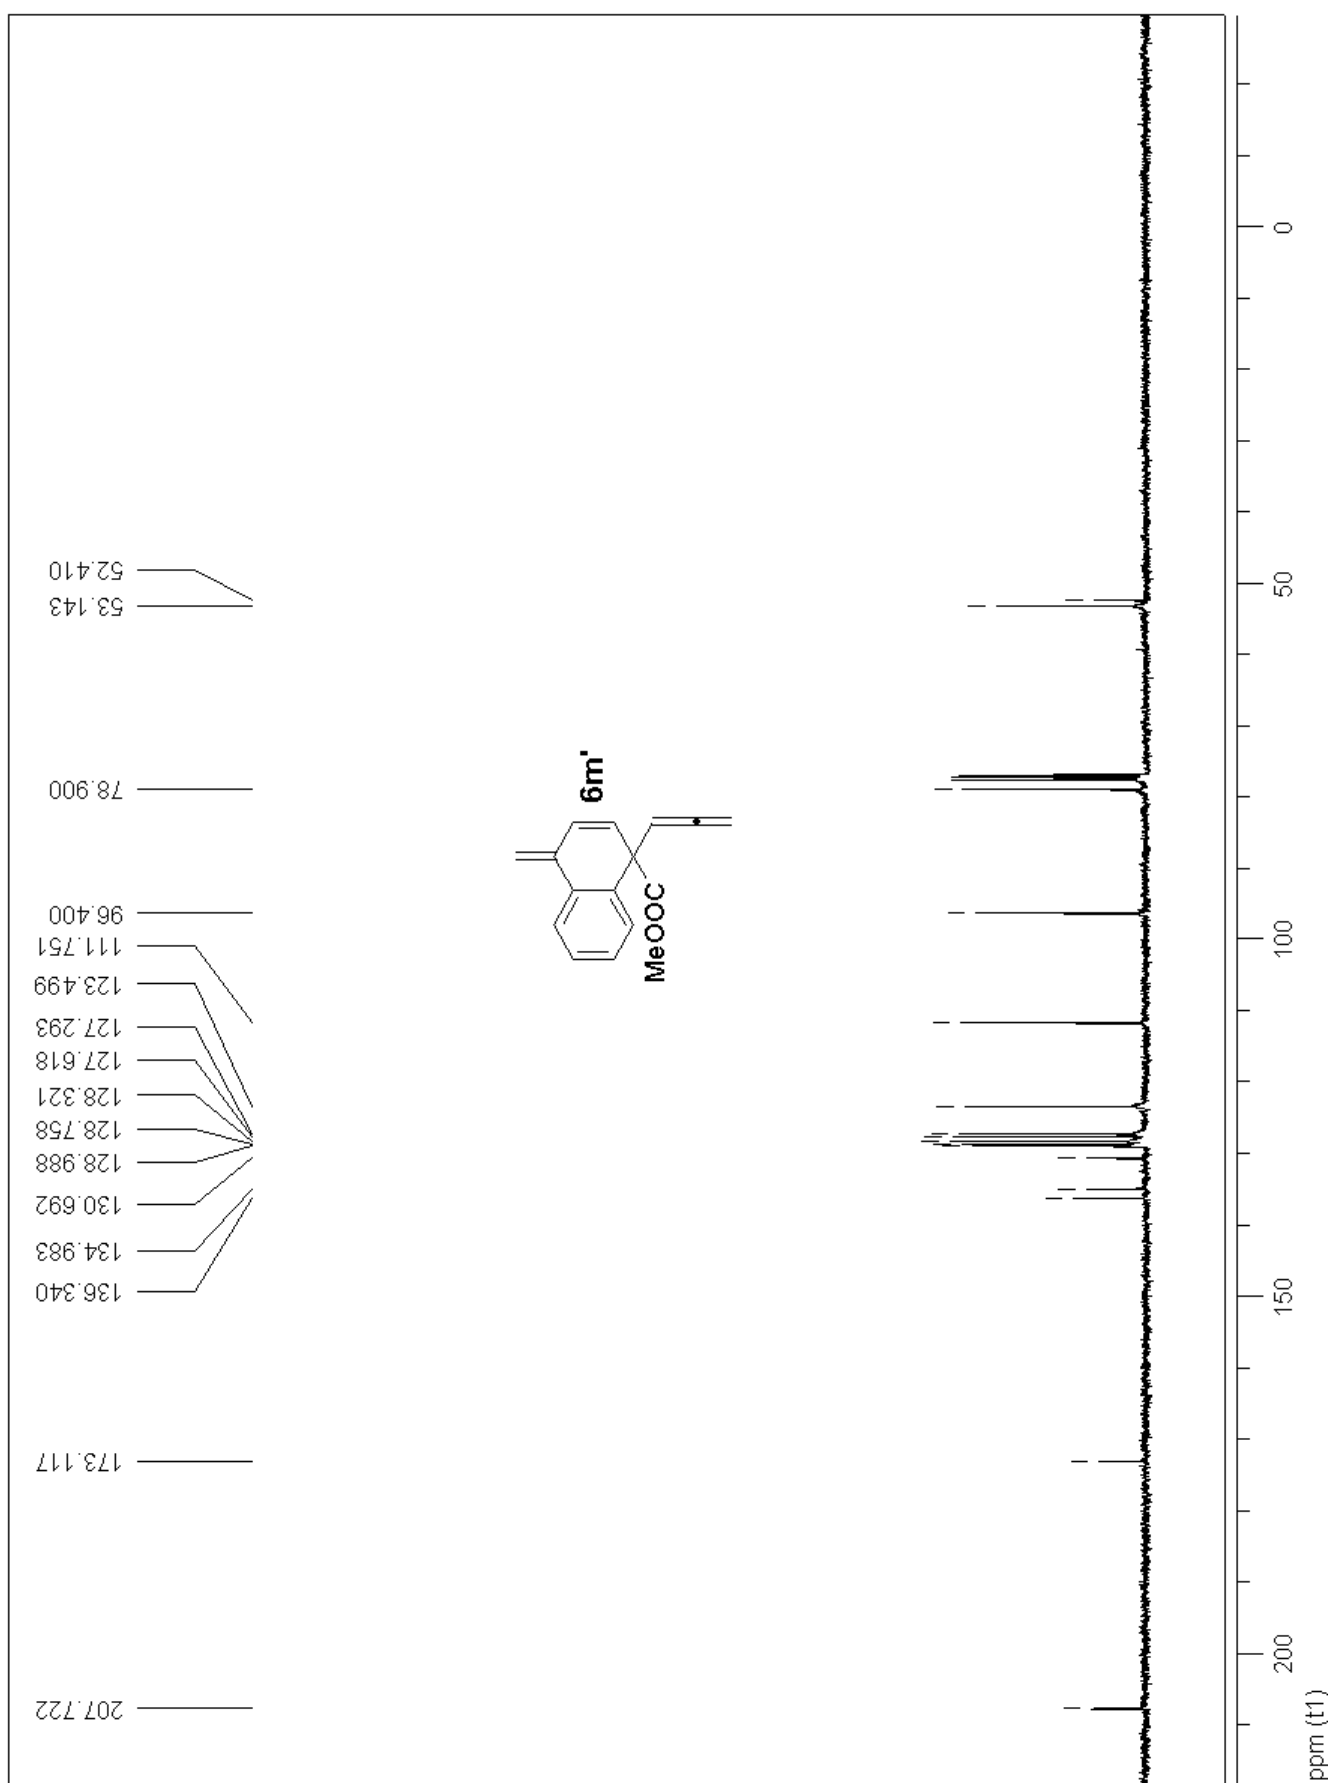

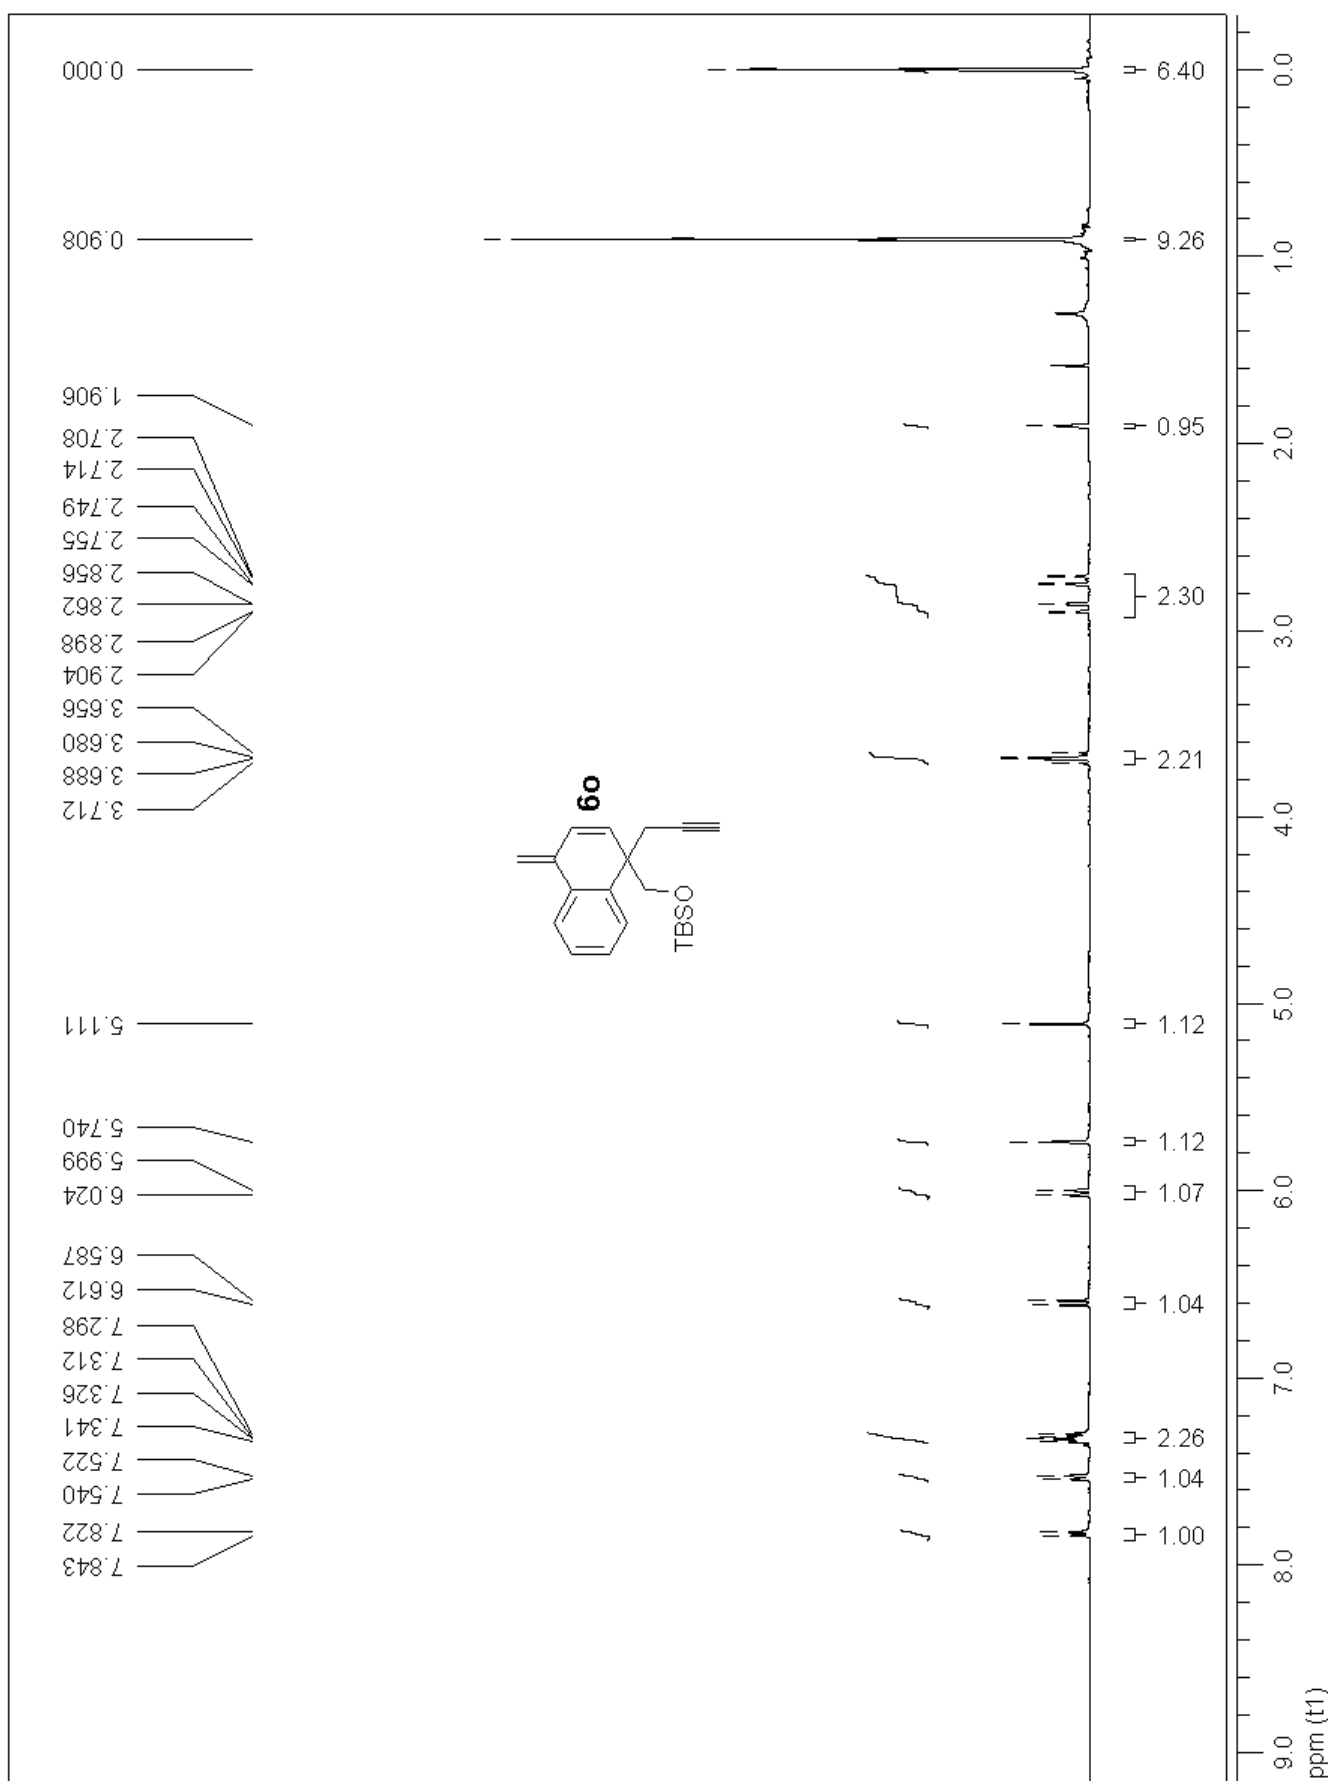

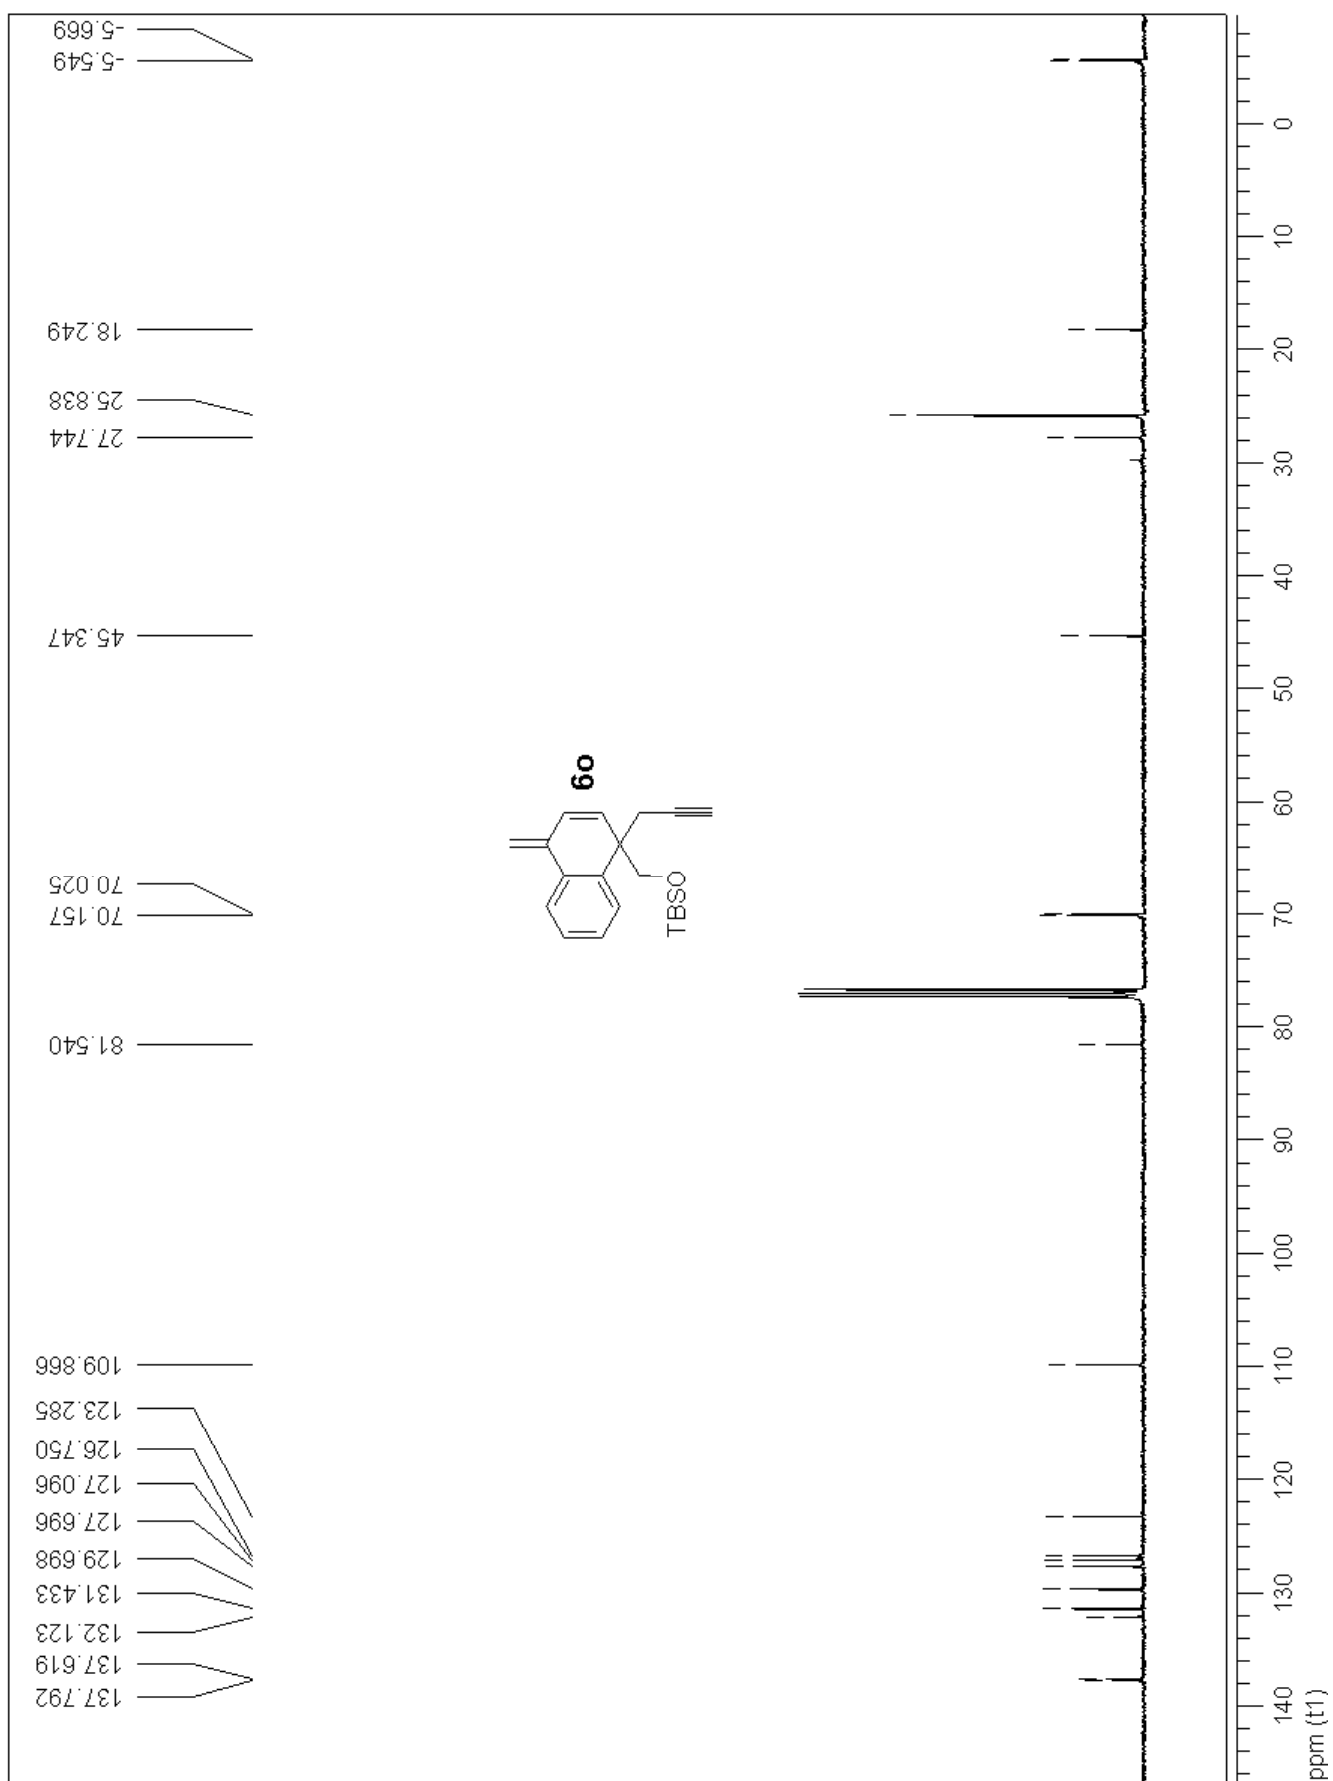



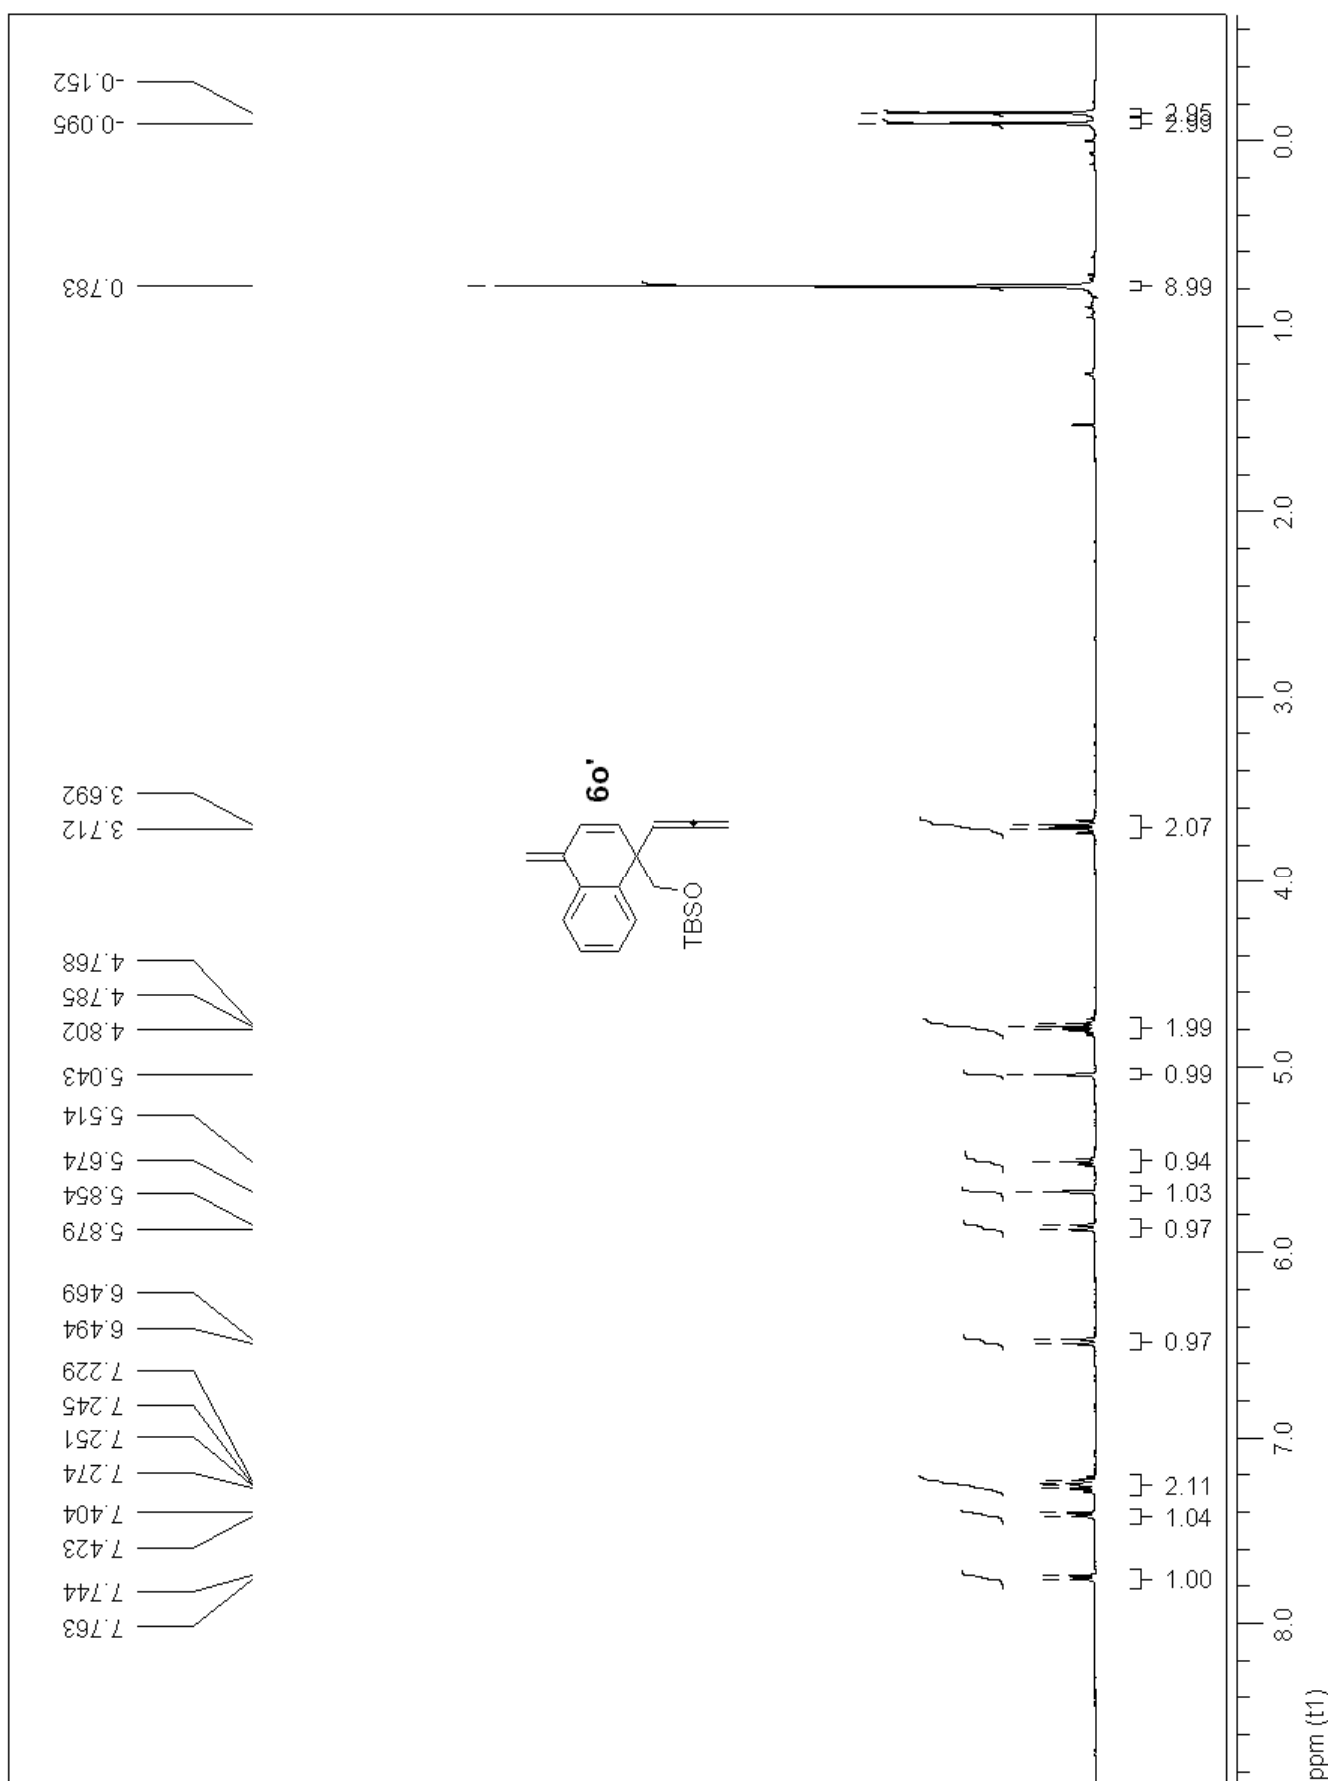

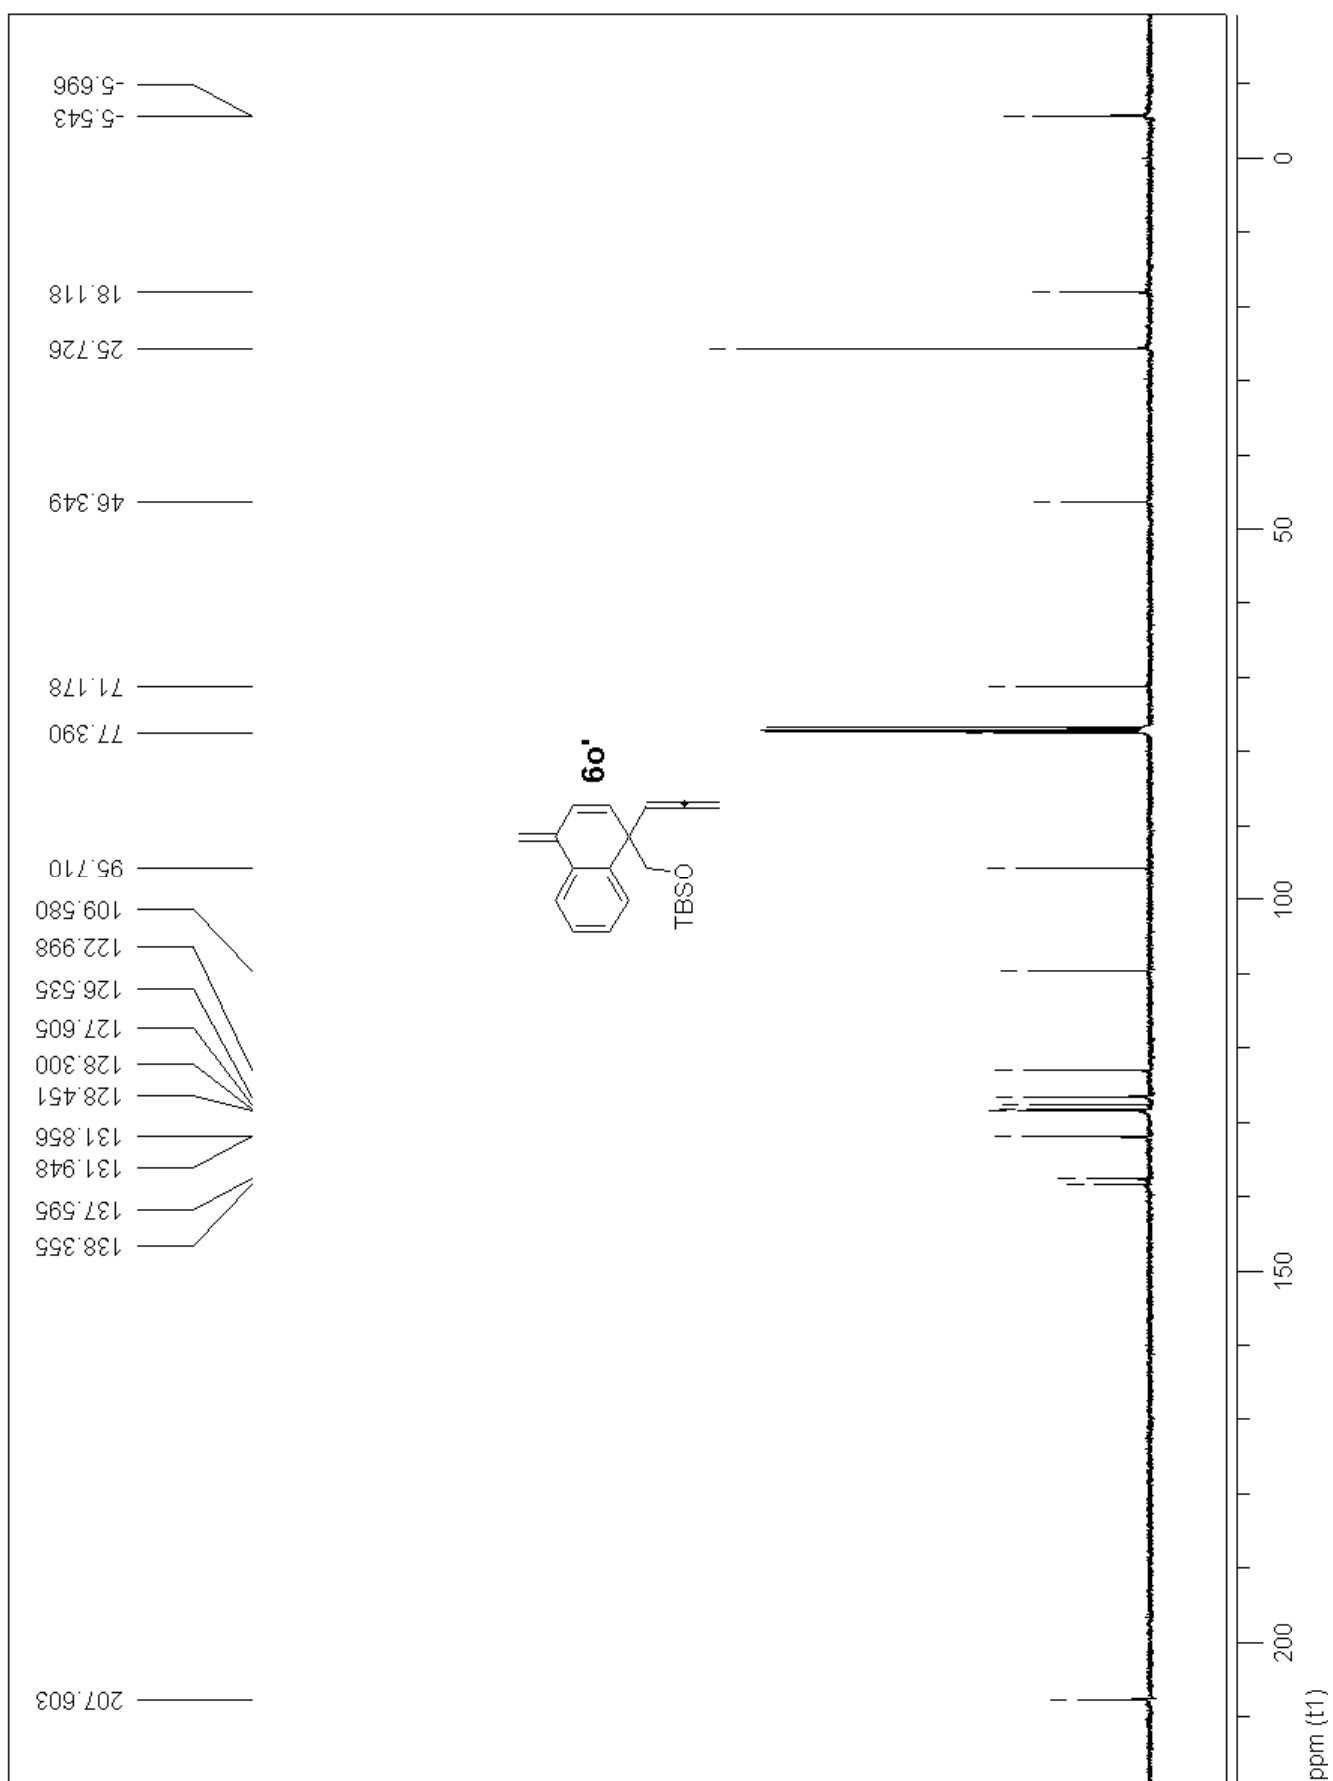

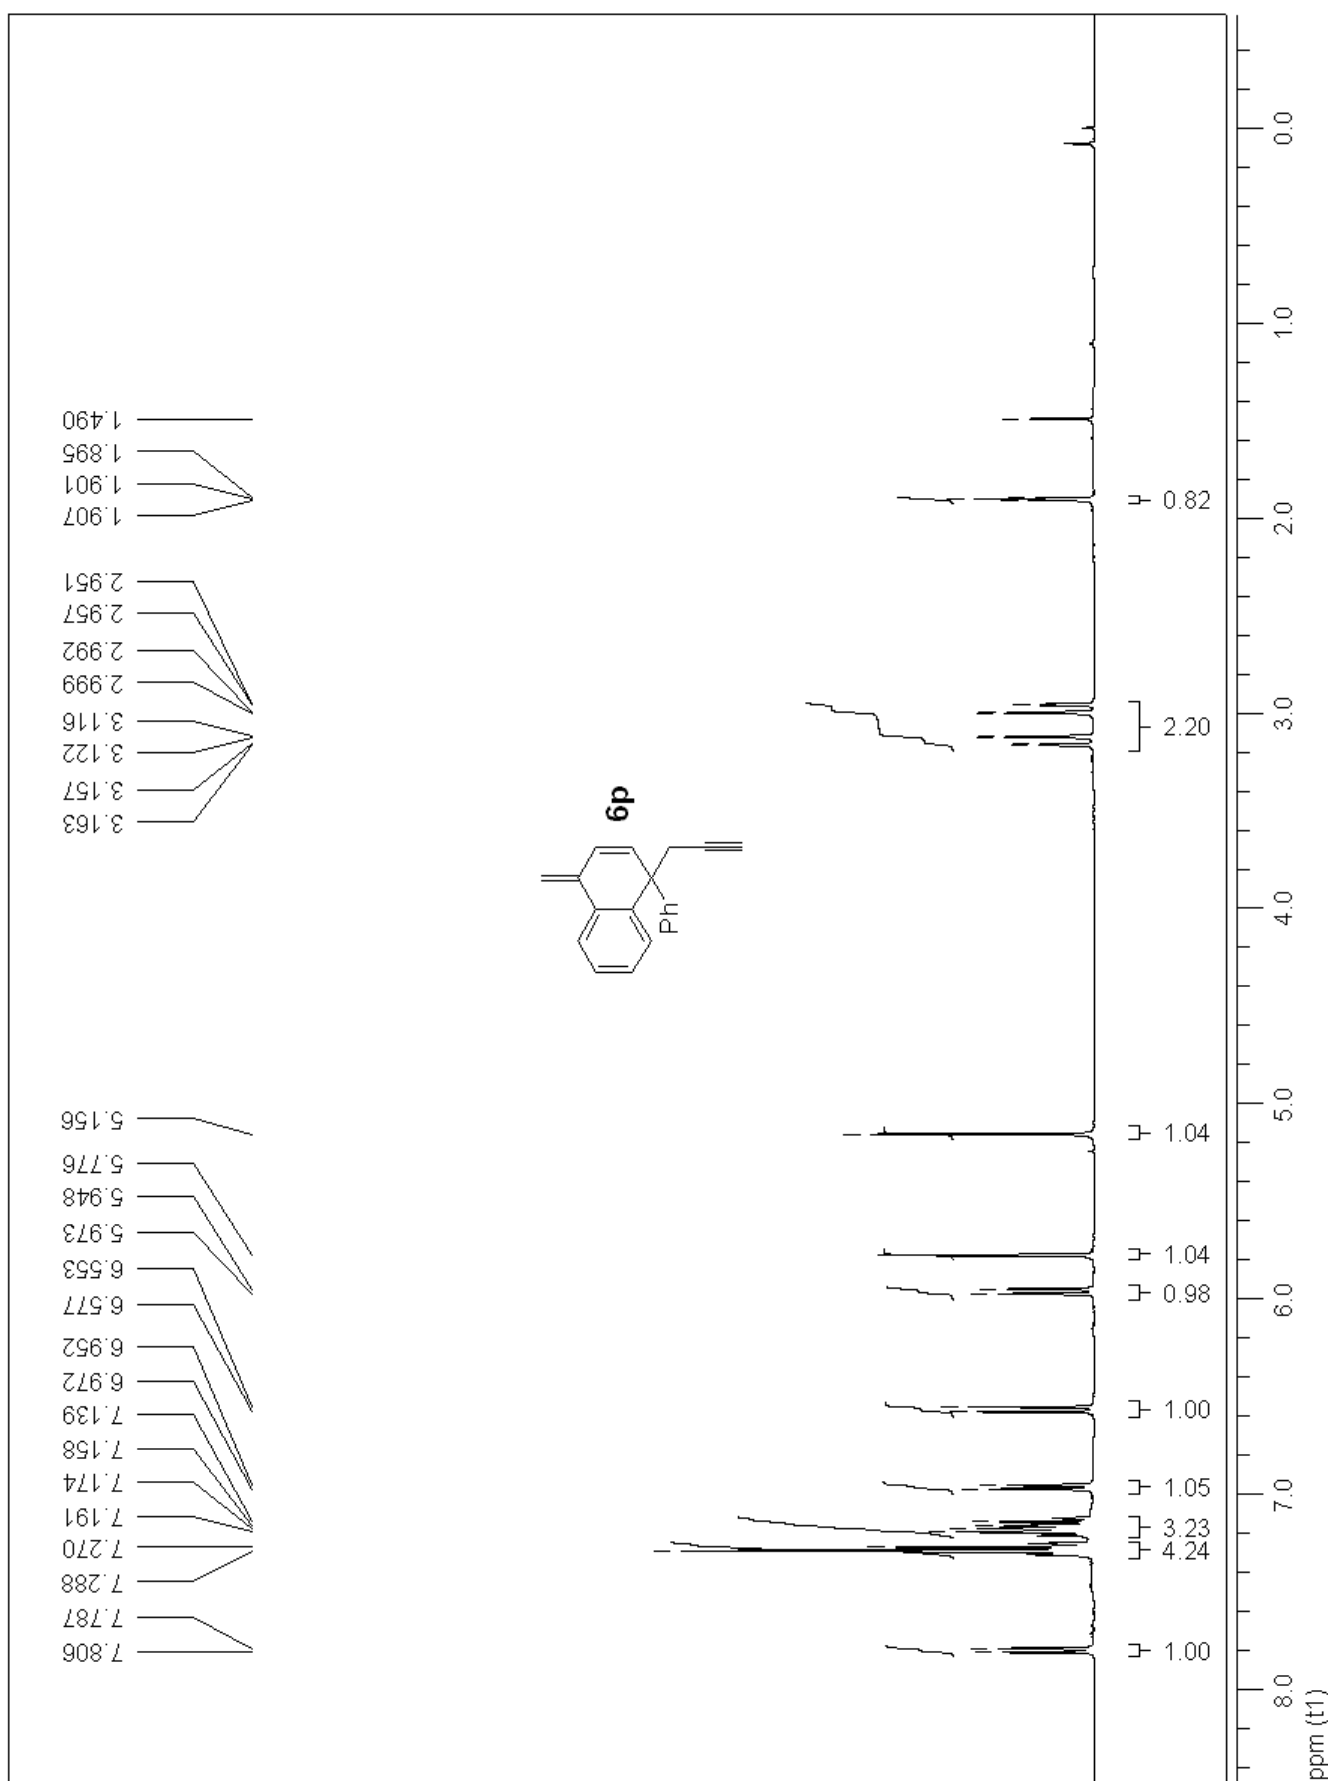

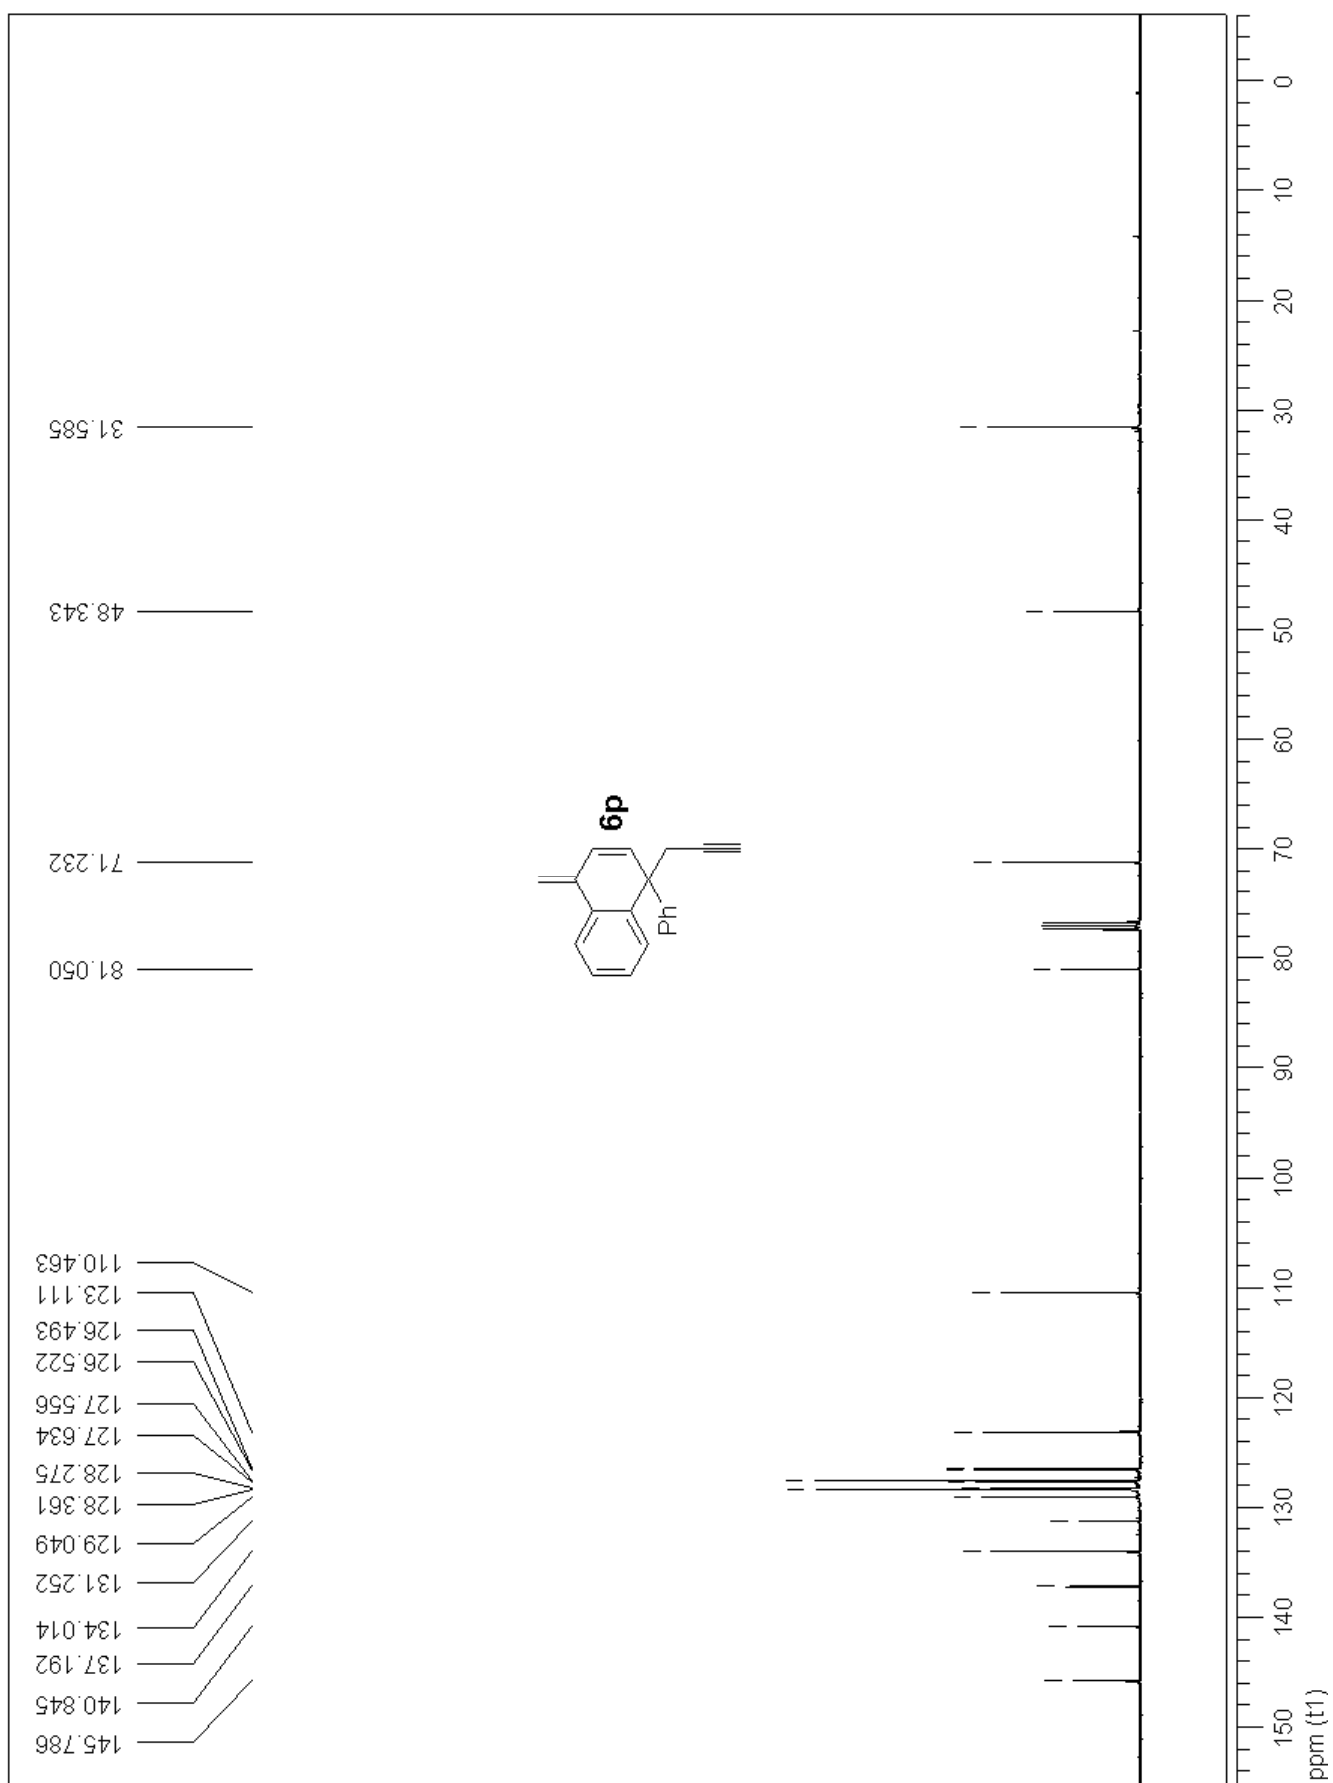

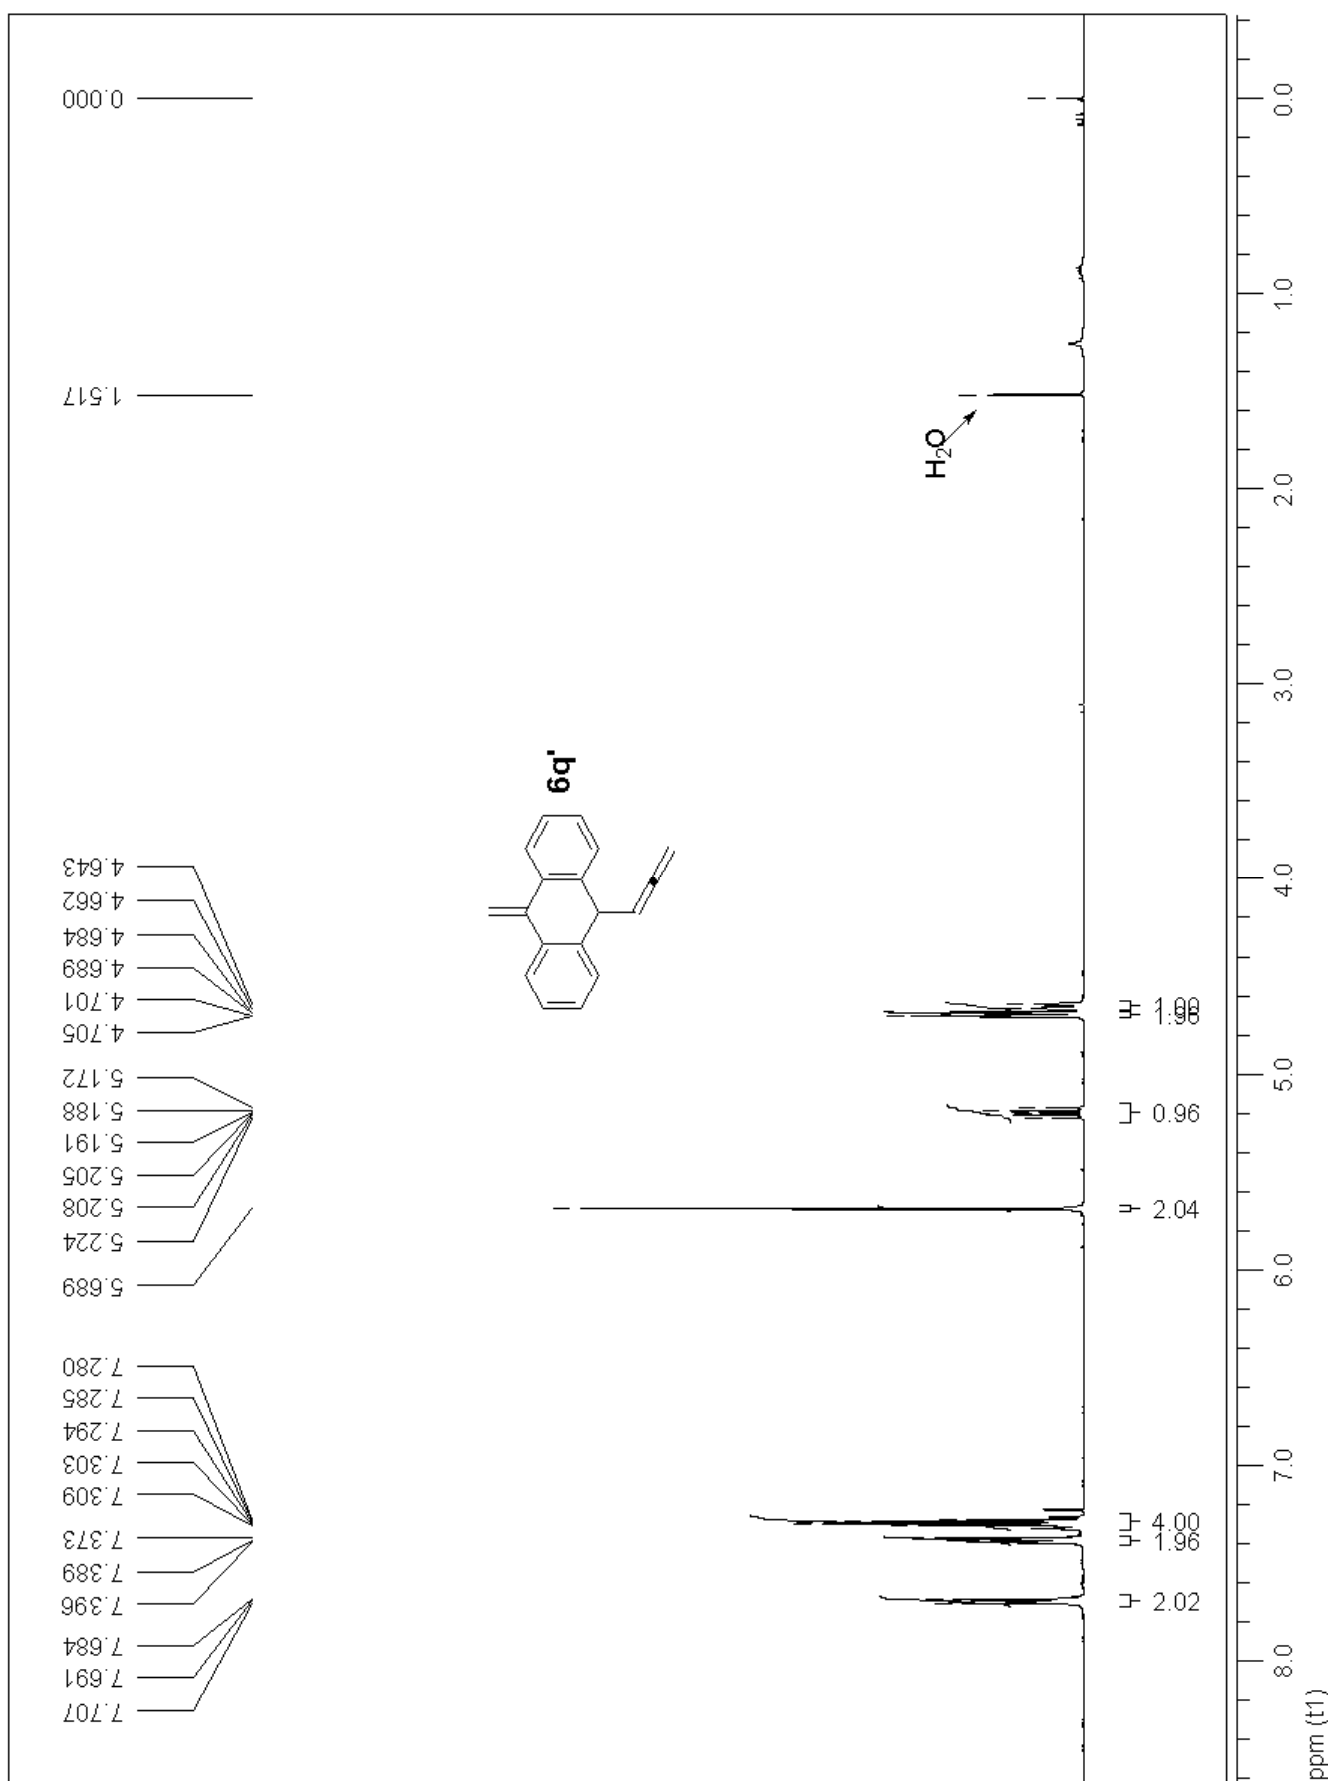

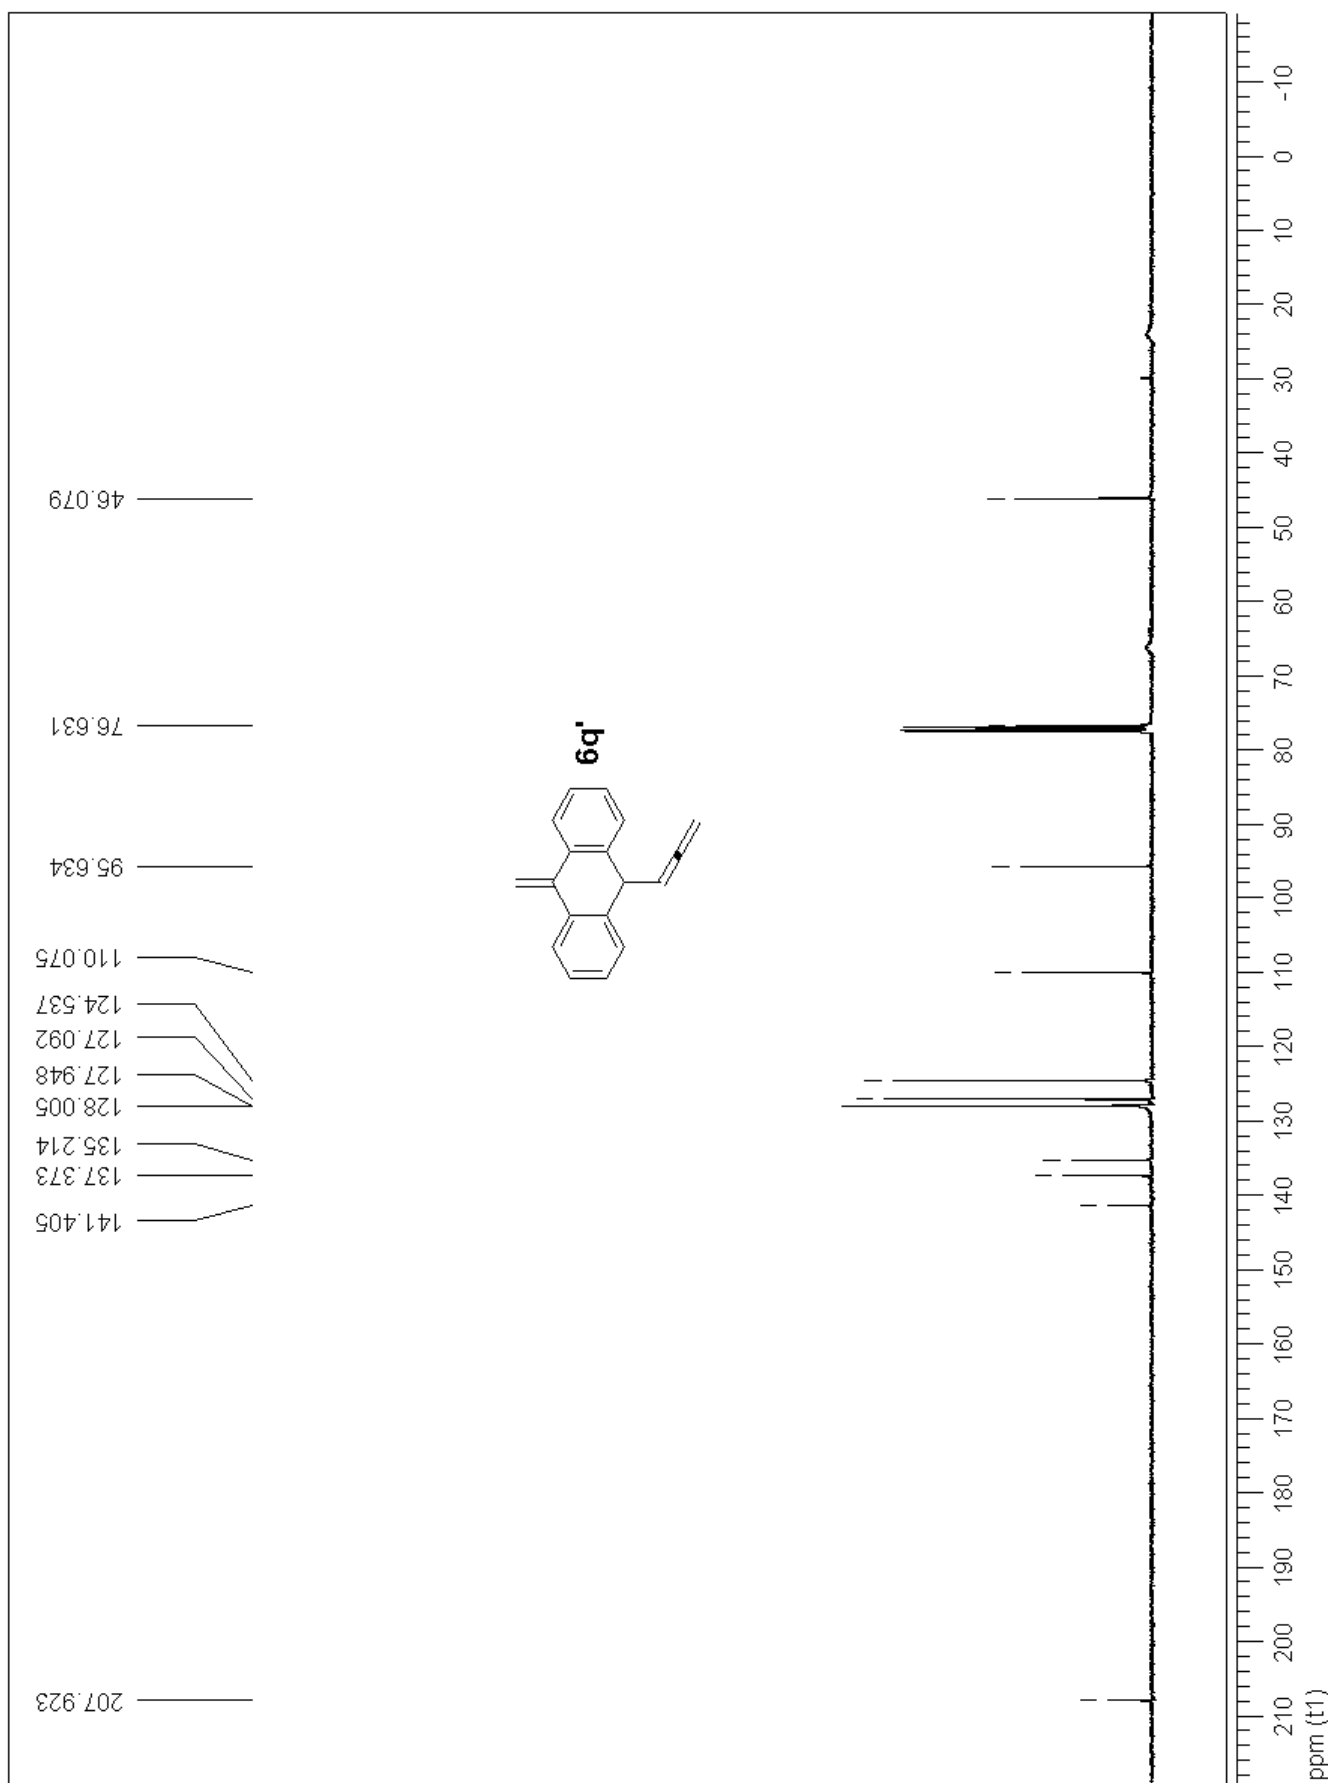

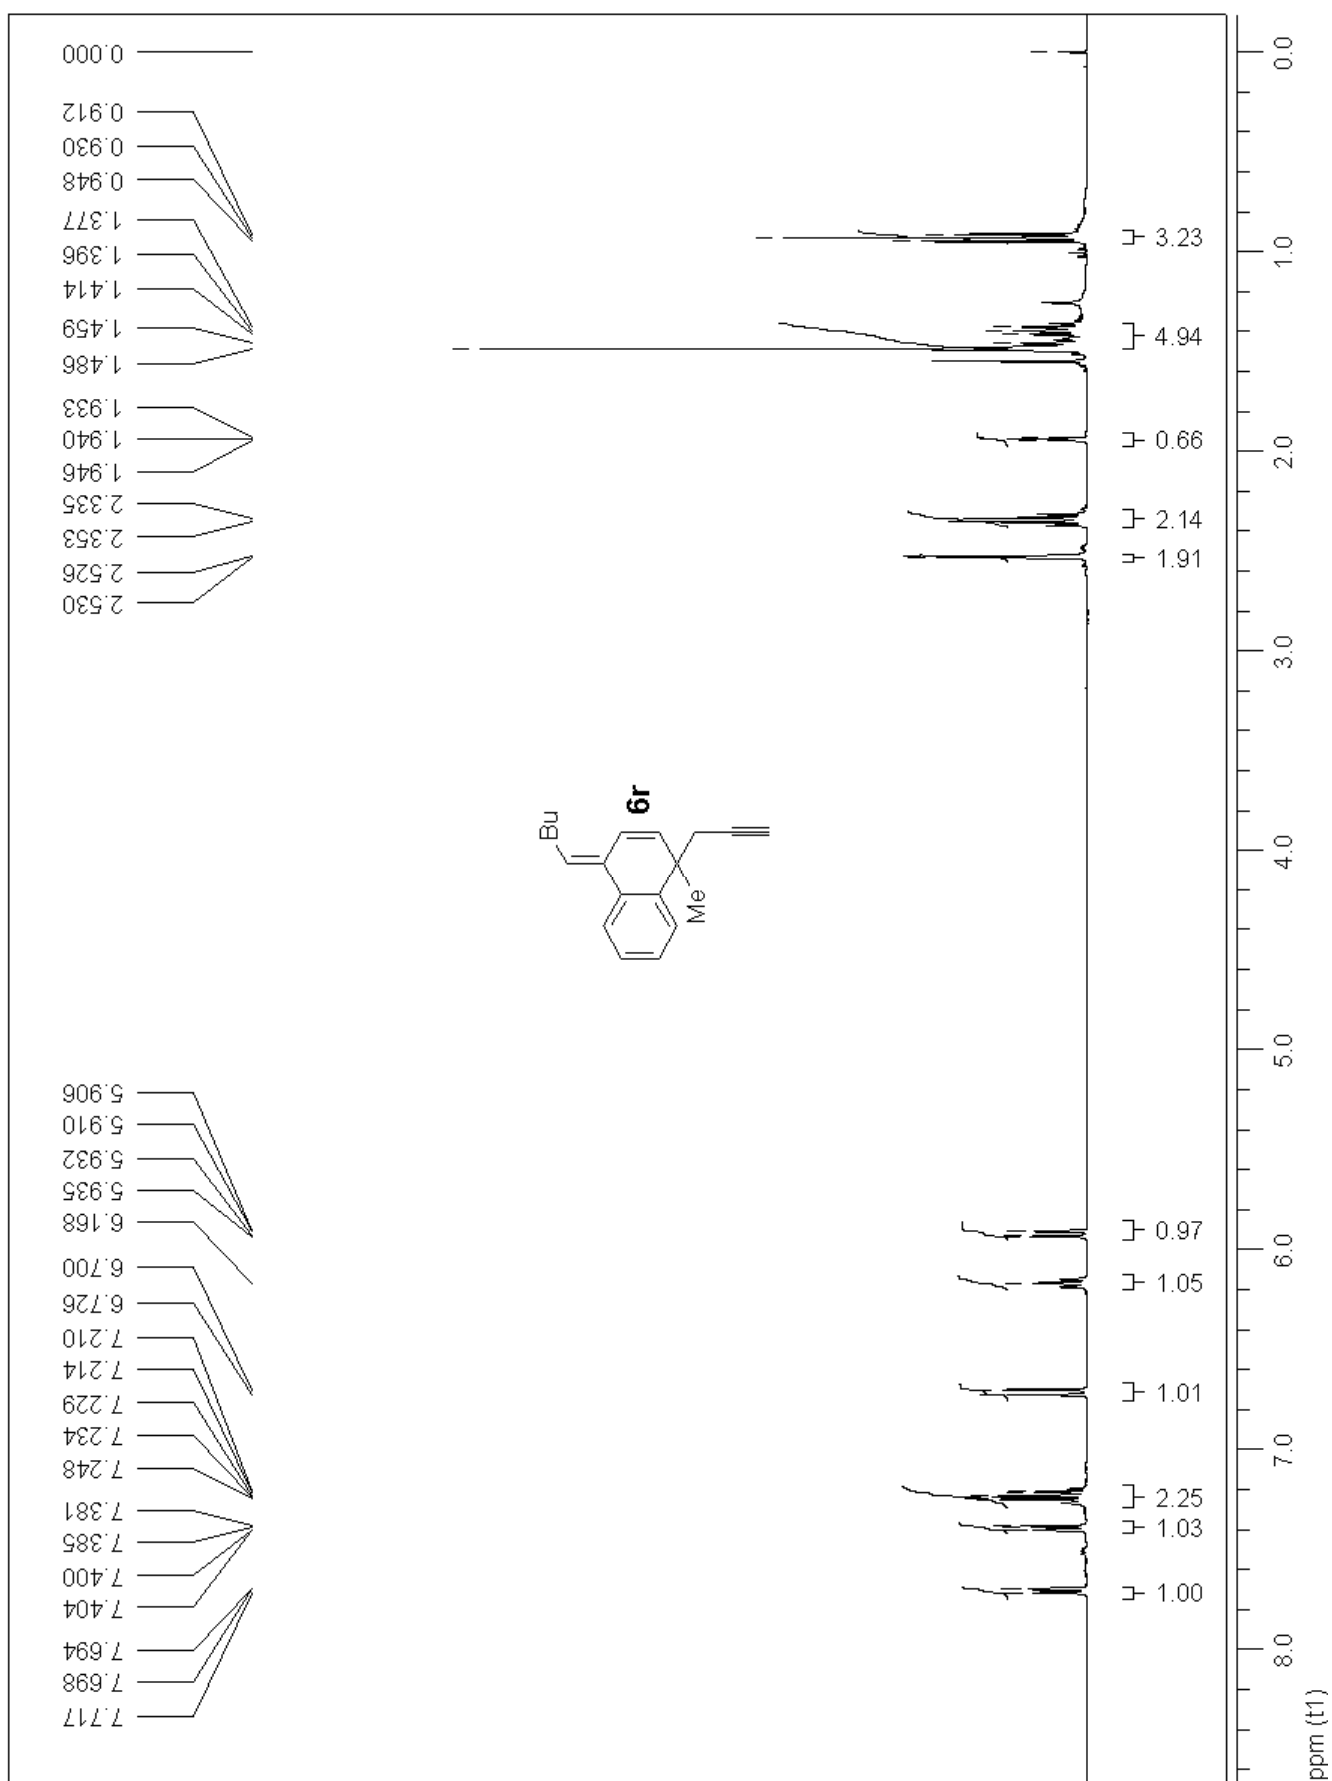

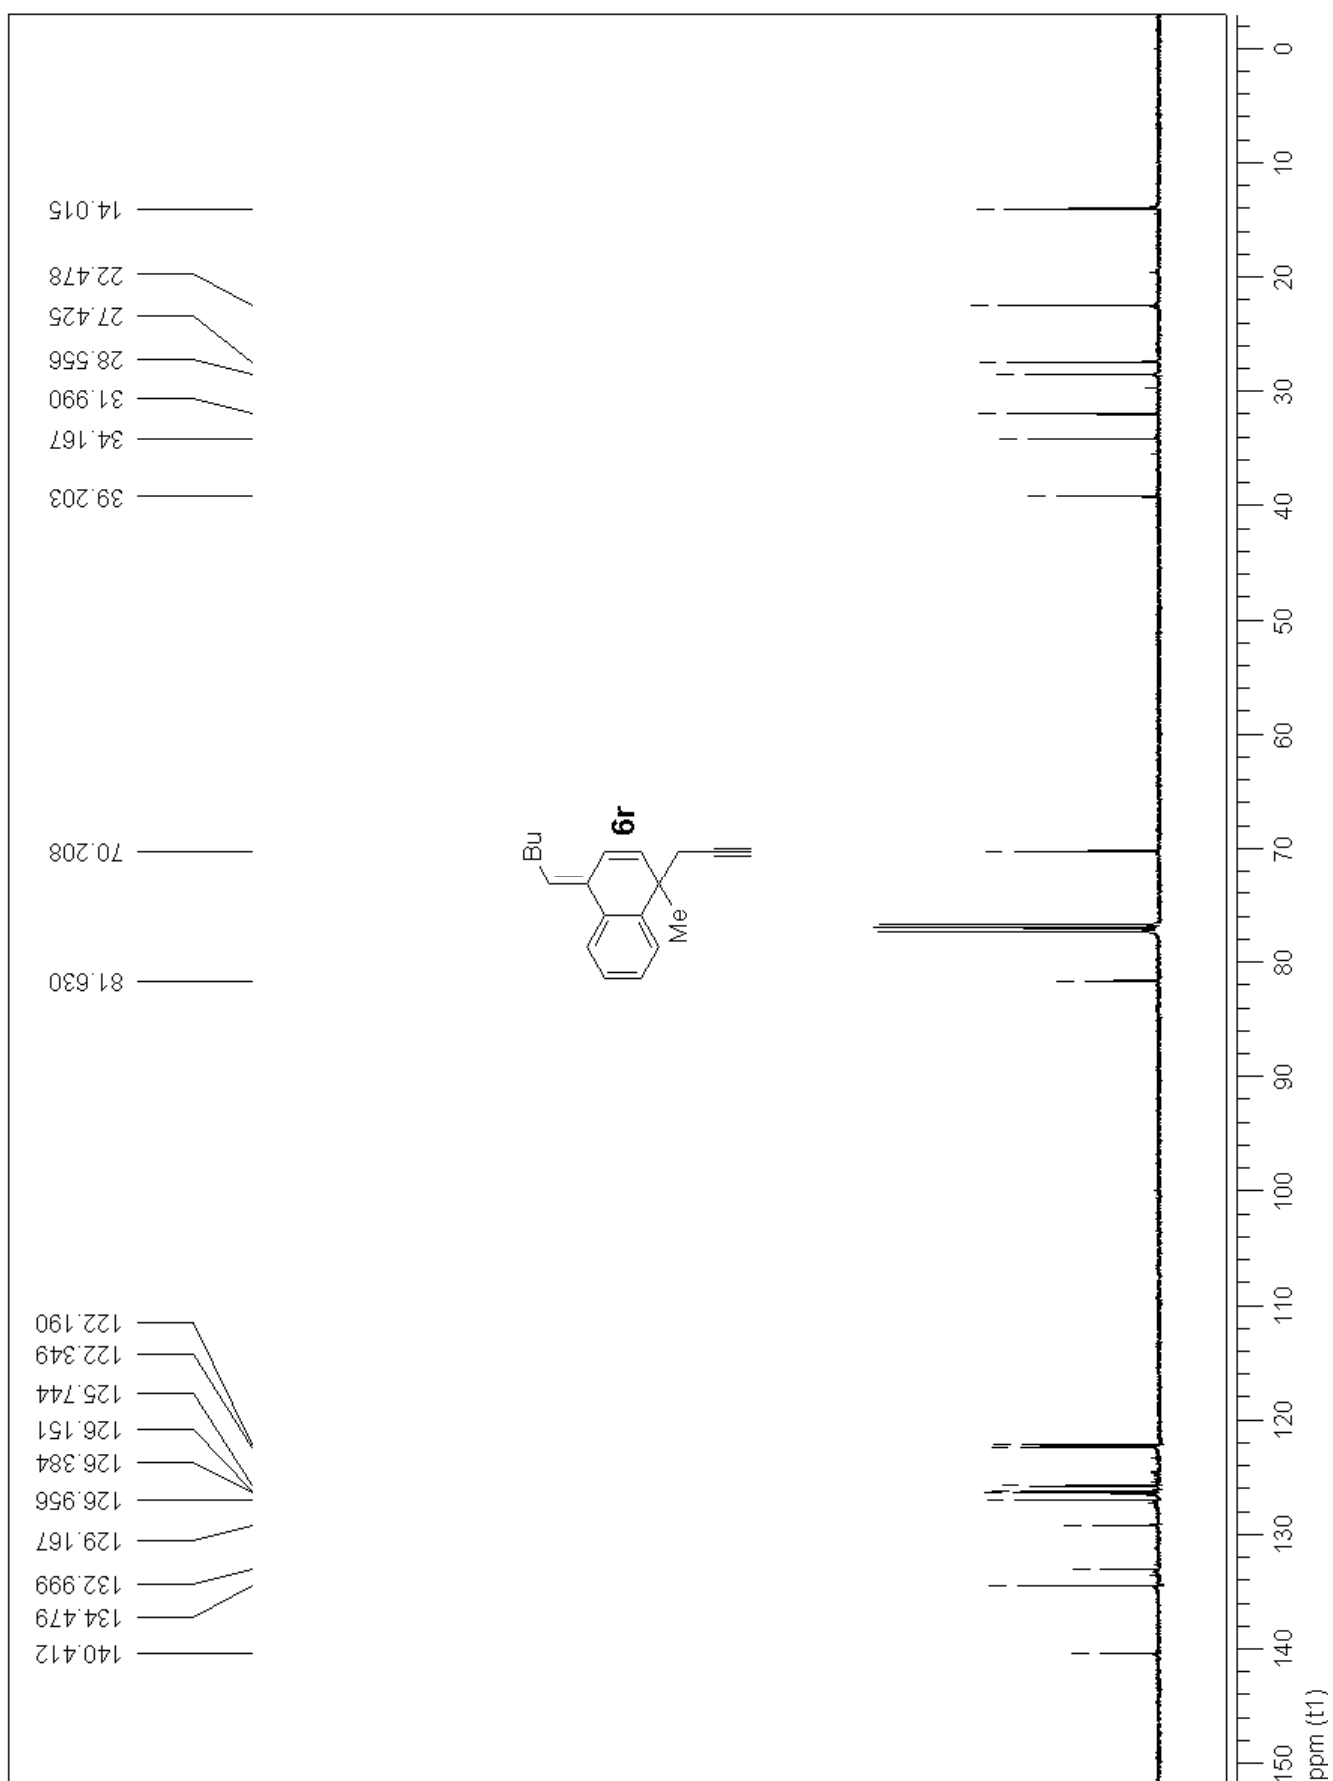



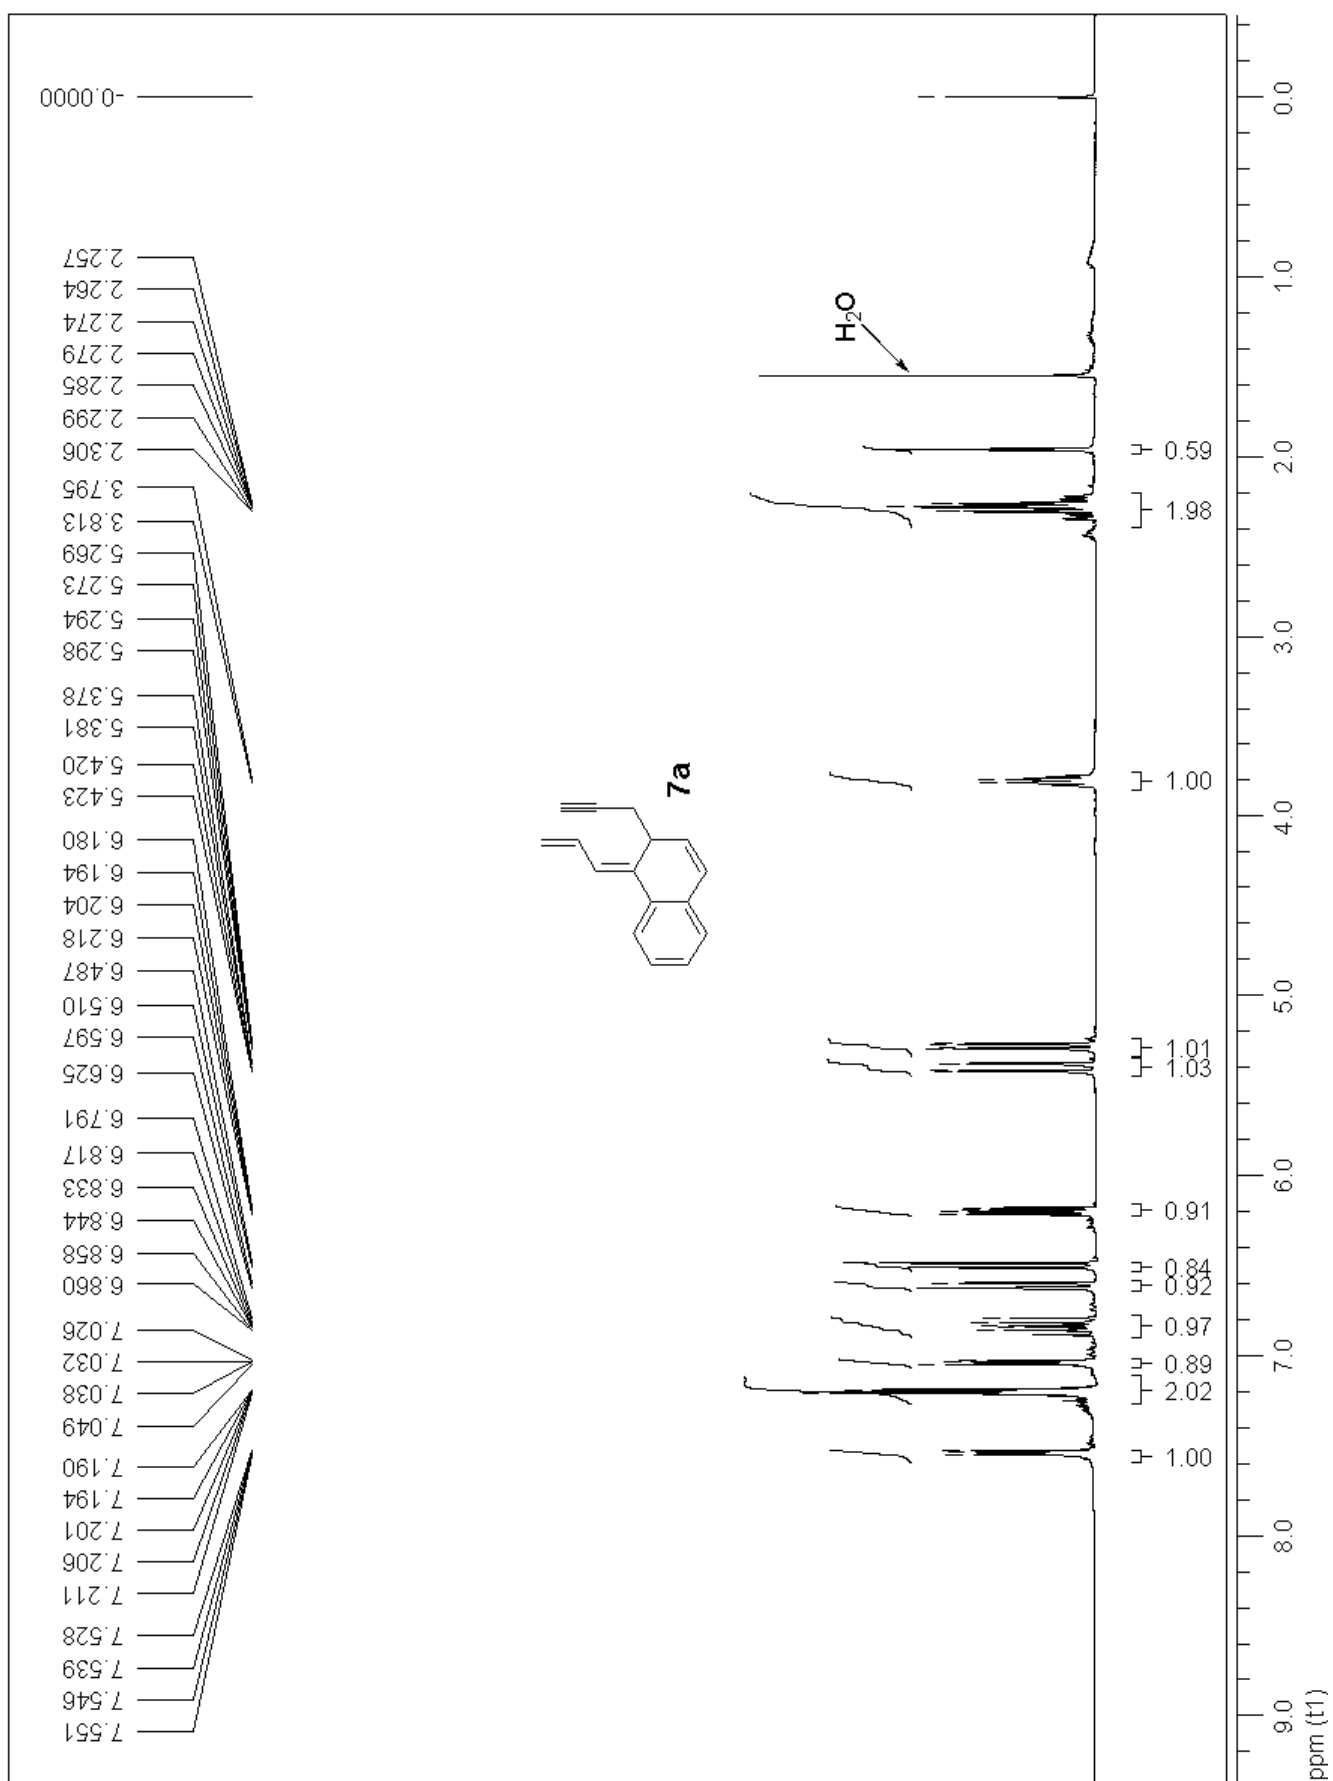

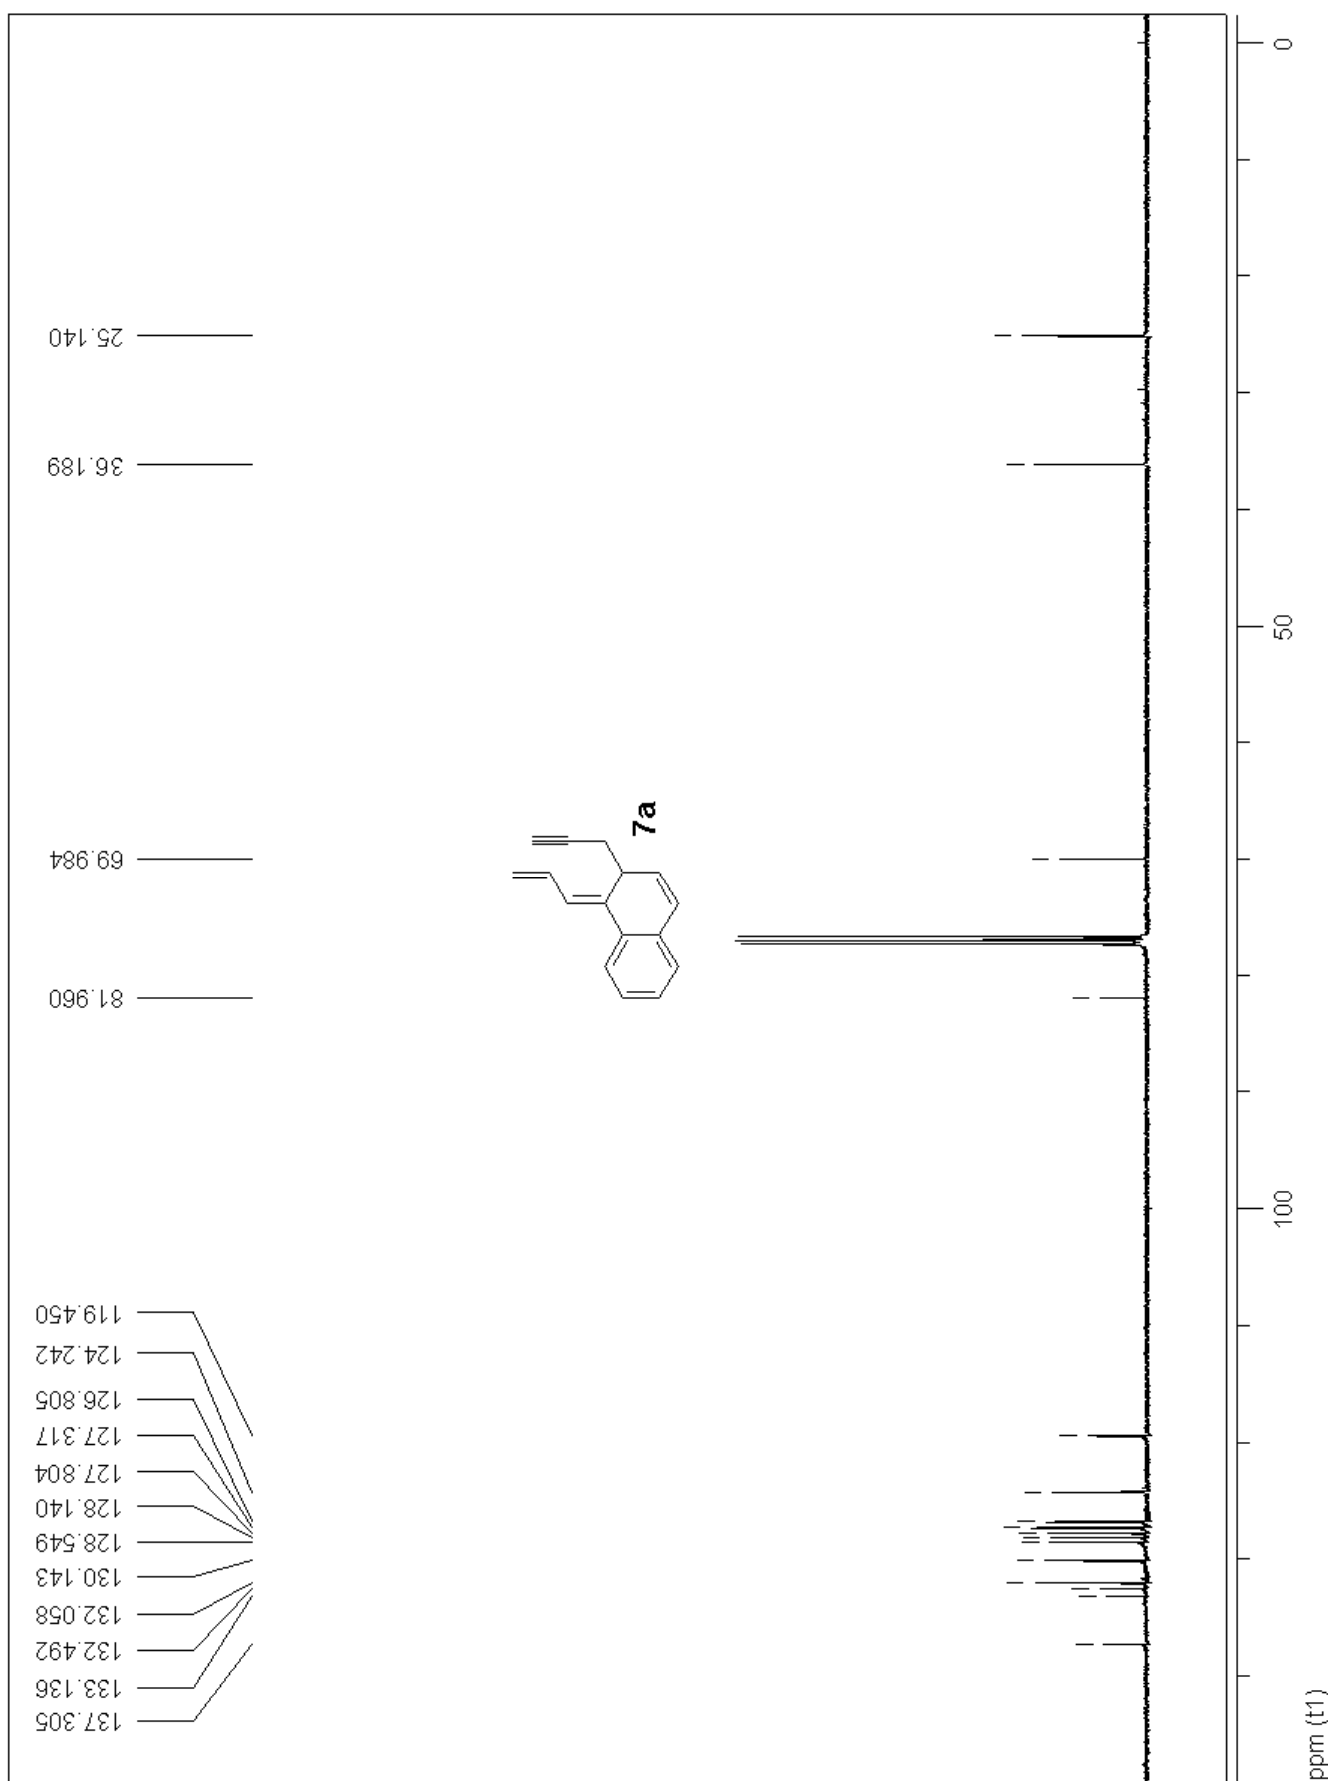

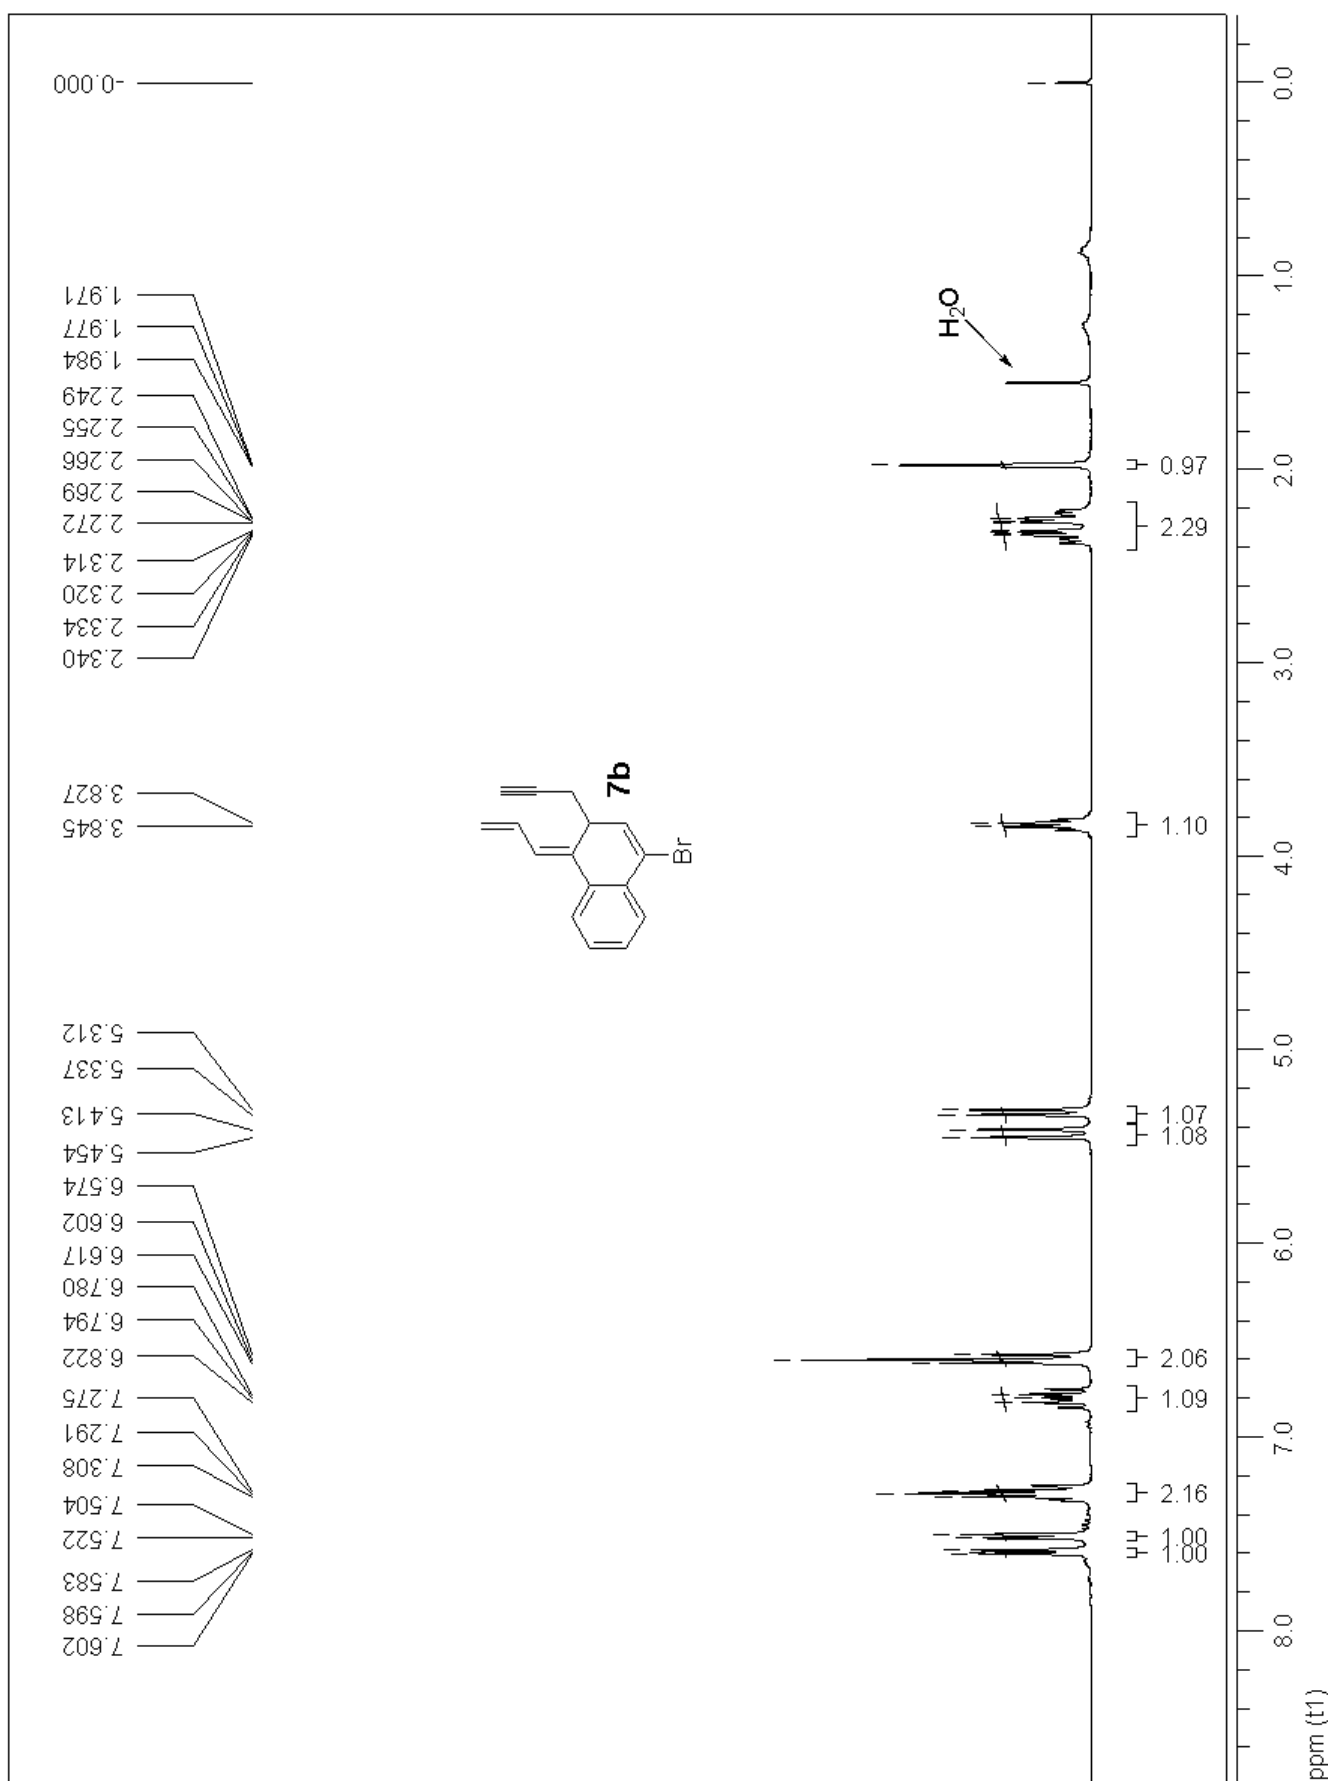

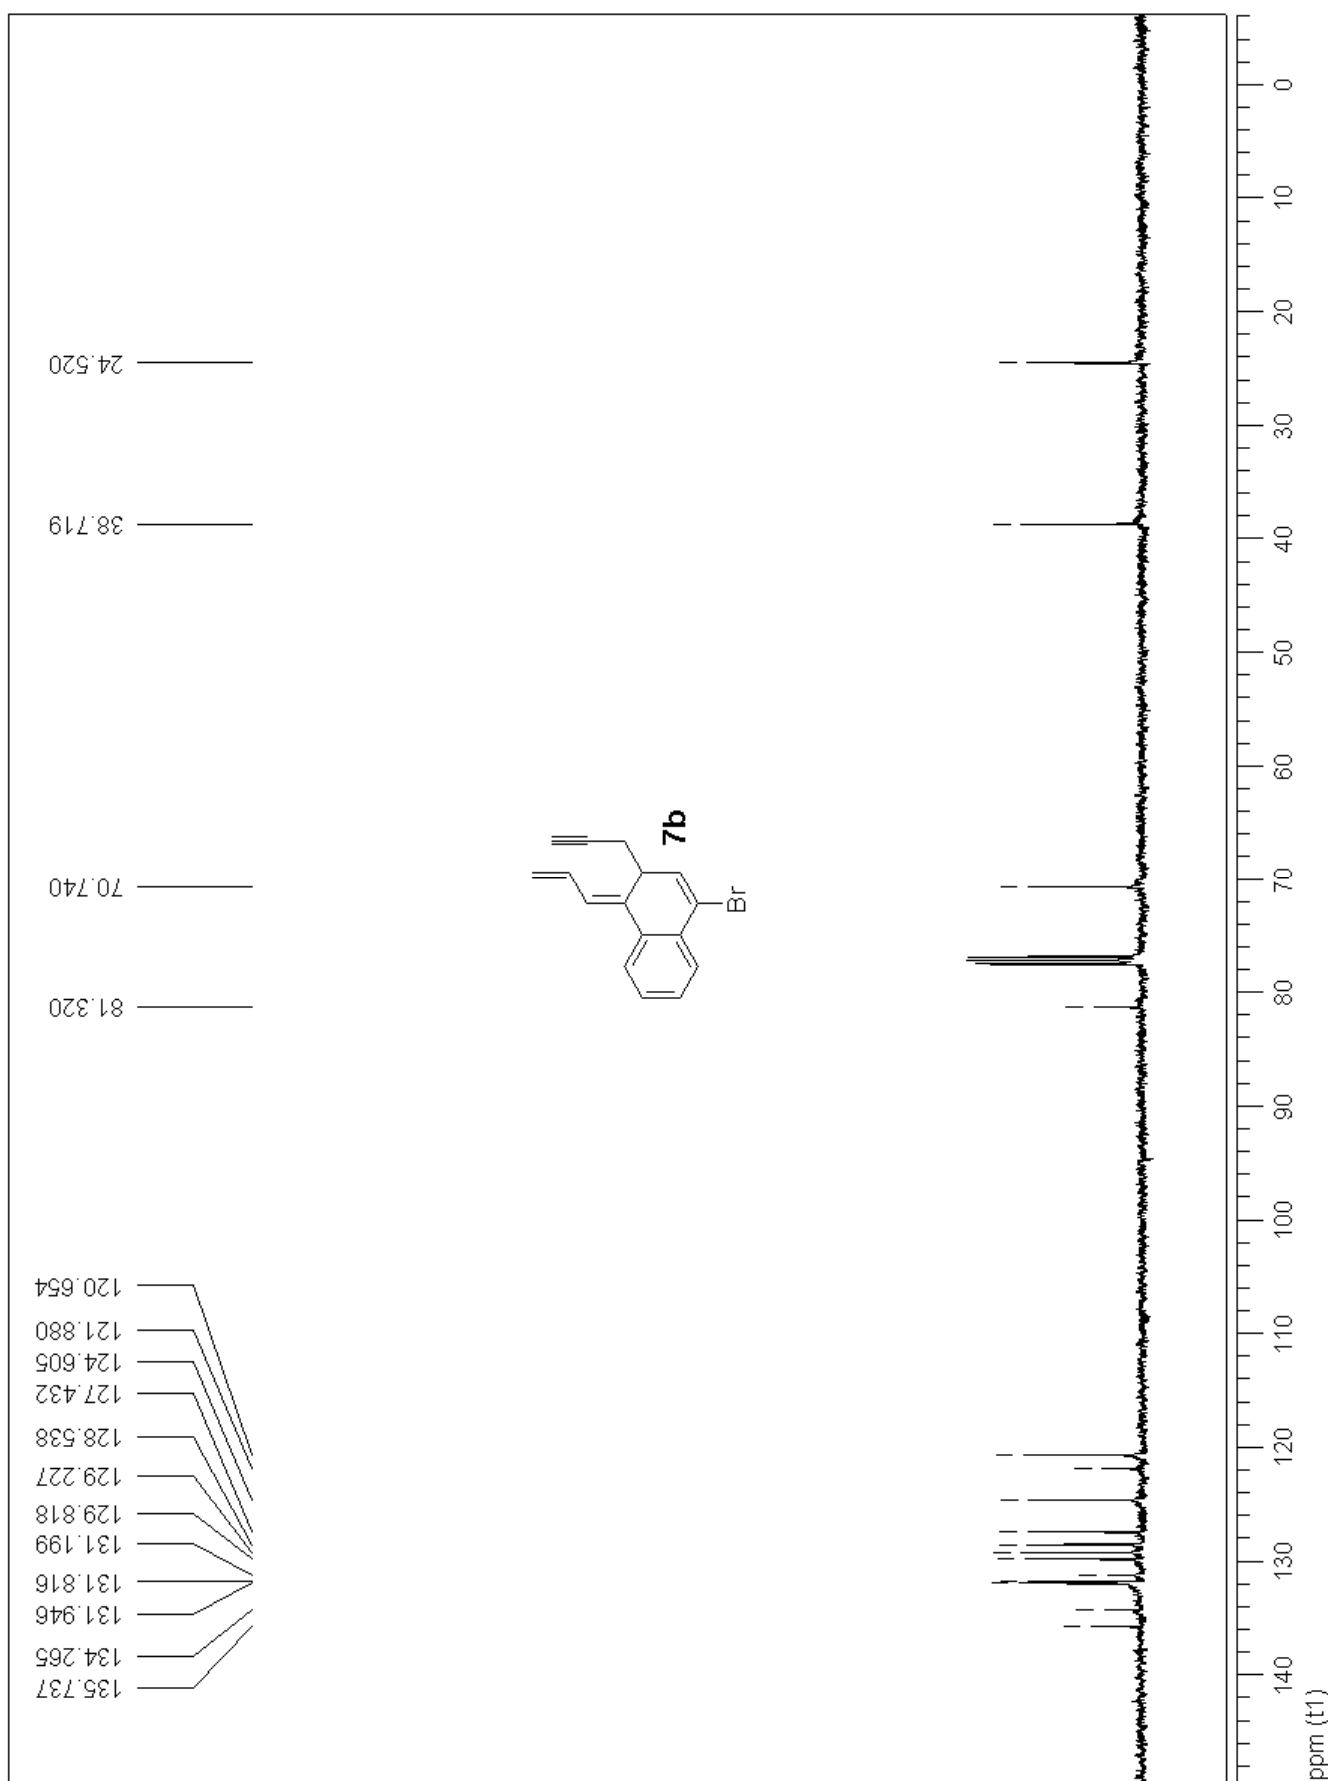

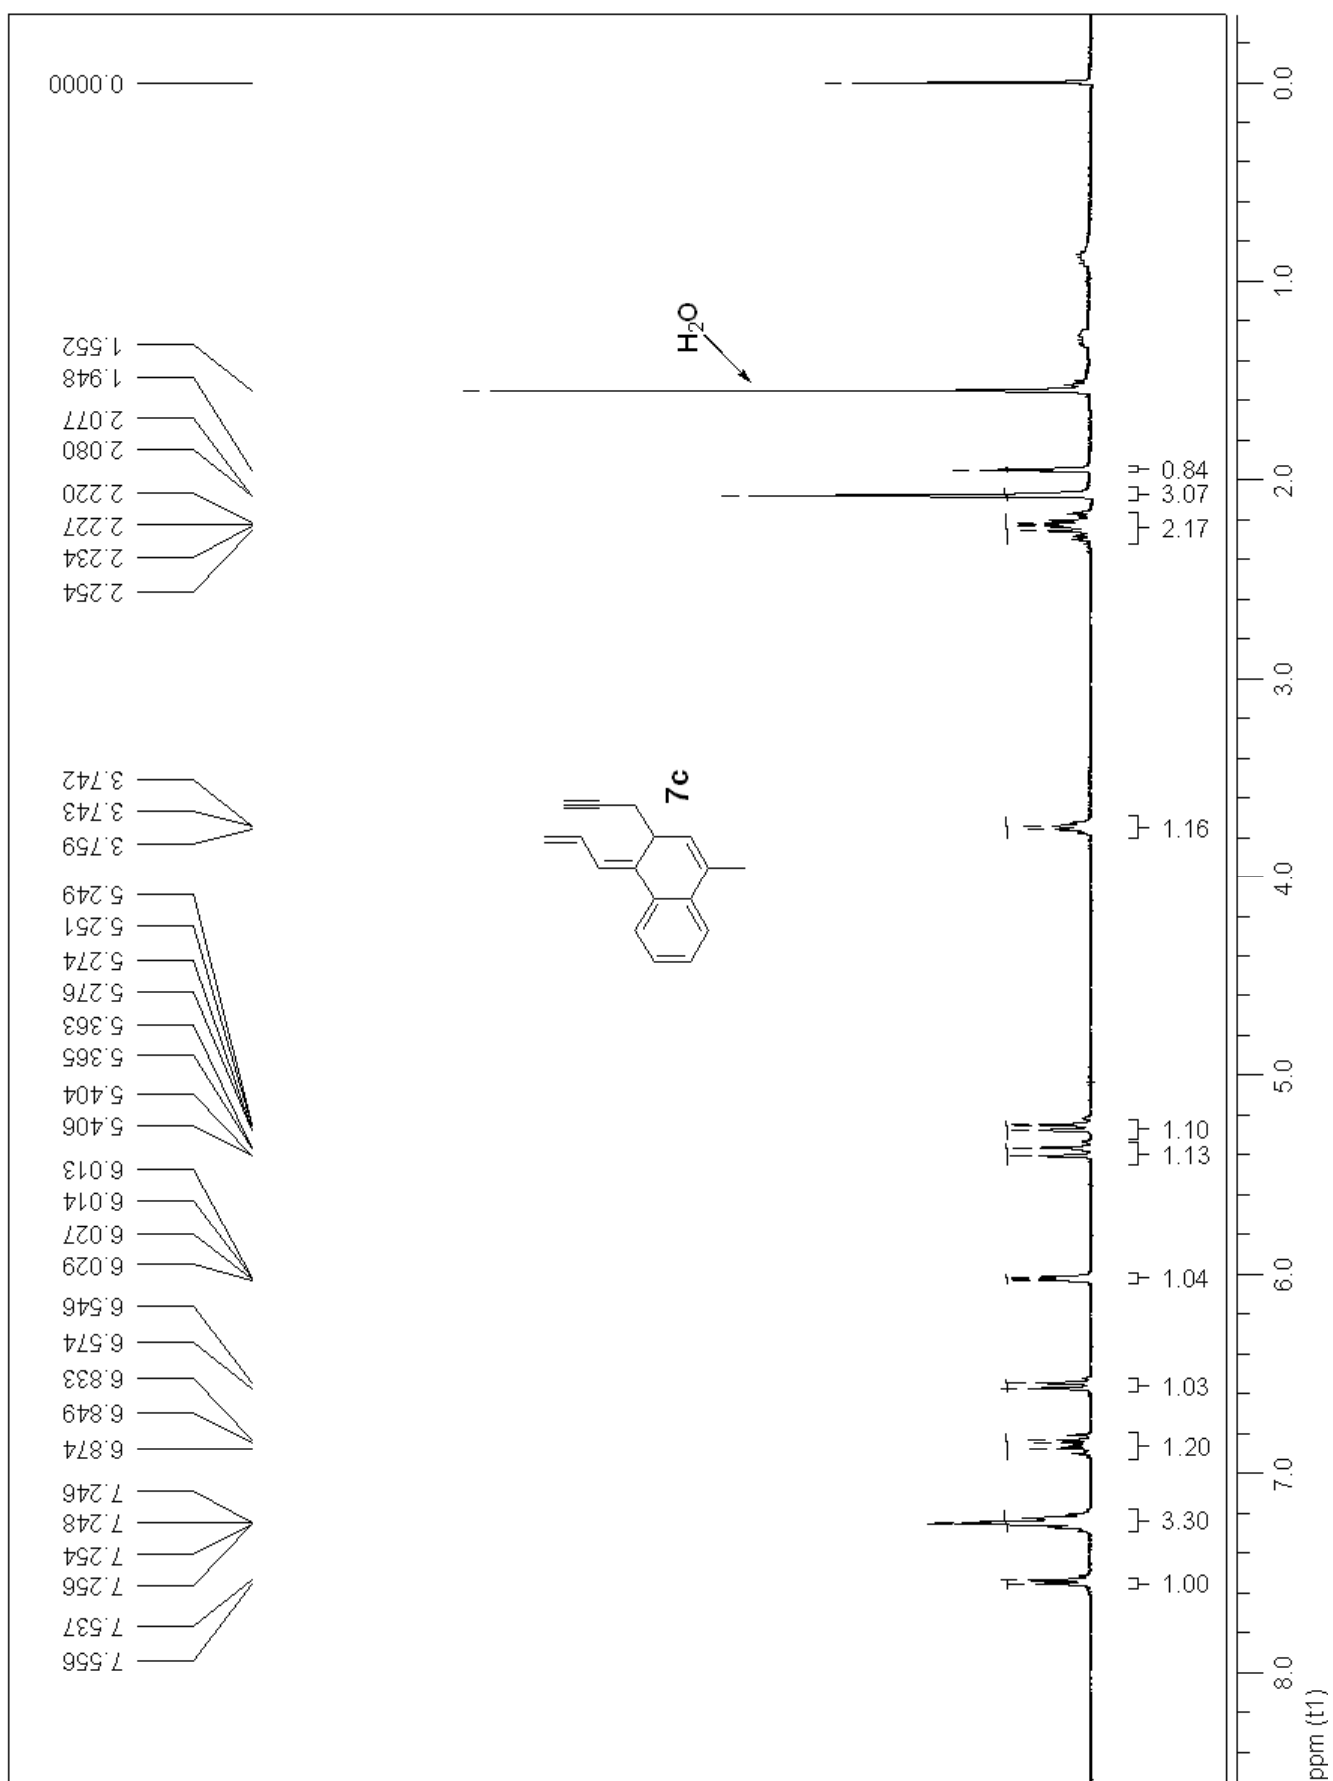

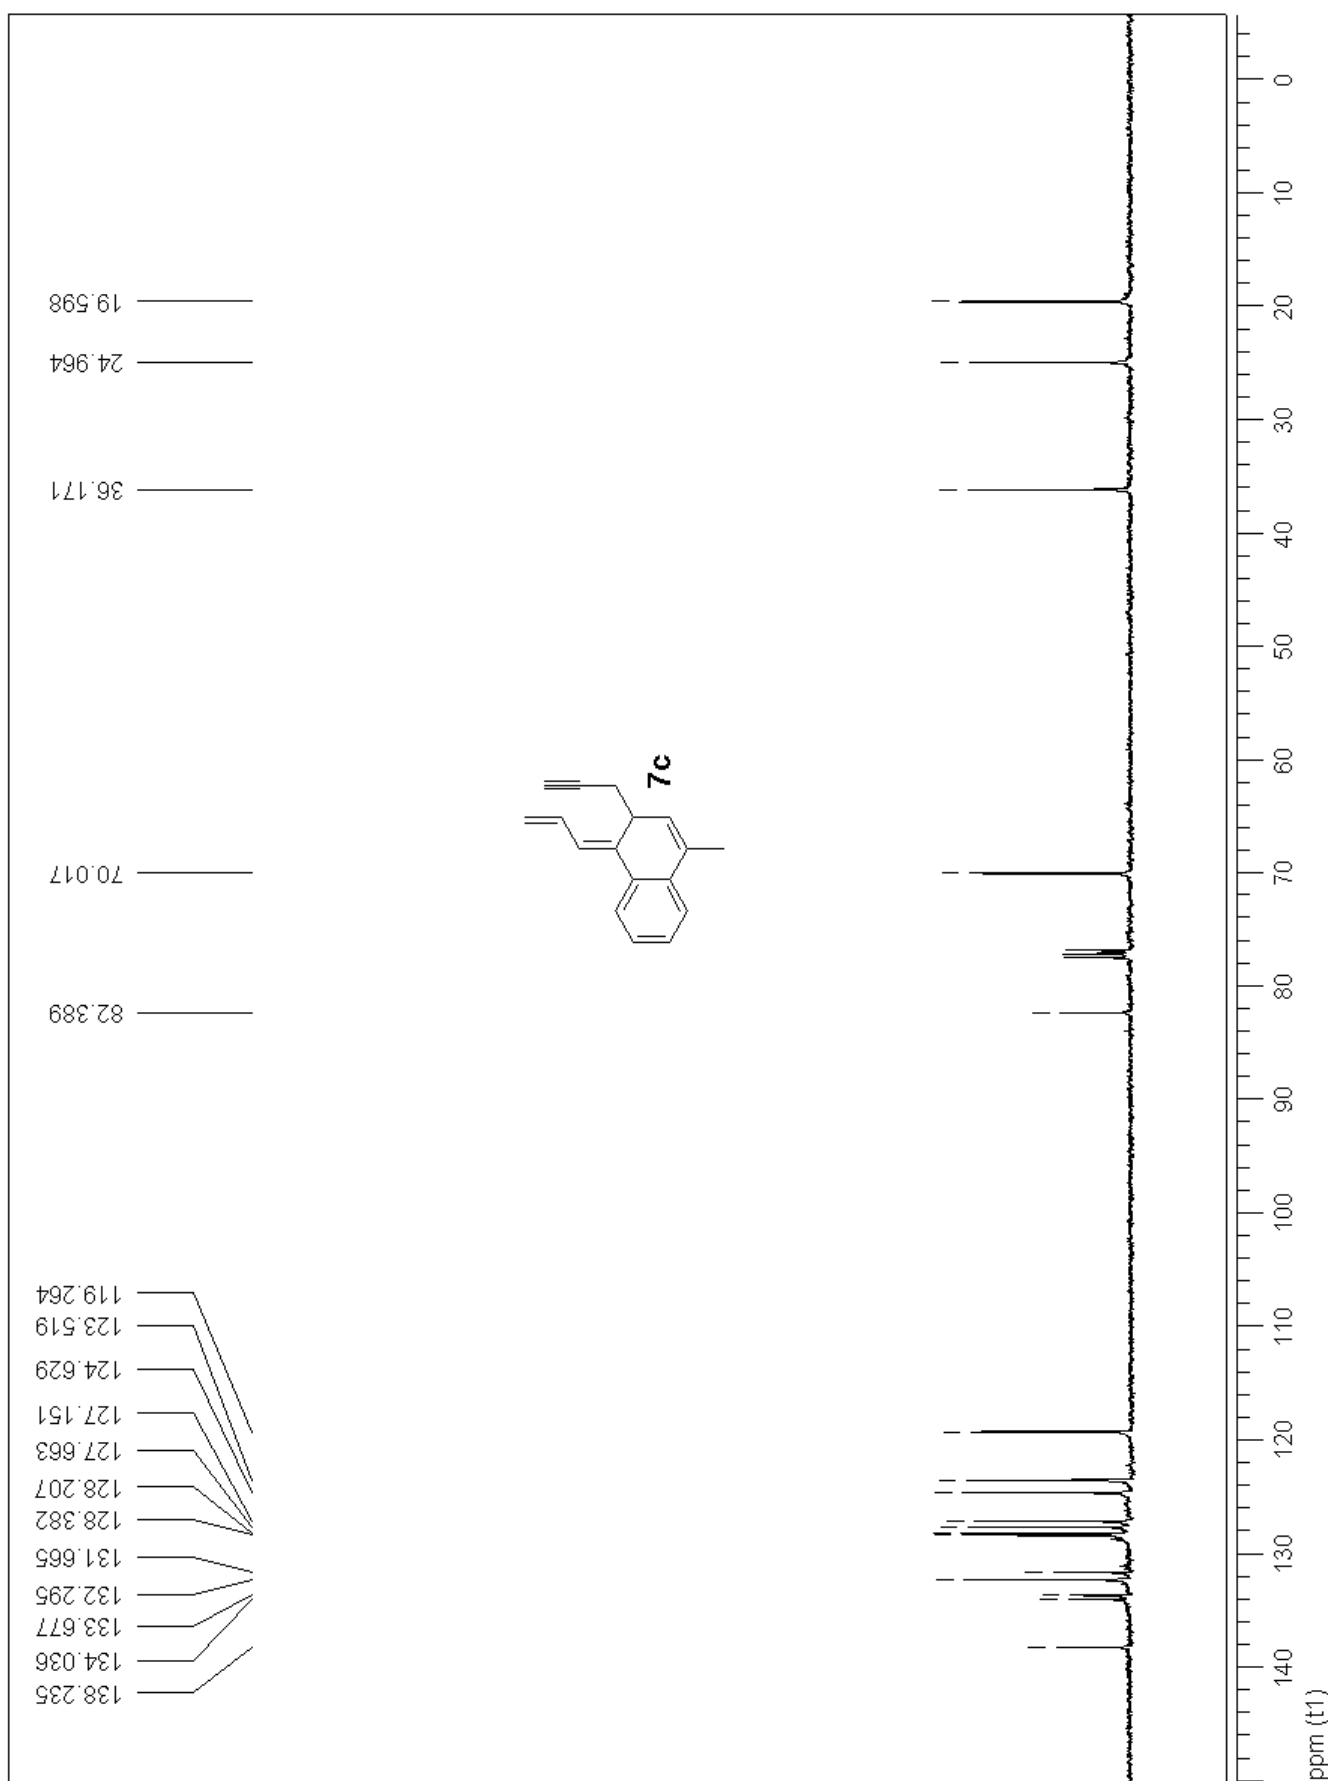

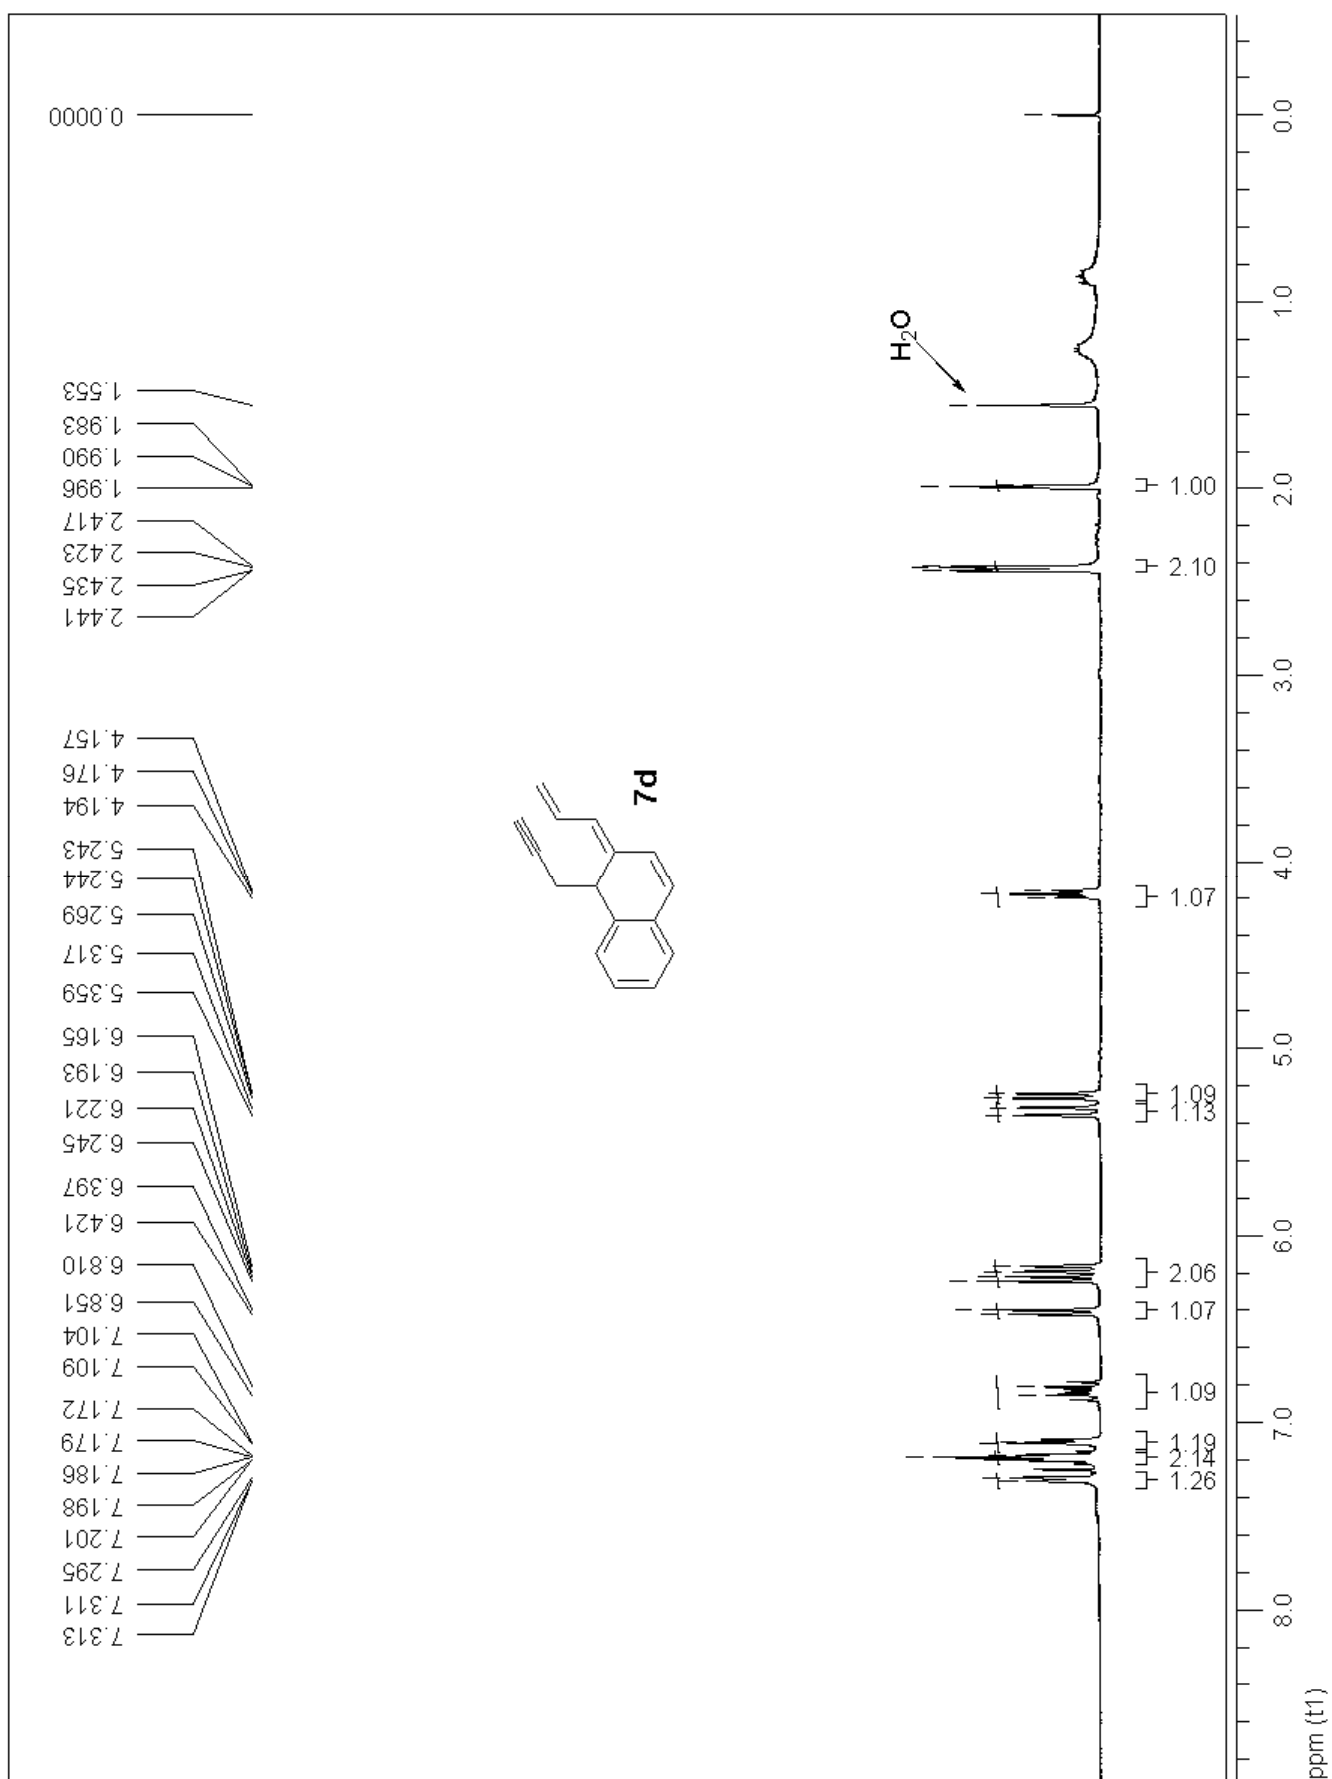

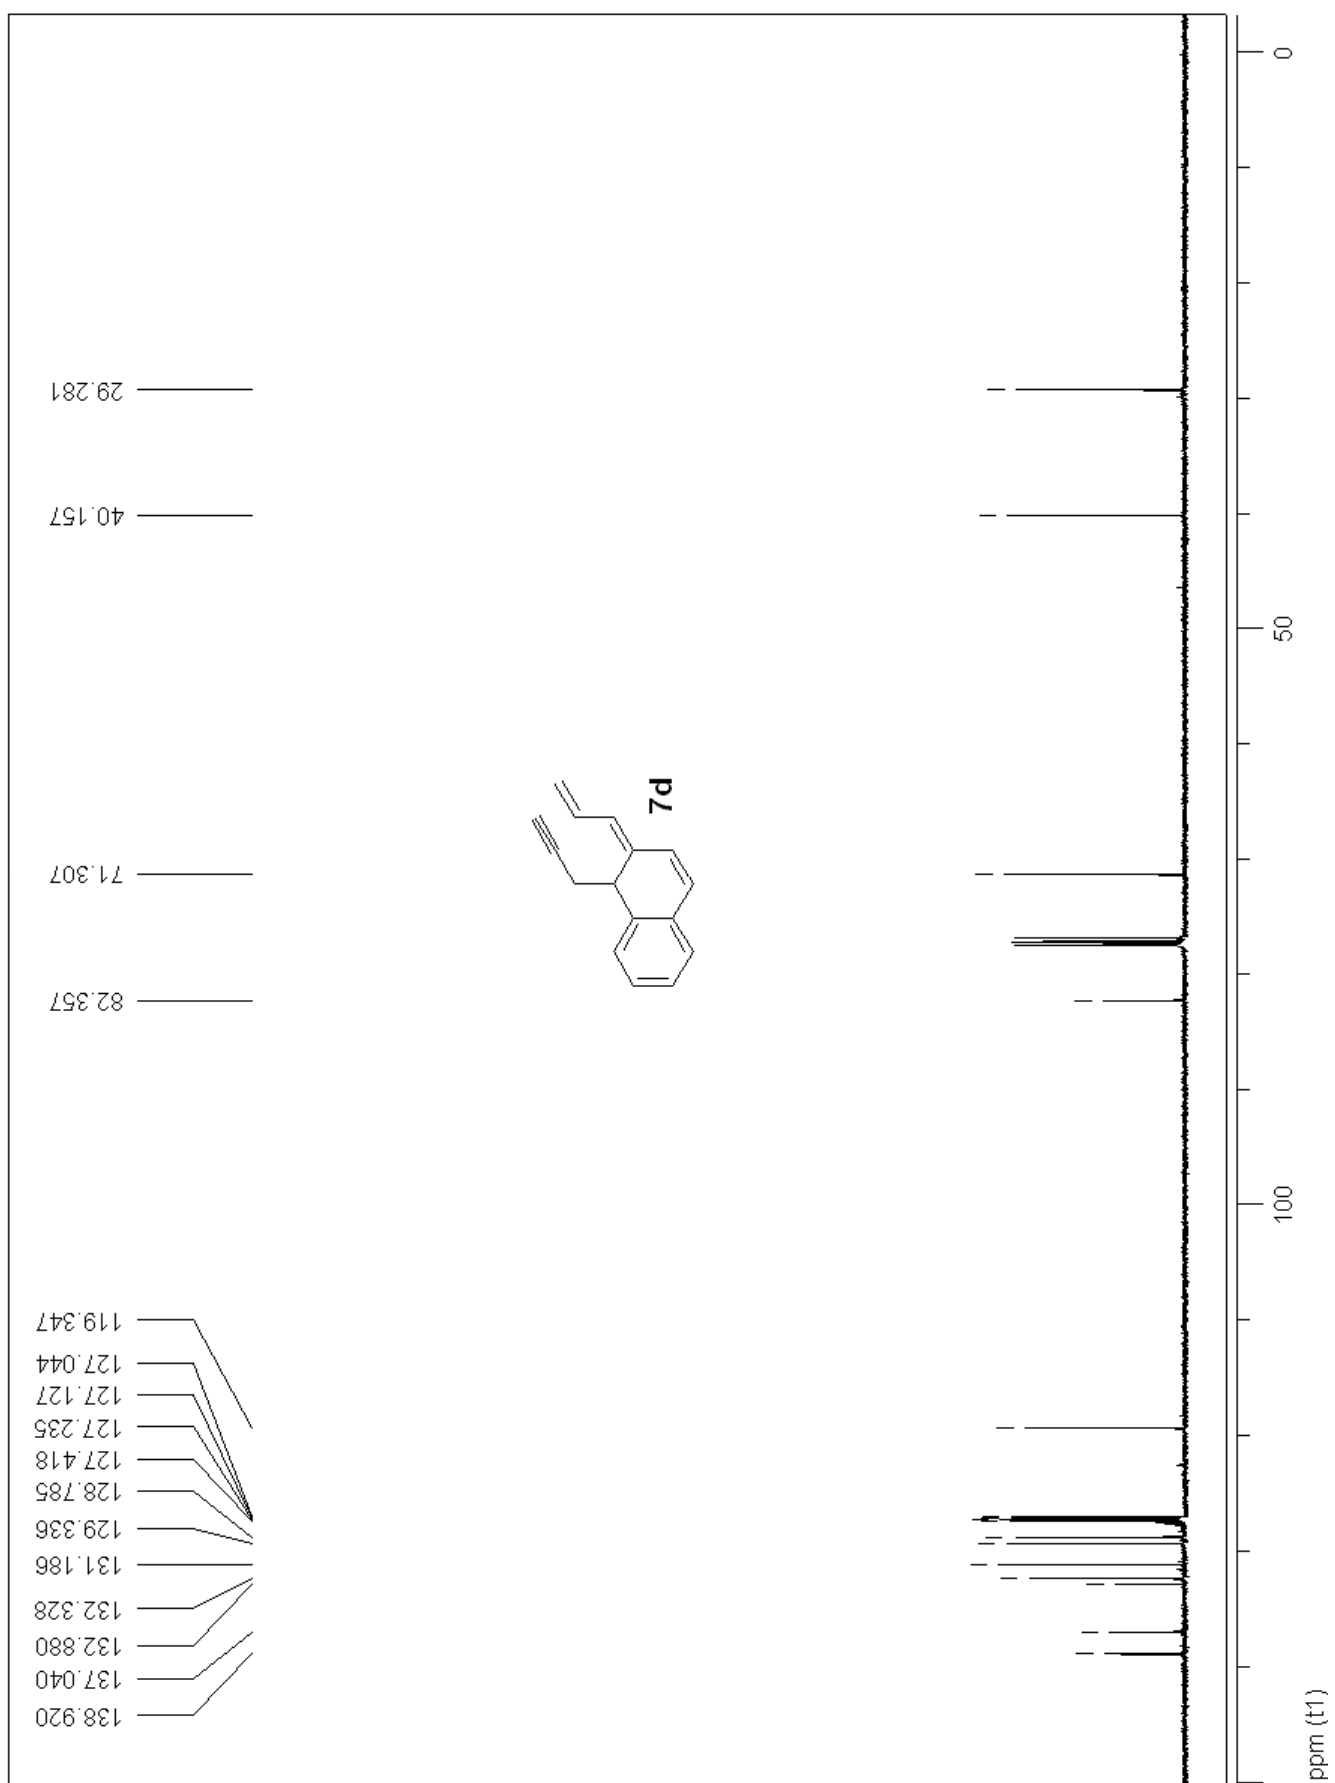



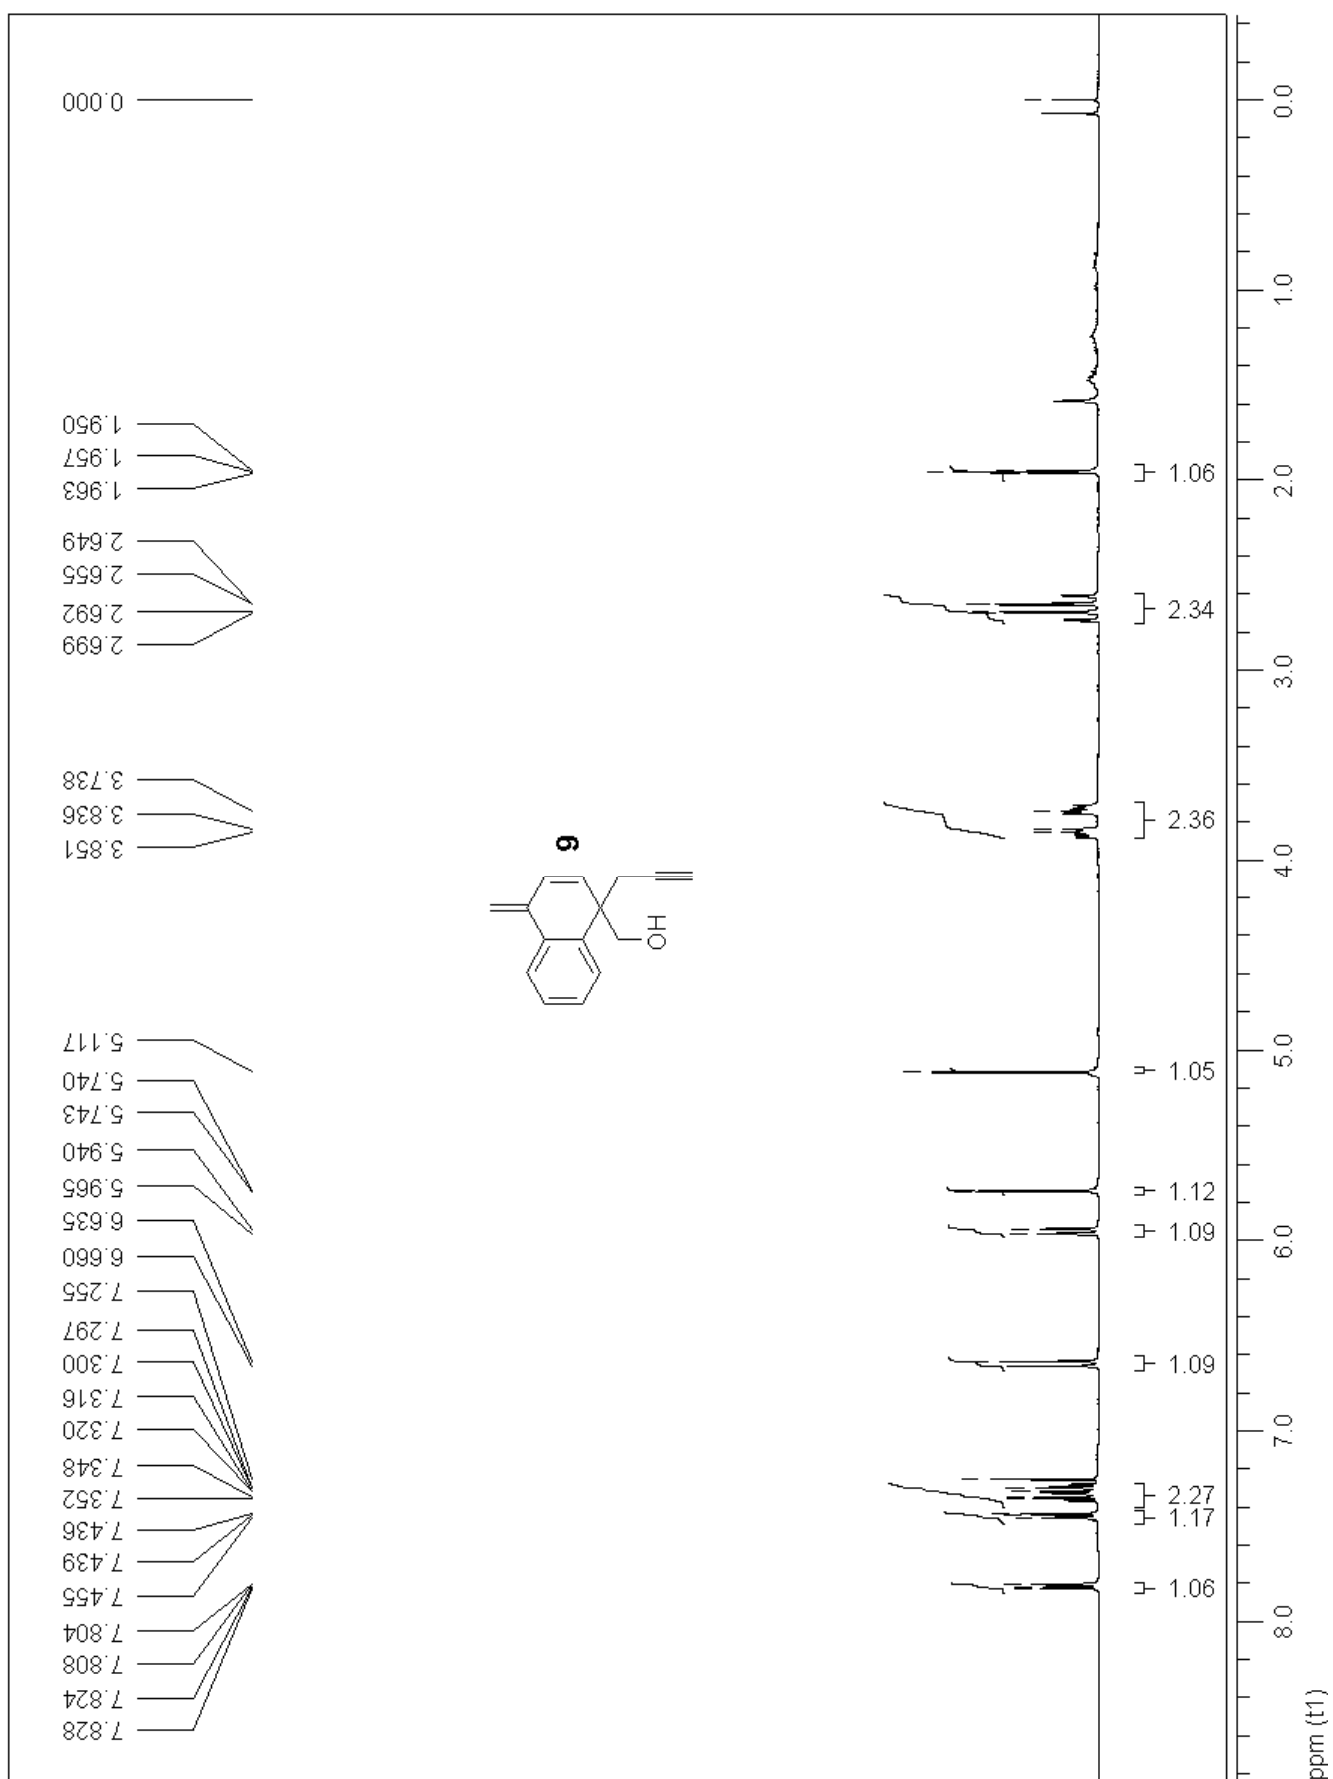

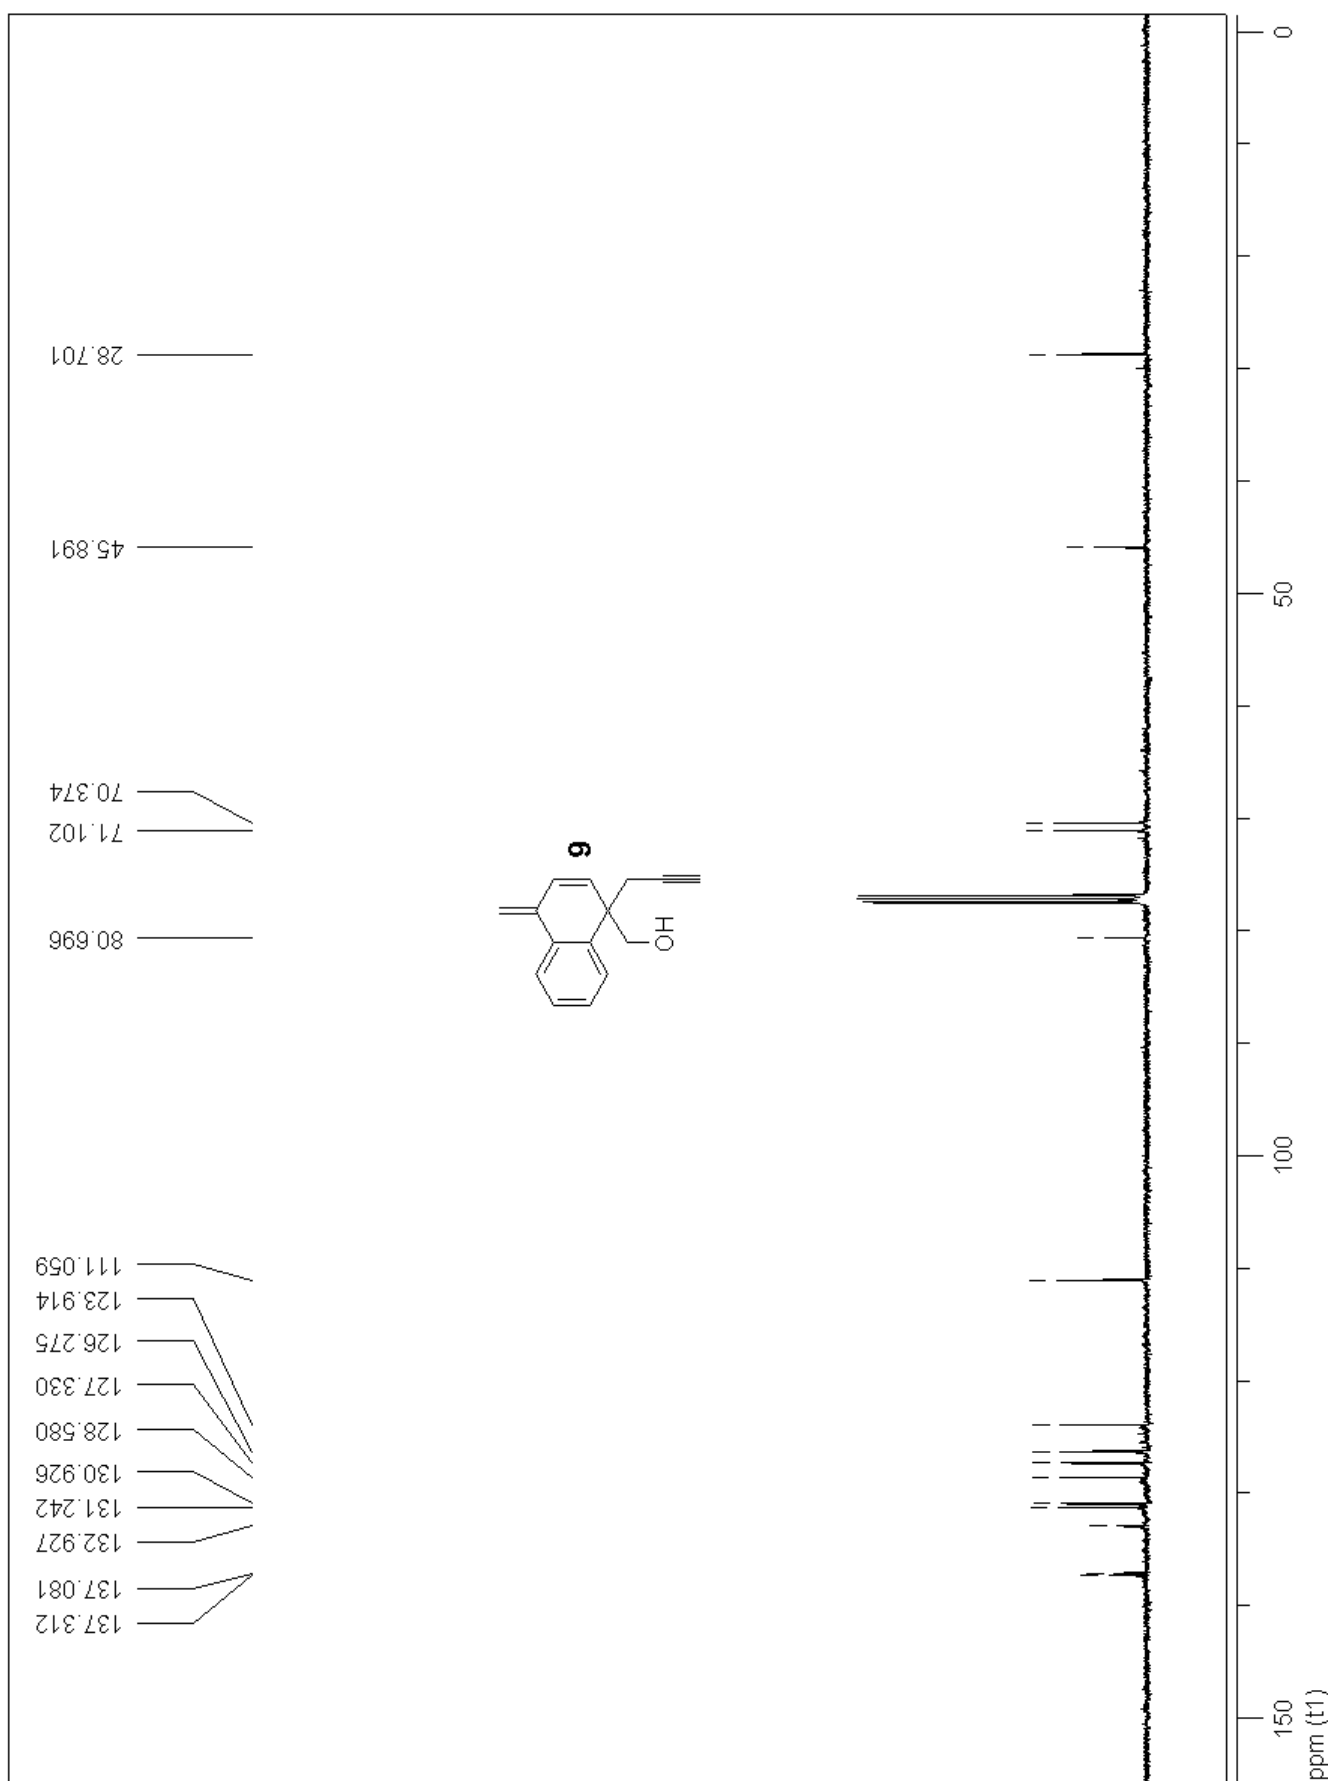

Supplement: Supplementary file 1 [file 4470478]
